# Supplementary material for: Quinine bis-conjugates with quinolone antibiotics and peptides: synthesis and antimalarial bioassay
Source: Royal Society of Chemistry journal article supplement (doi:10.1039/c2ob26439k), 2012-01-01

## Supporting Information

### **Quinine bis-Conjugates with Quinolone Antibiotics and Peptides: Synthesis and Antimalarial Bioassay**

Siva S. Panda,<sup>a</sup> Kiran Bajaj,<sup>a</sup> Marvin J. Meyers,<sup>b</sup> Francis M. Sverdrup<sup>b</sup> and Alan R. Katritzky<sup>\*,a,c</sup>

*<sup>a</sup>Center for Heterocyclic Compounds, Department of Chemistry, University of  
Florida, Gainesville, FL 32611-7200 (USA); Email: katritzky@chem.ufl.edu*

*<sup>b</sup>Center for World Health & Medicine, Saint Louis University, Saint Louis, MO 63104 (USA)*

*<sup>c</sup>Department of Chemistry, King Abdulaziz University, Jeddah, 21589 Saudi Arabia*

#### **Table of Contents**

|                                                                                                |           |
|------------------------------------------------------------------------------------------------|-----------|
| NMR spectra and CHN/HRMS of <b>4c-d</b> , <b>7a-f</b> , <b>8a-k</b> , <b>9d</b> , <b>10a-d</b> | S2-S103   |
| Antimalarial bioassay (Graphs) of <b>8a-k</b> , quinine, antibiotics                           | S104-S107 |

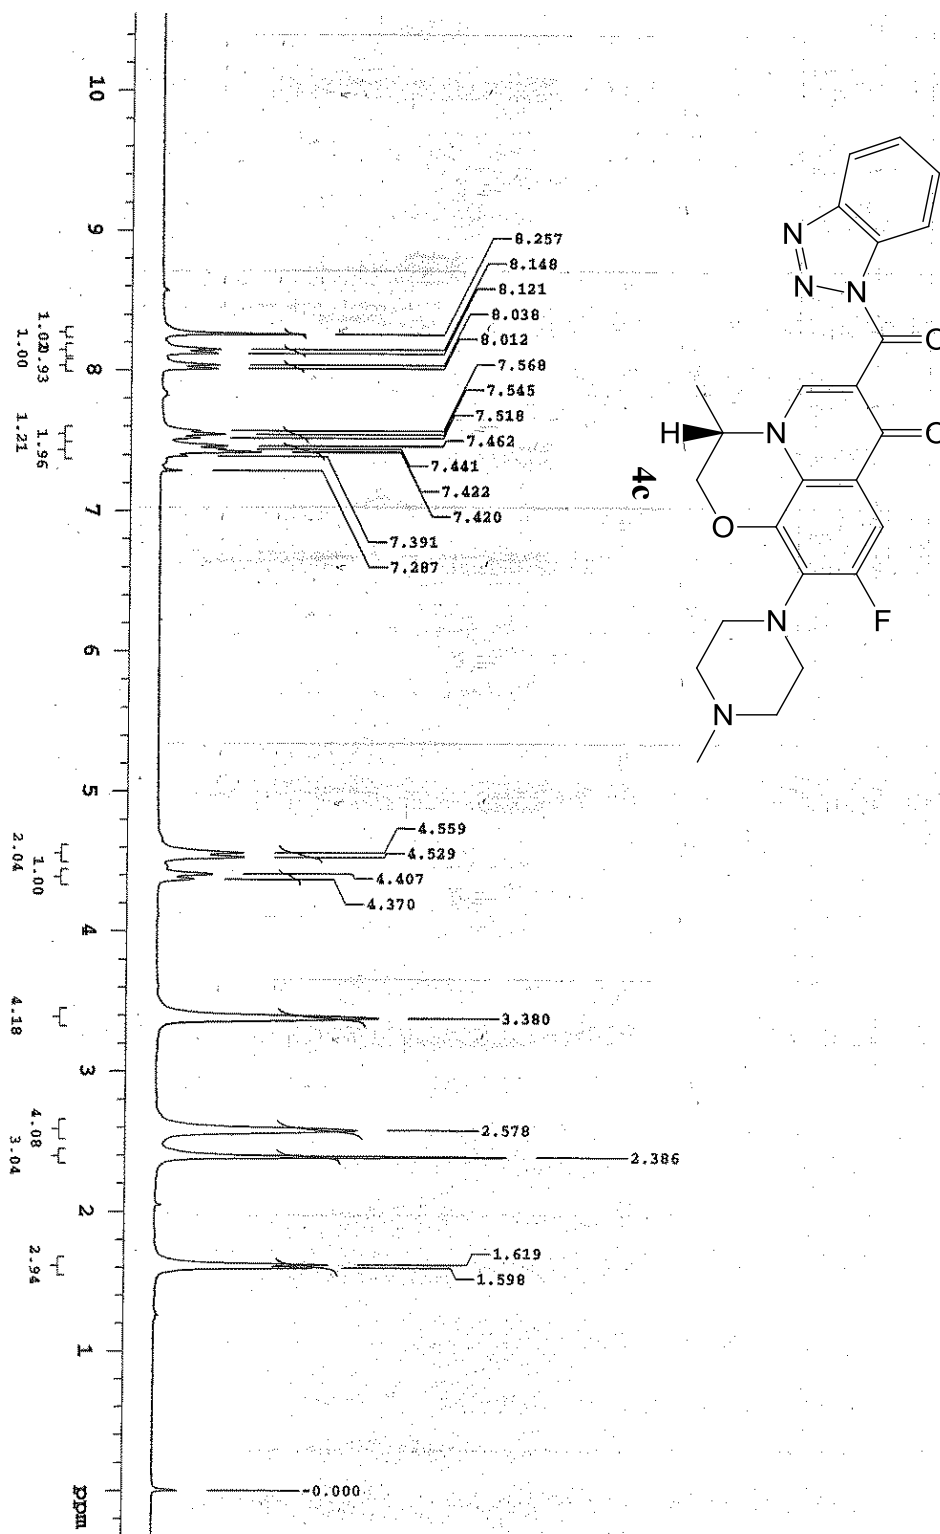

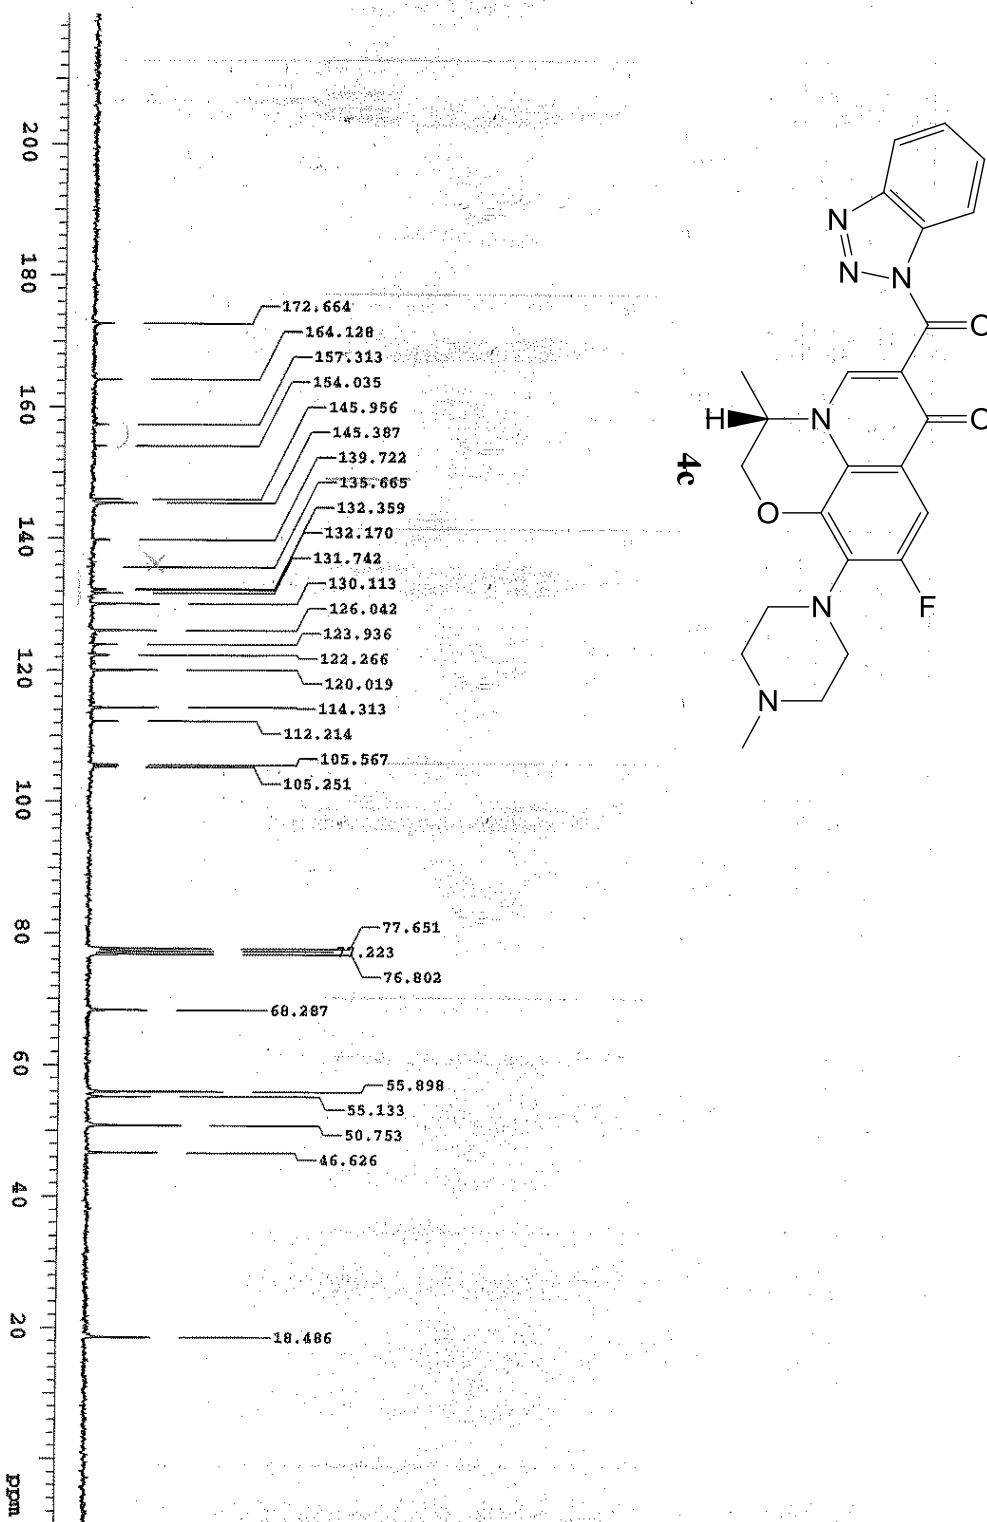

### EAGER 200 Stripchart

Sample Ident. : 30 Levo-Bt      Filename : 262530  
 Analysed : 09-14-11 09:36:35      Printed : 09-14-2011 09:46:38

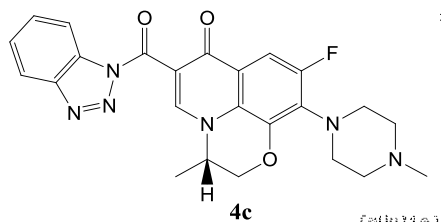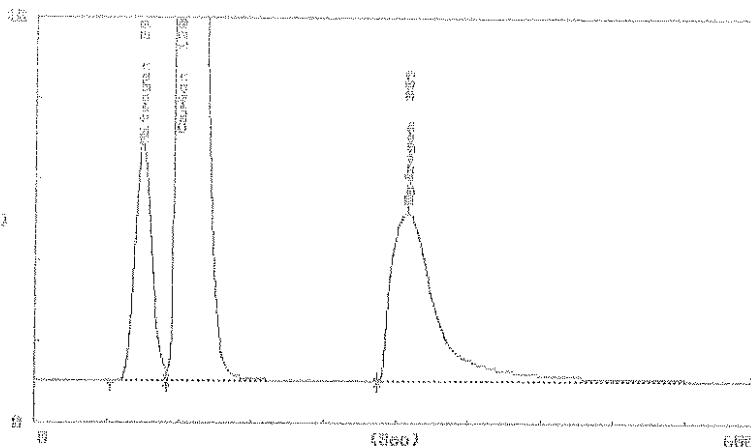

### EAGER 200 Peak Integration Report

Instrument name : Instrument #1      Bline drift (fV): 1  
 Company Name : U of Florida      Operator Ident. : KOU  
 Analysed : 09-14-11 09:36:35      Printed : 09-14-2011 09:46:38  
 Sample Ident. : 30 Levo-Bt      Filename : 262530  
 Sample Weight : 2.127      Calc.method: using 'K. Factors'

| No. (#) | Type (#) | Start (Sec) | End (Sec) | Ret Time (Sec) | Height (fV) | Area (fV*Sec) | Area % (%) | Name     |
|---------|----------|-------------|-----------|----------------|-------------|---------------|------------|----------|
| 1       | FU       | 63          | 109       | 89             | 5801.7      | 89721         | 7.97       | Nitrogen |
| 2       | FU       | 109         | 284       | 120            | 49962.6     | 849475        | 75.47      | Carbon   |
| 3       | RS       | 284         | 598       | 309            | 4124.0      | 186329        | 16.55      | Hydrogen |
|         |          |             |           |                |             | 1125524       | 100.00     |          |

### EAGER 200 Unk Report

Instrument name : Instrument #1      Bline drift (fV): 1  
 Company Name : U of Florida      Operator Ident. : KOU  
 Analysed : 09-14-11 09:36:35      Printed : 09-14-2011 09:46:38  
 Sample Ident. : 30 Levo-Bt      Filename : 262530  
 Sample Weight : 2.127      Calc.method: using 'K. Factors'

| Pk. (#) | Ret Time (Sec) | Area (fV*Sec) | Element % (%) | Area Ratio  | Name     |
|---------|----------------|---------------|---------------|-------------|----------|
| 1       | 89             | 89721         | 18.208        | .246801E+01 | Nitrogen |
| 2       | 120            | 849475        | 62.194        | .100000E+01 | Carbon   |
| 3       | 309            | 186329        | 5.154         | .455901E+01 | Hydrogen |

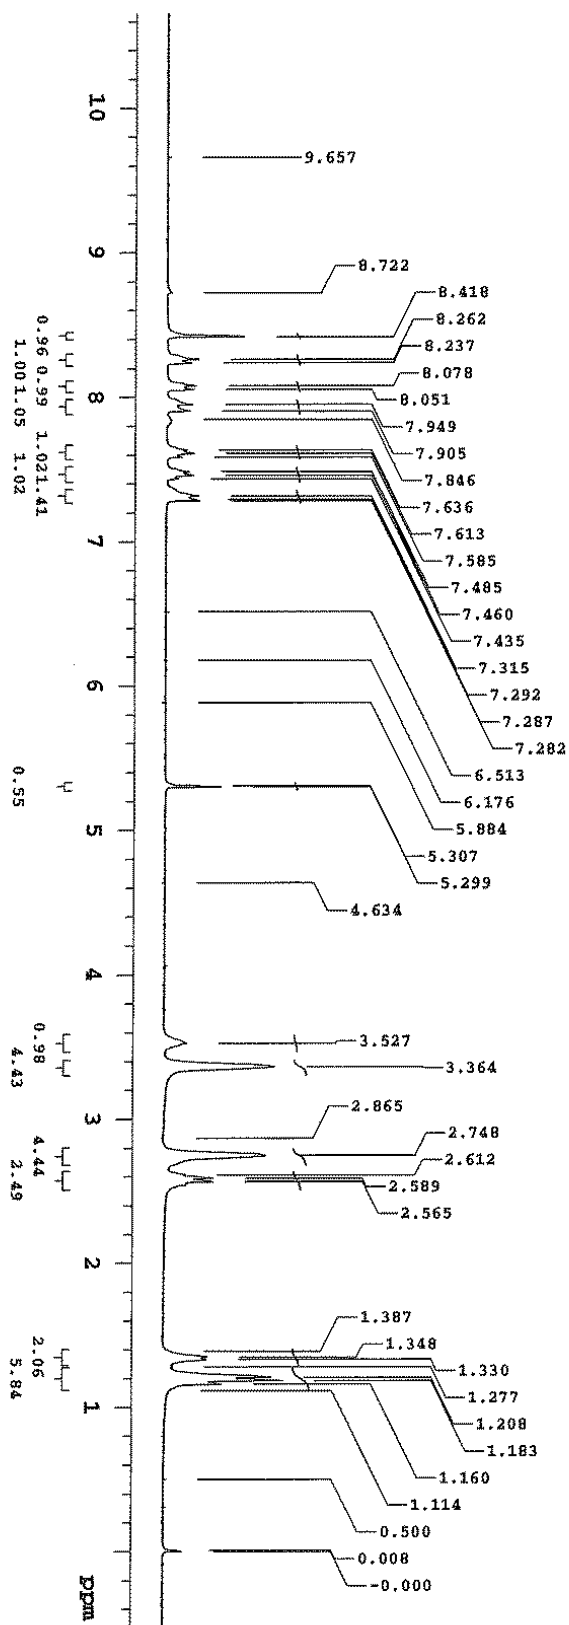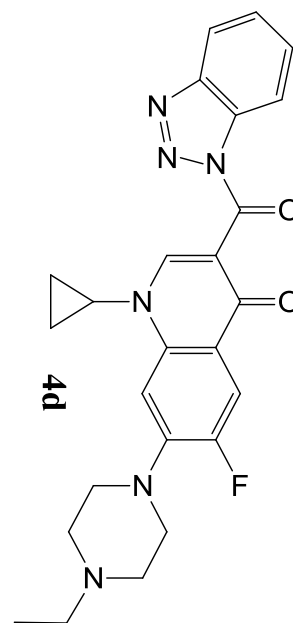

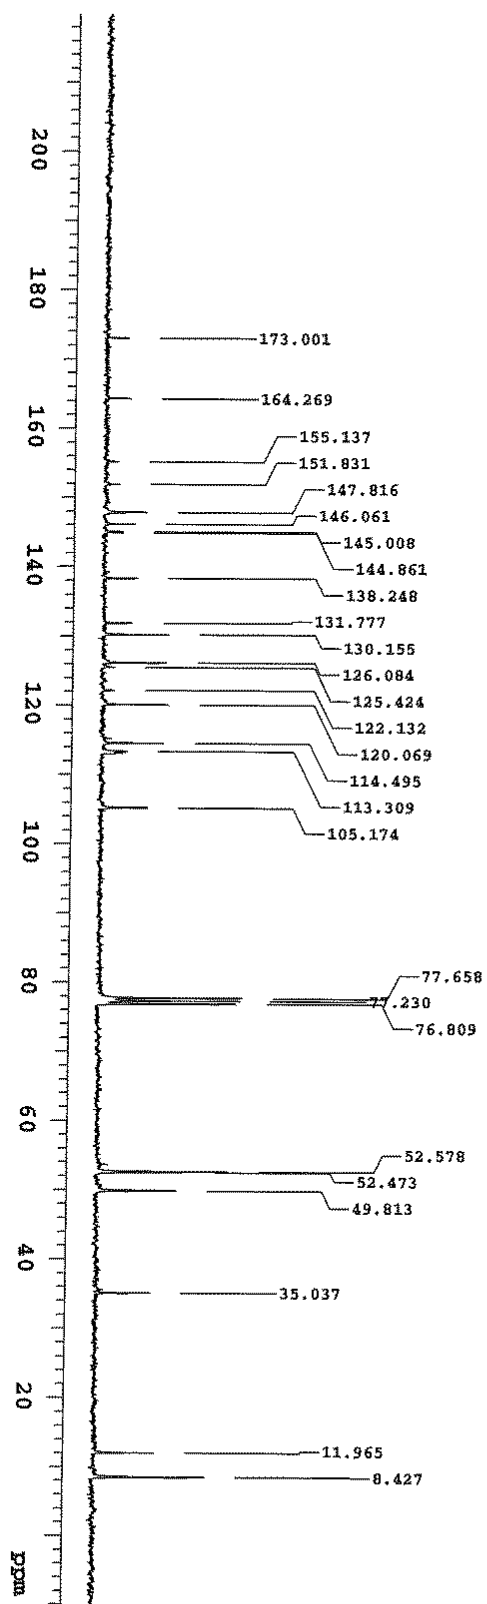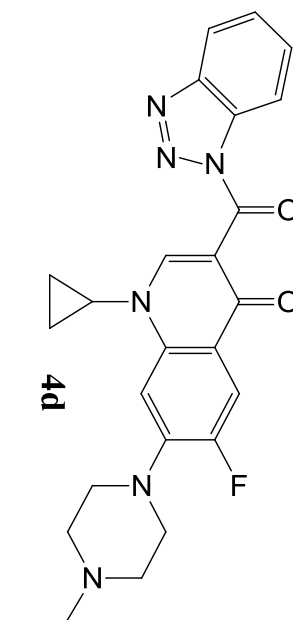

### EAGER 200 Stripchart

Sample Ident. : 26 EN-BT      Filename : 262726  
 Analysed : 09-21-11 09:00:31      Printed : 09-21-2011 09:10:34

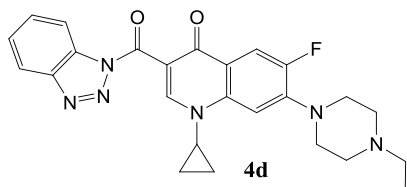

(mV/sec)

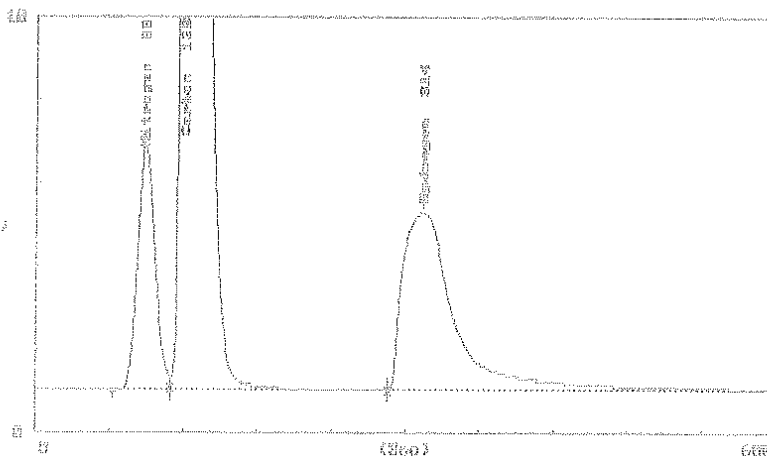

### EAGER 200 Peak Integration Report

Instrument name : Instrument #1      Bline drift (fV): .9  
 Company Name : U of Florida      Operator Ident. : KOU  
 Analysed : 09-21-11 09:00:31      Printed : 09-21-2011 09:10:34  
 Sample Ident. : 26 EN-BT      Filename : 262726  
 Sample Weight : 2.14      Calc.method: using 'K. Factors'

| No. (#) | Type (#) | Start (Sec) | End (Sec) | Ret Time (Sec) | Height (fV) | Area (fV*Sec) | Area % (%) | Name     |  |
|---------|----------|-------------|-----------|----------------|-------------|---------------|------------|----------|--|
| 1       | FU       | 63          | 109       | 88             | 5809.5      | 89953         | 7.59       | Nitrogen |  |
| 2       | FU       | 109         | 285       | 120            | 51610.3     | 886945        | 74.81      | Carbon   |  |
| 3       | IC       | 285         | 598       | 314            | 4267.7      | 208718        | 17.60      | Hydrogen |  |
|         |          |             |           |                |             |               | 1185617    | 100.00   |  |

### EAGER 200 Unk Report

Instrument name : Instrument #1      Bline drift (fV): .9  
 Company Name : U of Florida      Operator Ident. : KOU  
 Analysed : 09-21-11 09:00:31      Printed : 09-21-2011 09:10:34  
 Sample Ident. : 26 EN-BT      Filename : 262726  
 Sample Weight : 2.14      Calc.method: using 'K. Factors'

| Pk. (#) | Ret Time (Sec) | Area (fV*Sec) | Element % (%) | Area Ratio  | Name     |
|---------|----------------|---------------|---------------|-------------|----------|
| 1       | 88             | 89953         | 18.166        | .936009E+01 | Nitrogen |
| 2       | 120            | 886945        | 64.949        | .100000E+01 | Carbon   |
| 3       | 314            | 208718        | 5.905         | .424948E+01 | Hydrogen |

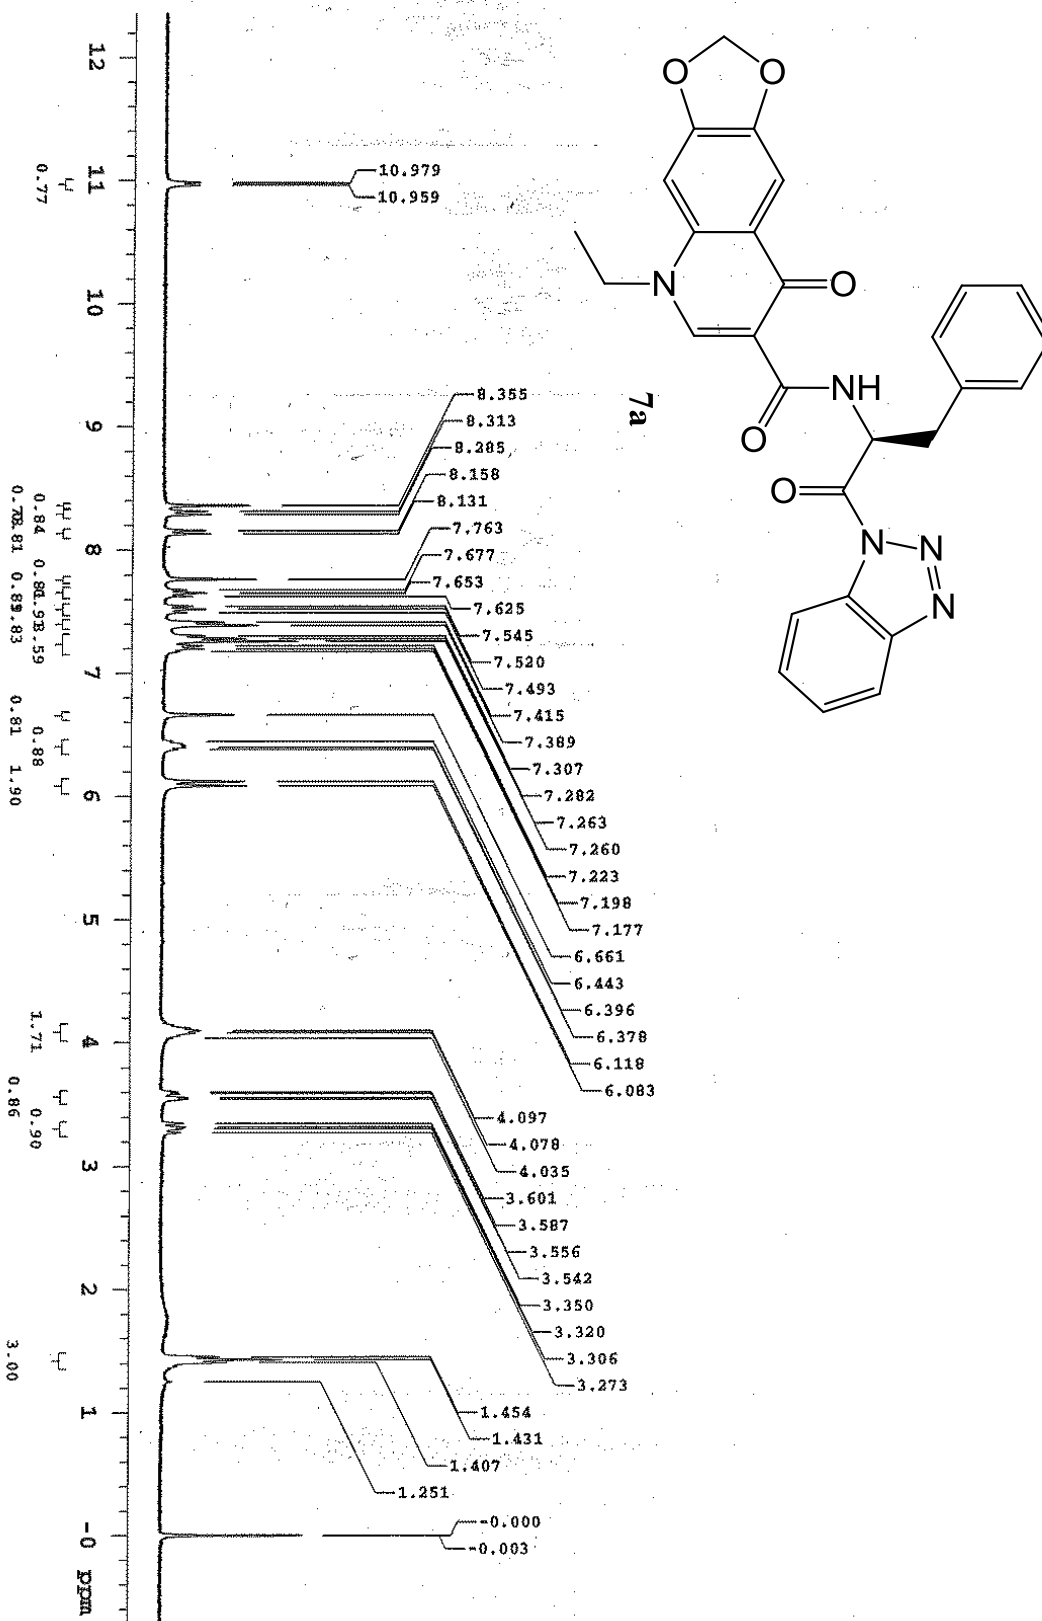



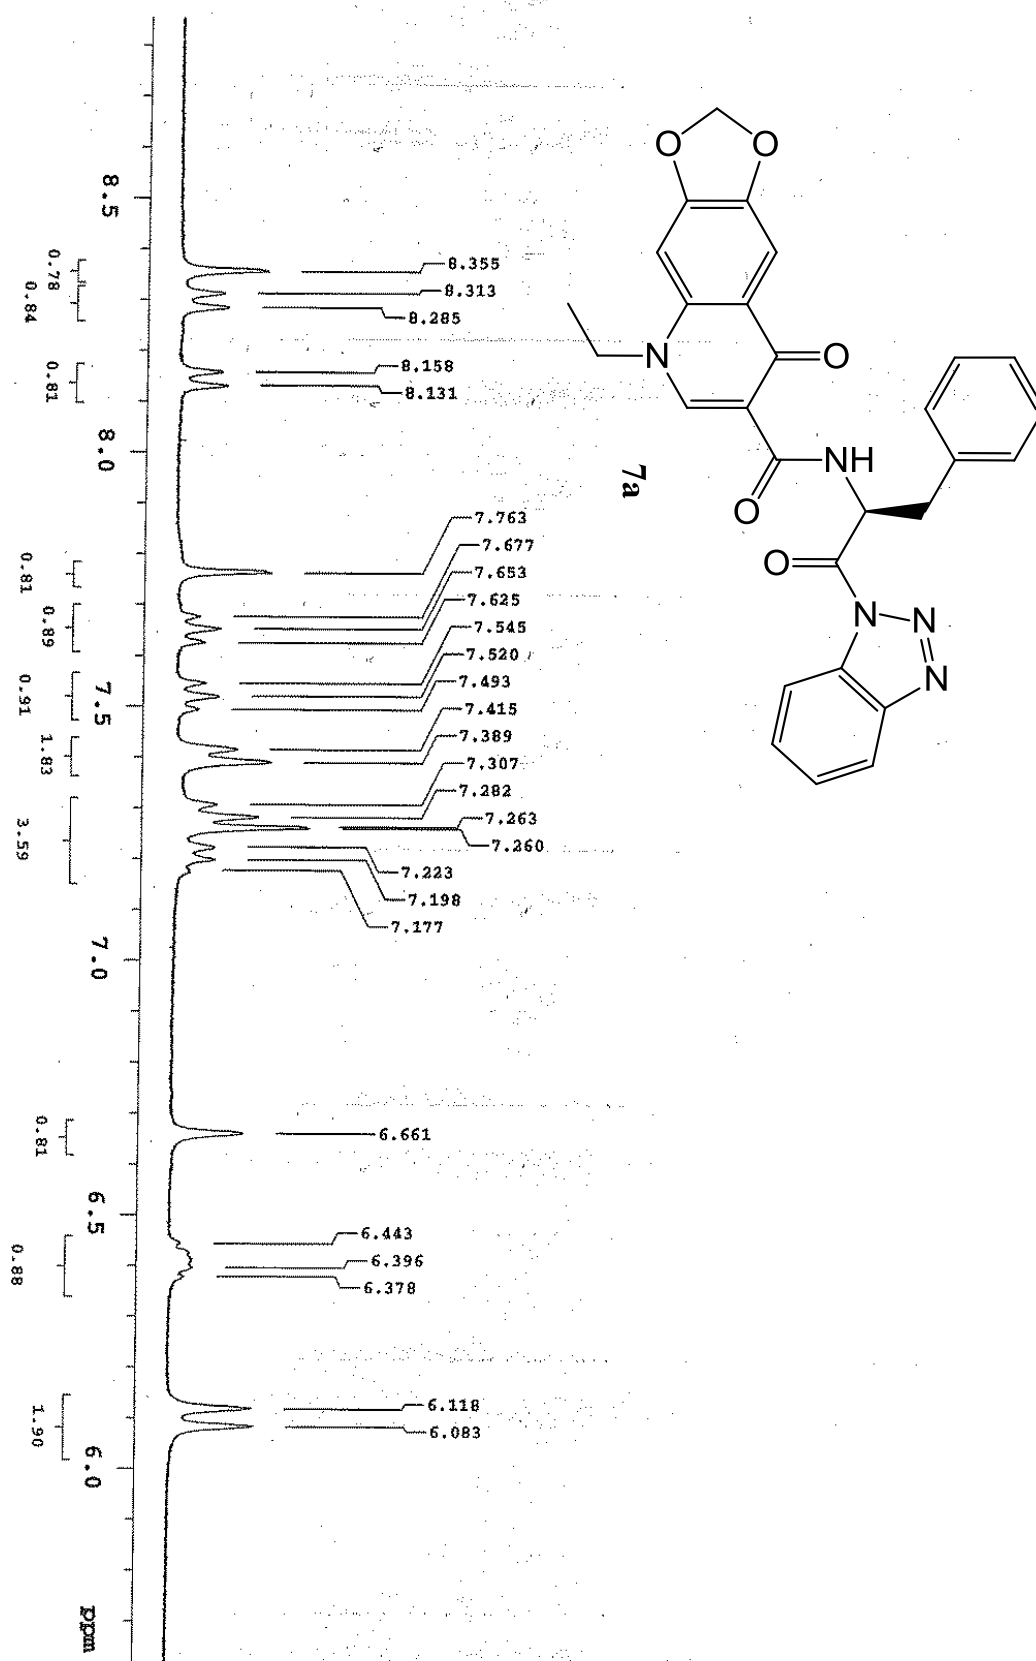

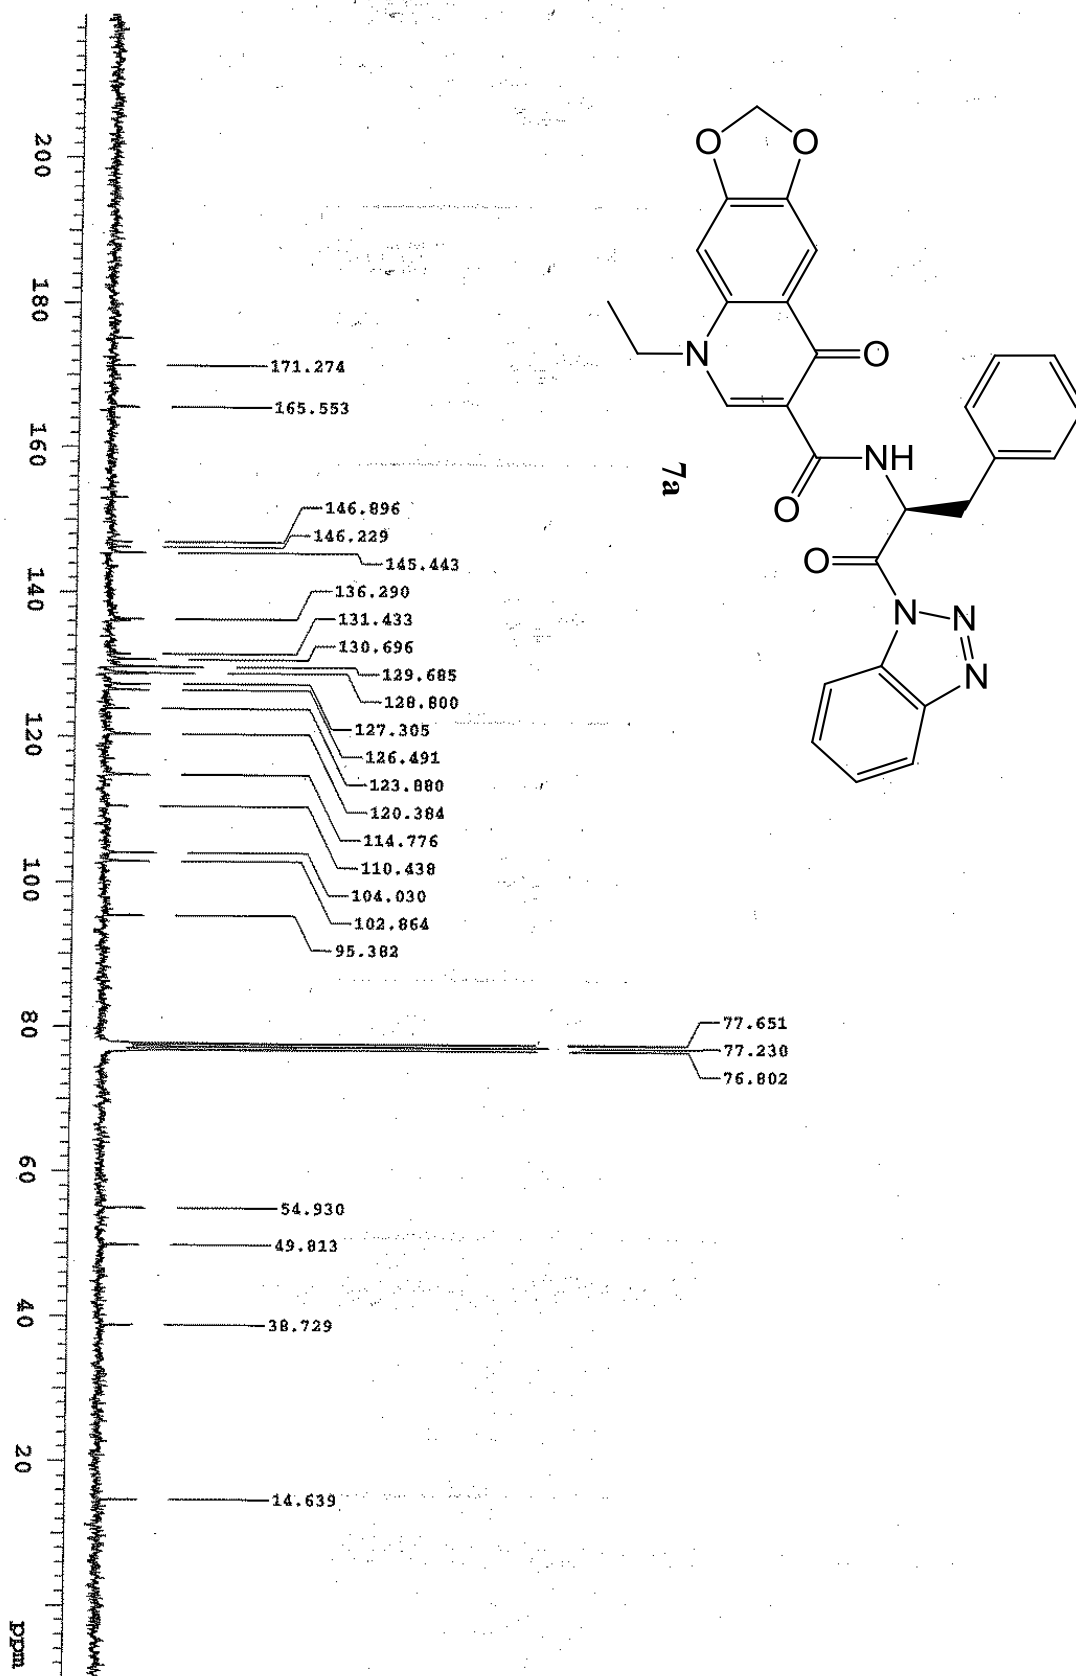

EAGER 200 Stripchart

Sample Ident. : 28 OX0-Phe-Bt      Filename : 258928  
 Analysed : 06-14-11 09:14:37      Printed : 06-14-2011 11:23:09

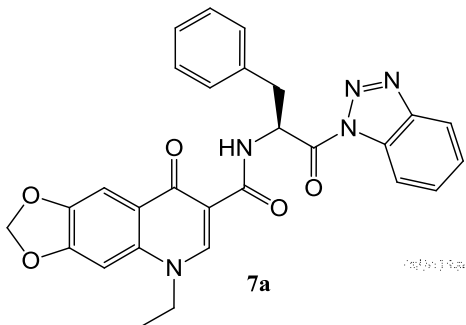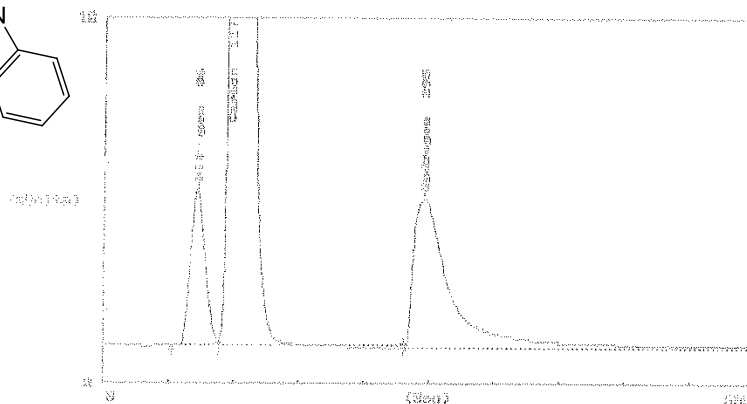

EAGER 200 Peak Integration Report

Instrument name : Instrument #1      Bline drift (fV):-3.6  
 Company Name : U of Florida      Operator Ident. : KOU  
 Analysed : 06-14-11 09:14:37      Printed : 06-14-2011 11:23:10  
 Sample Ident. : 28 OX0-Phe-Bt      Filename : 258928  
 Sample Weight : 2.066      Calc.method: using 'K. Factors'

| No. (#) | Type (#) | Start (Sec) | End (Sec) | Ret Time (Sec) | Height (fV) | Area (fV*Sec) | Area % (%) | Name     |
|---------|----------|-------------|-----------|----------------|-------------|---------------|------------|----------|
| 1       | FU       | 63          | 106       | 86             | 4289.6      | 63205         | 5.95       | Nitrogen |
| 2       | FU       | 106         | 277       | 117            | 51047.2     | 837355        | 78.82      | Carbon   |
| 3       | RS       | 277         | 598       | 225            | 4040.5      | 161767        | 15.23      | Hydrogen |

1062327 100.00

EAGER 200 Unk Report

Instrument name : Instrument #1      Bline drift (fV):-3.6  
 Company Name : U of Florida      Operator Ident. : KOU  
 Analysed : 06-14-11 09:14:37      Printed : 06-14-2011 11:23:10  
 Sample Ident. : 28 OX0-Phe-Bt      Filename : 258928  
 Sample Weight : 2.066      Calc.method: using 'K. Factors'

| Pk. (#) | Ret Time (Sec) | Area (fV*Sec) | Element % (%) | Area Ratio  | Name     |
|---------|----------------|---------------|---------------|-------------|----------|
| 1       | 86             | 63205         | 13.642        | .132483E+02 | Nitrogen |
| 2       | 117            | 837355        | 65.779        | .100000E+01 | Carbon   |
| 3       | 225            | 161767        | 4.400         | .517631E+01 | Hydrogen |

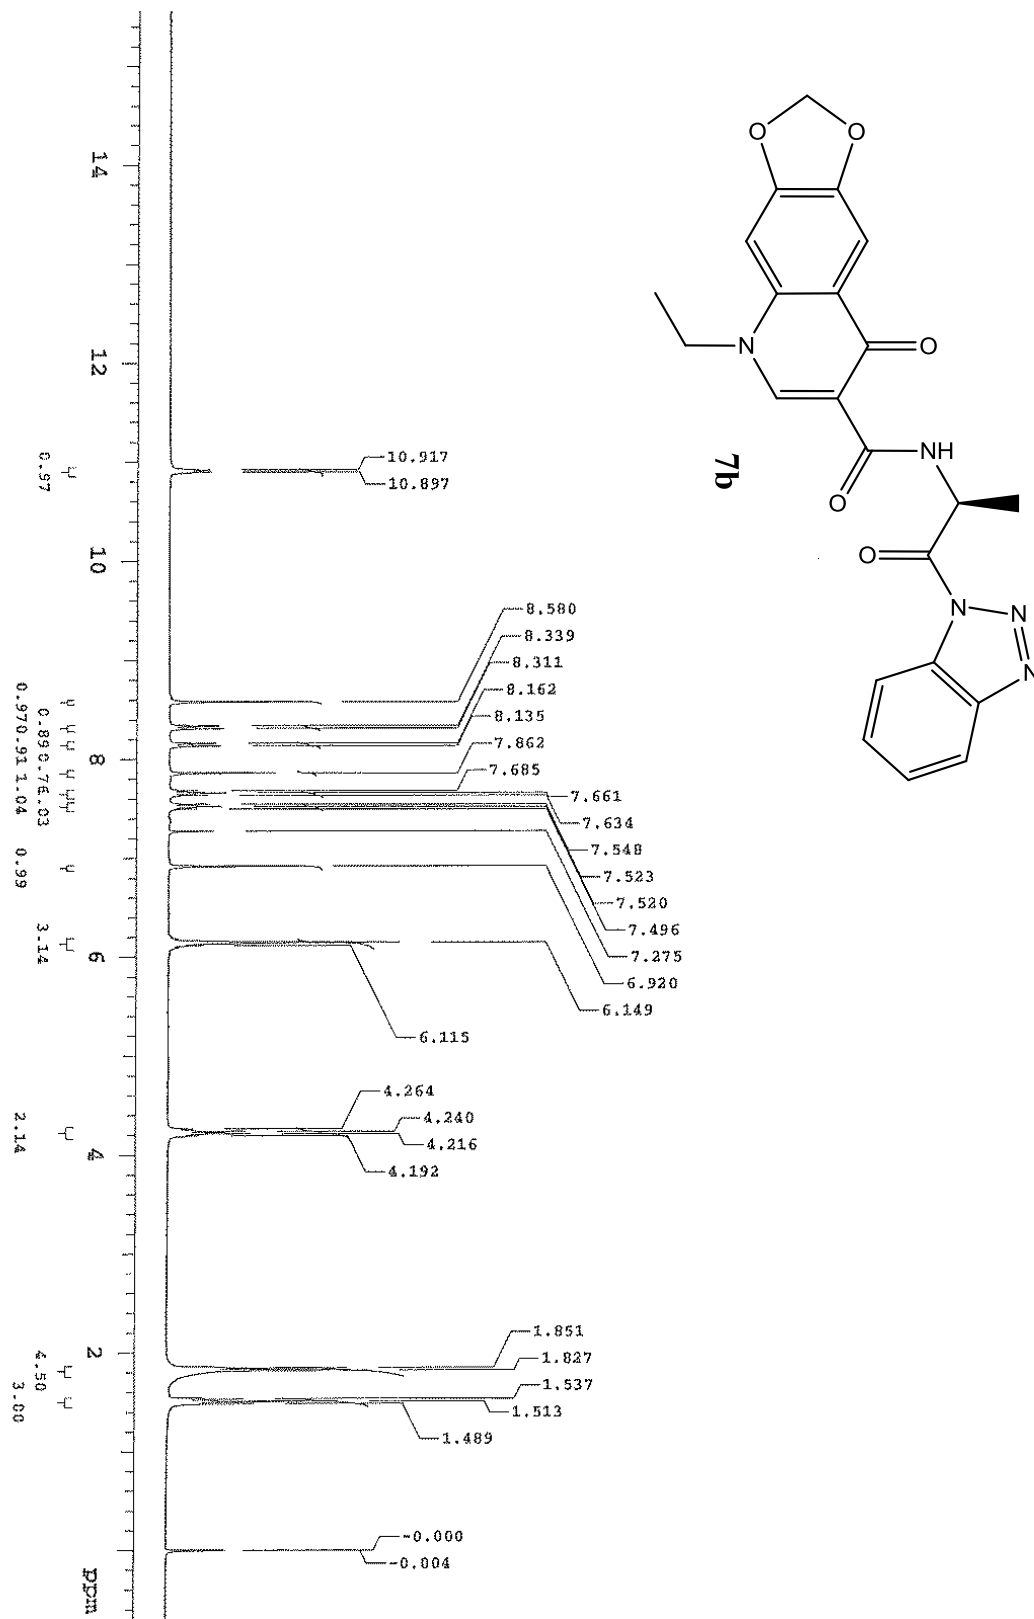

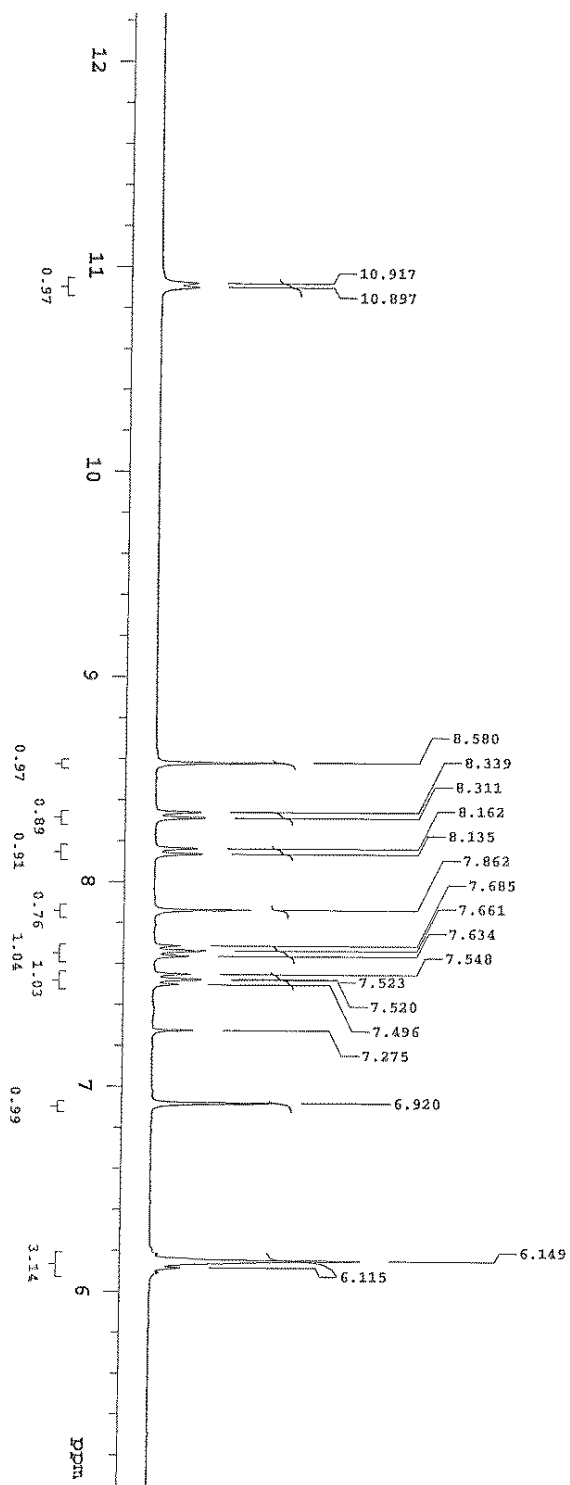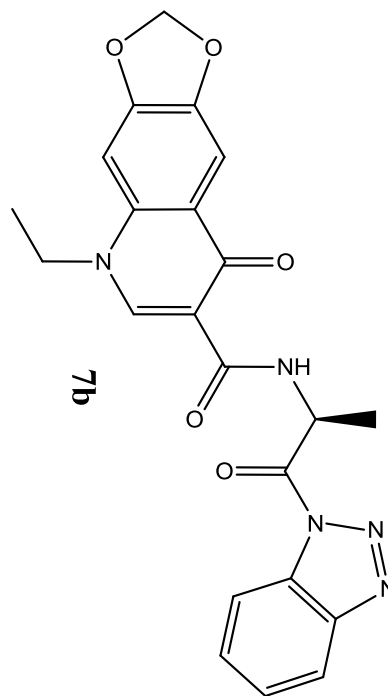

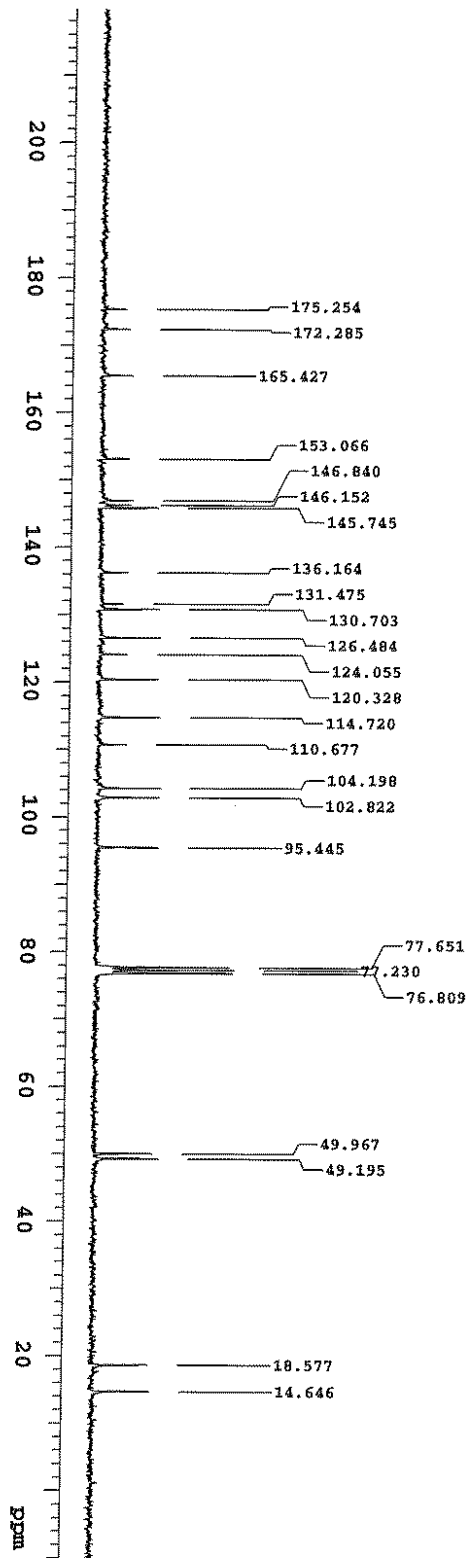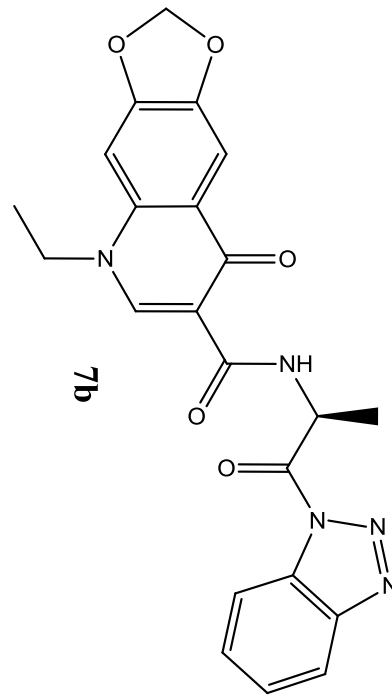

# Full mass spectrum

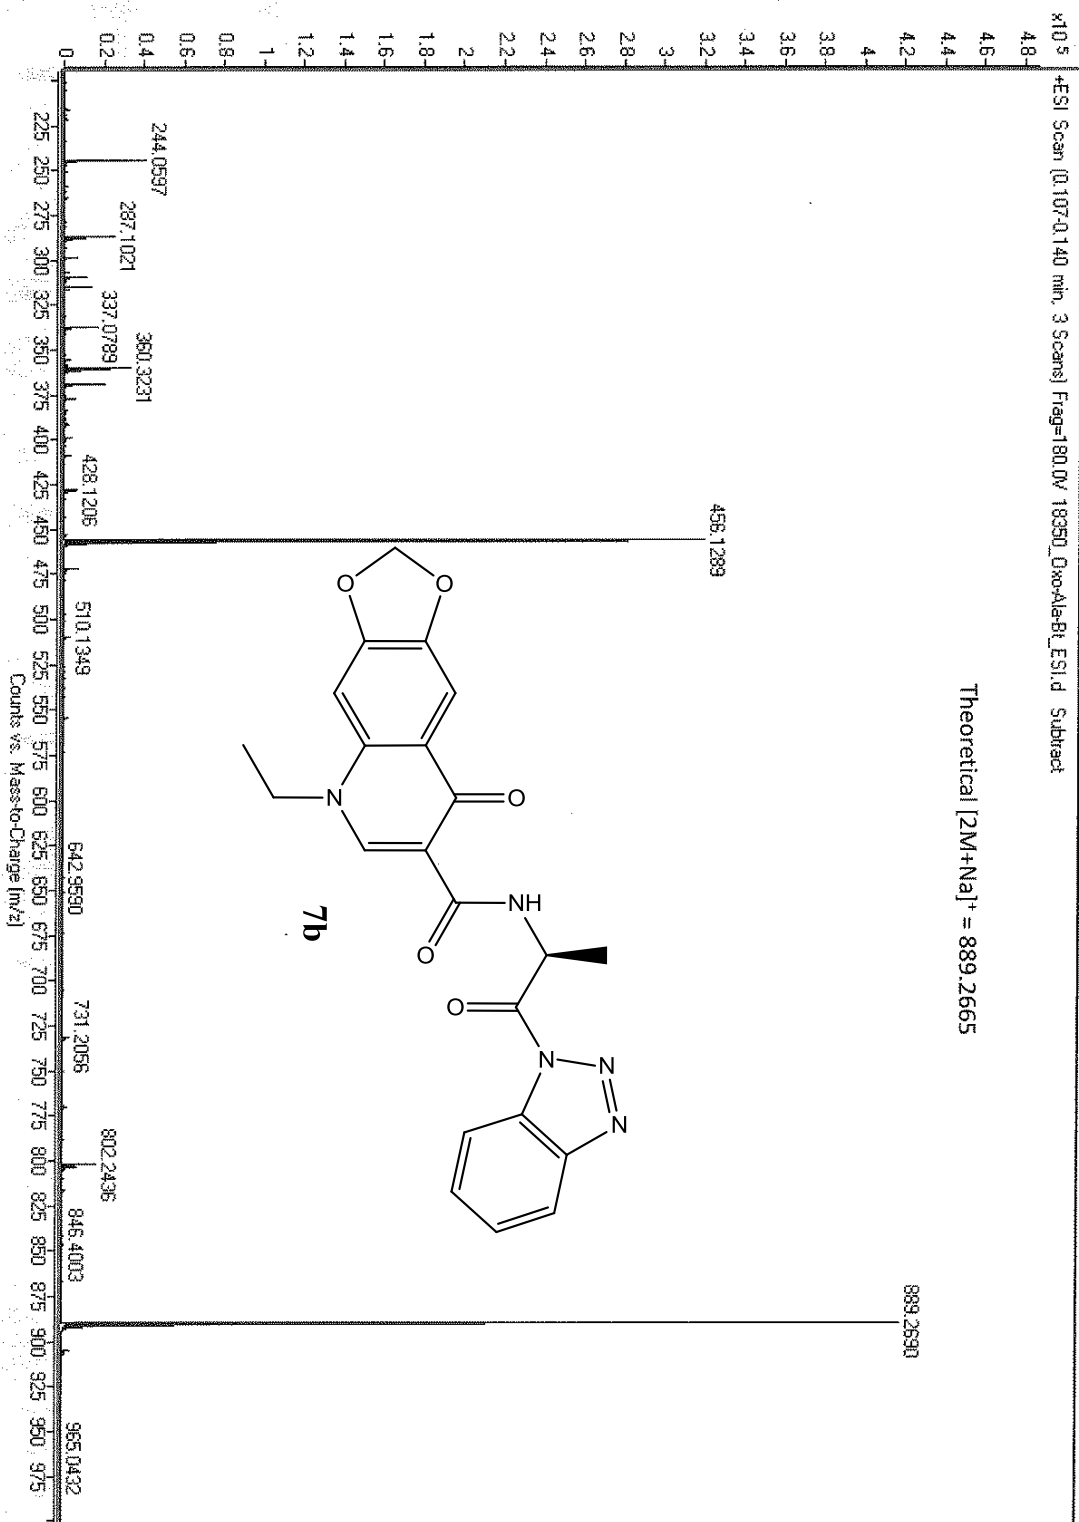

### Zoom-In View

CB

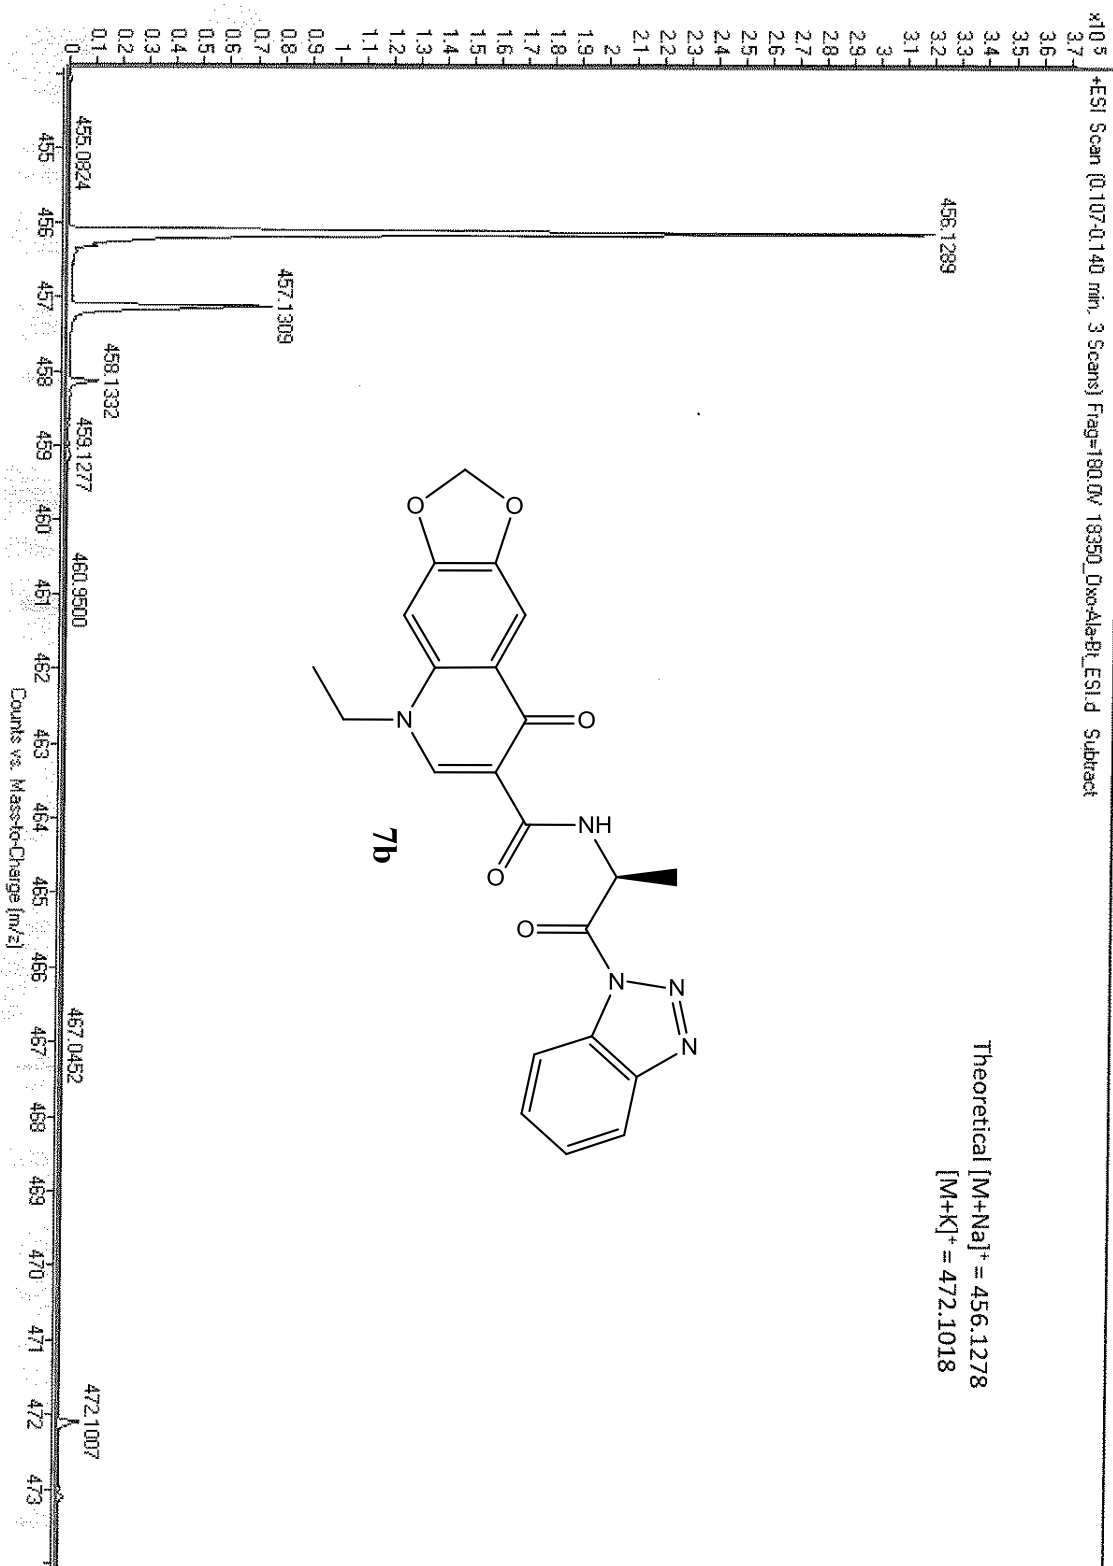



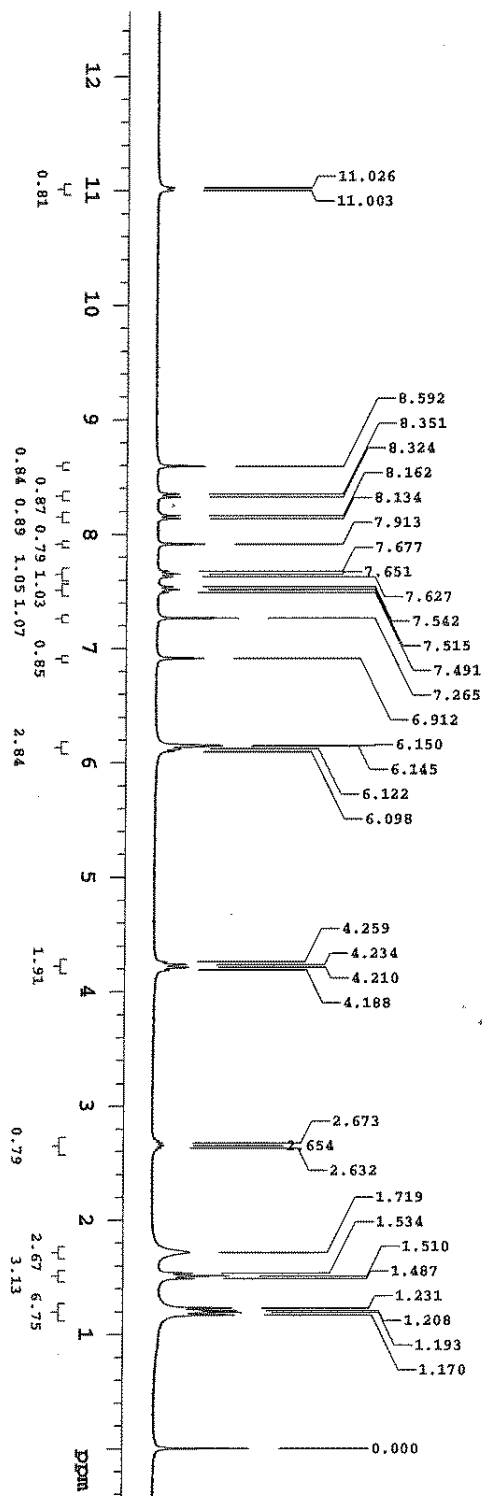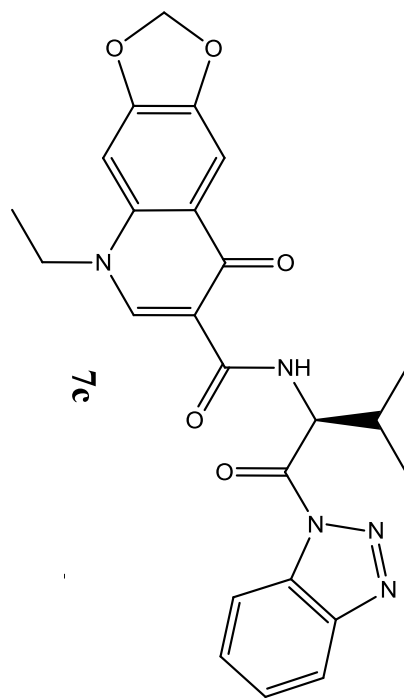

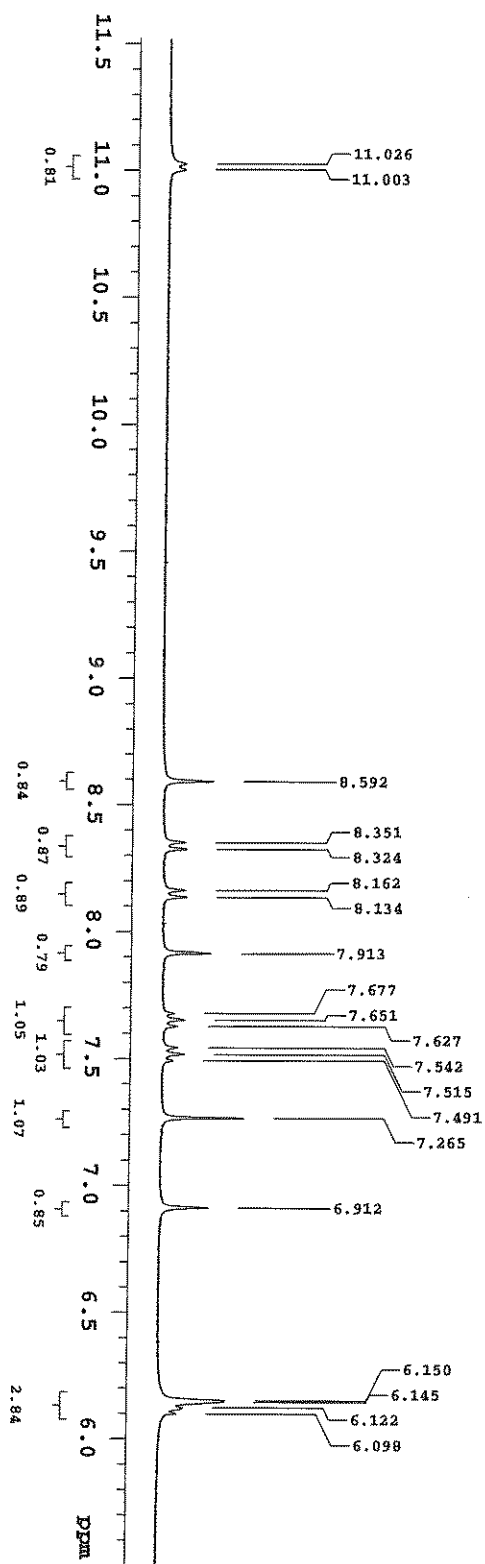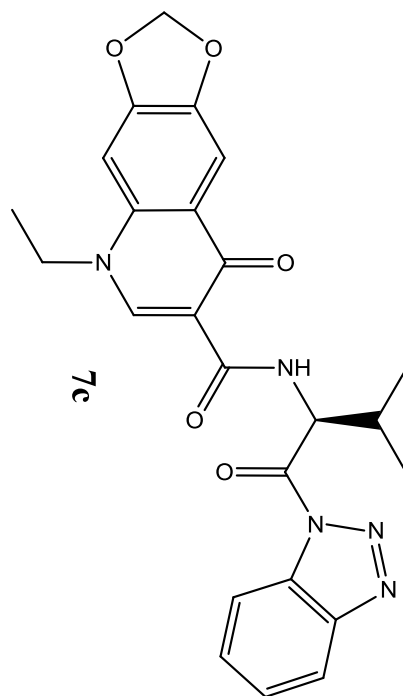

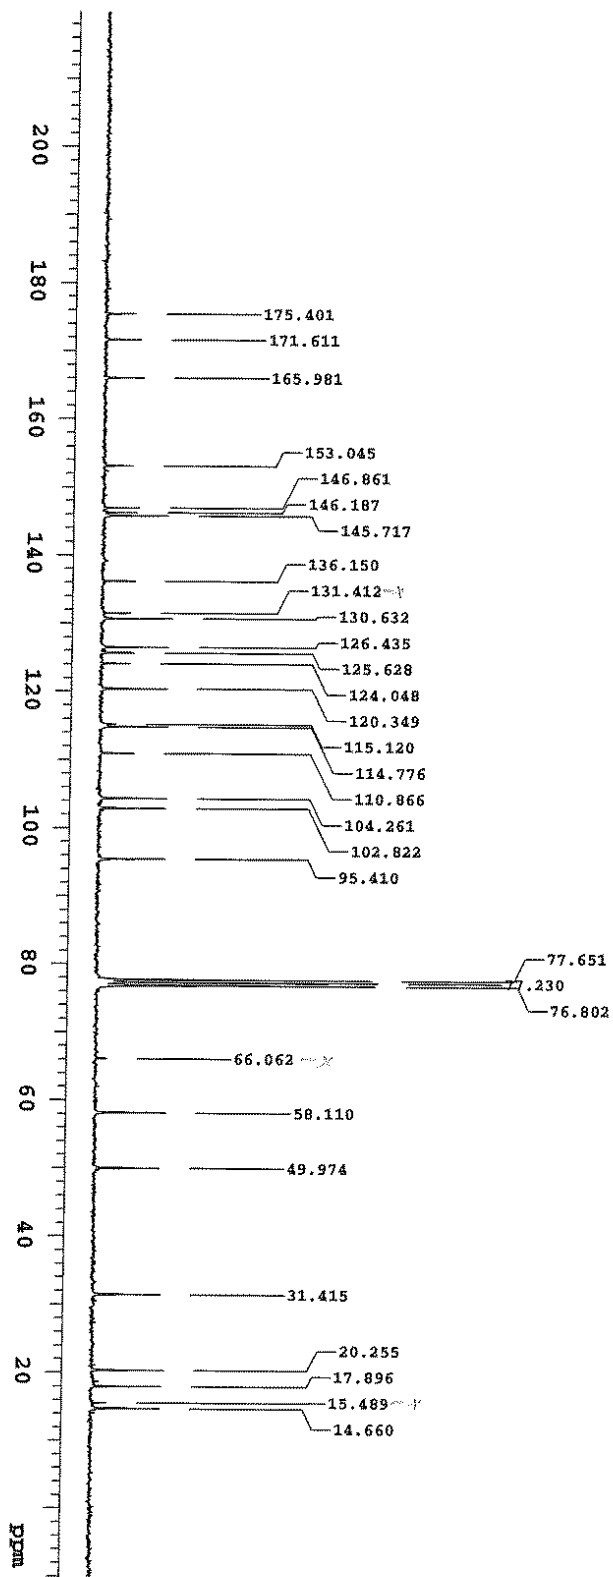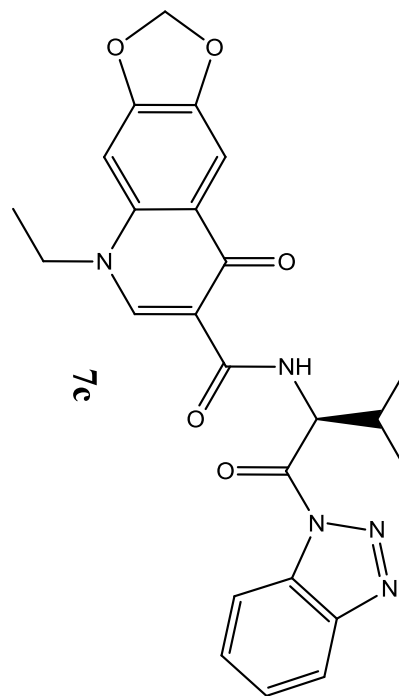

## Full mass spectrum

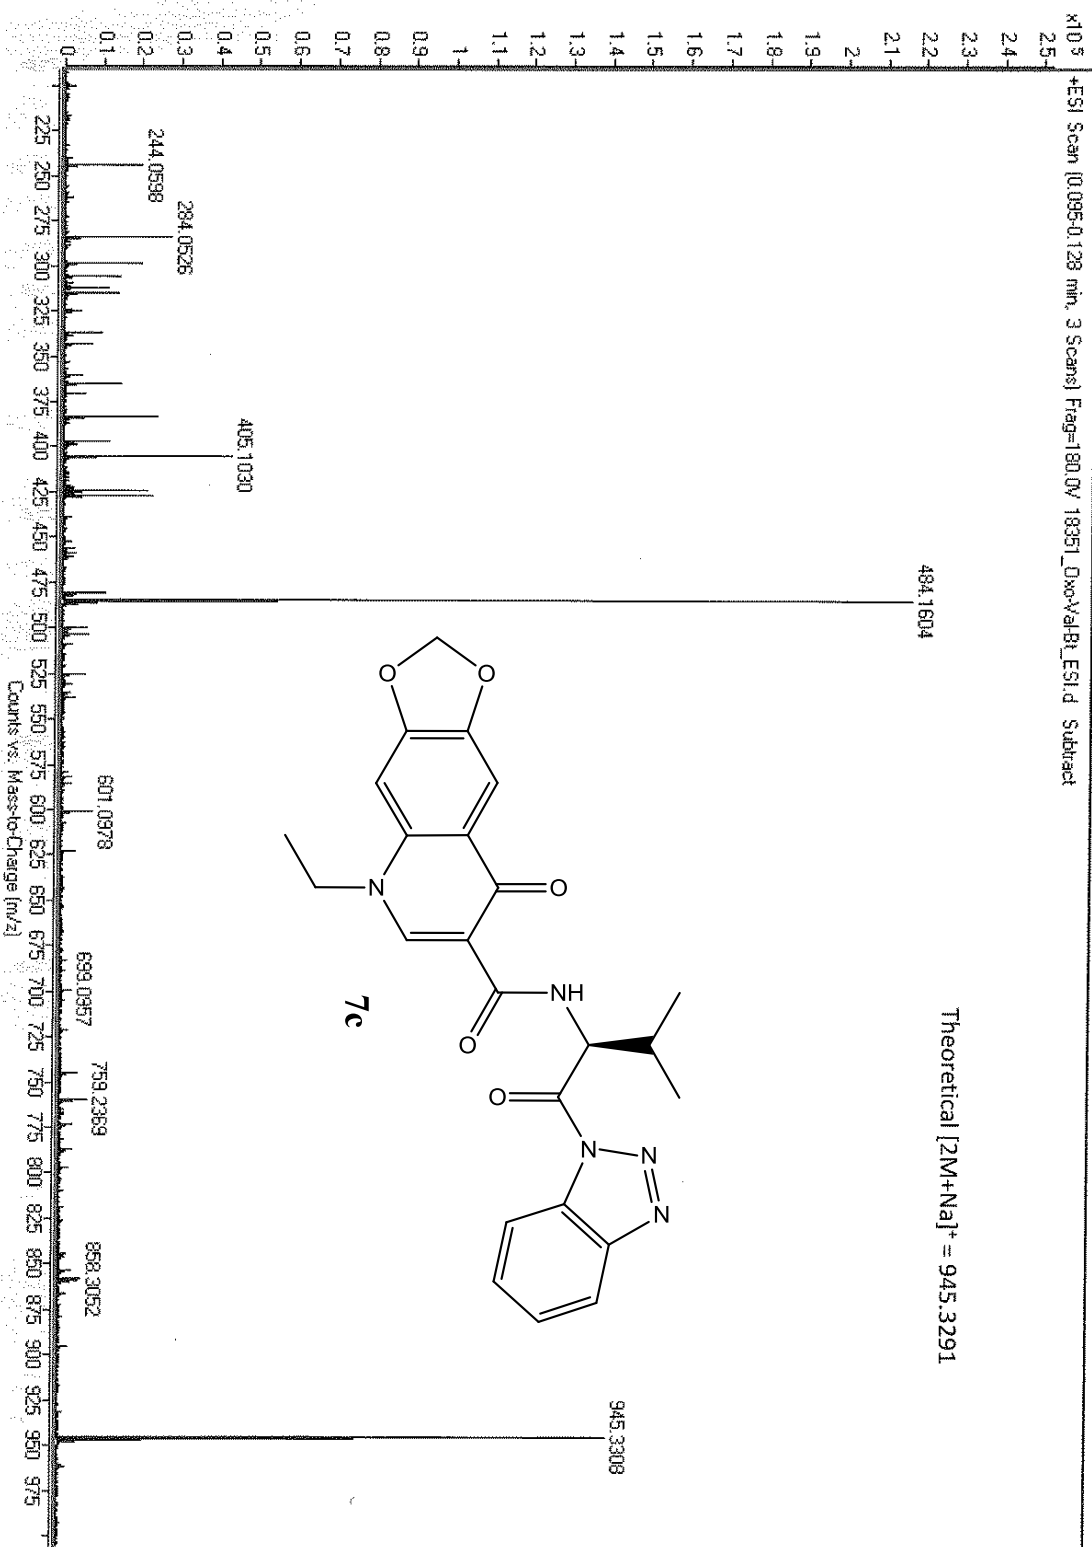





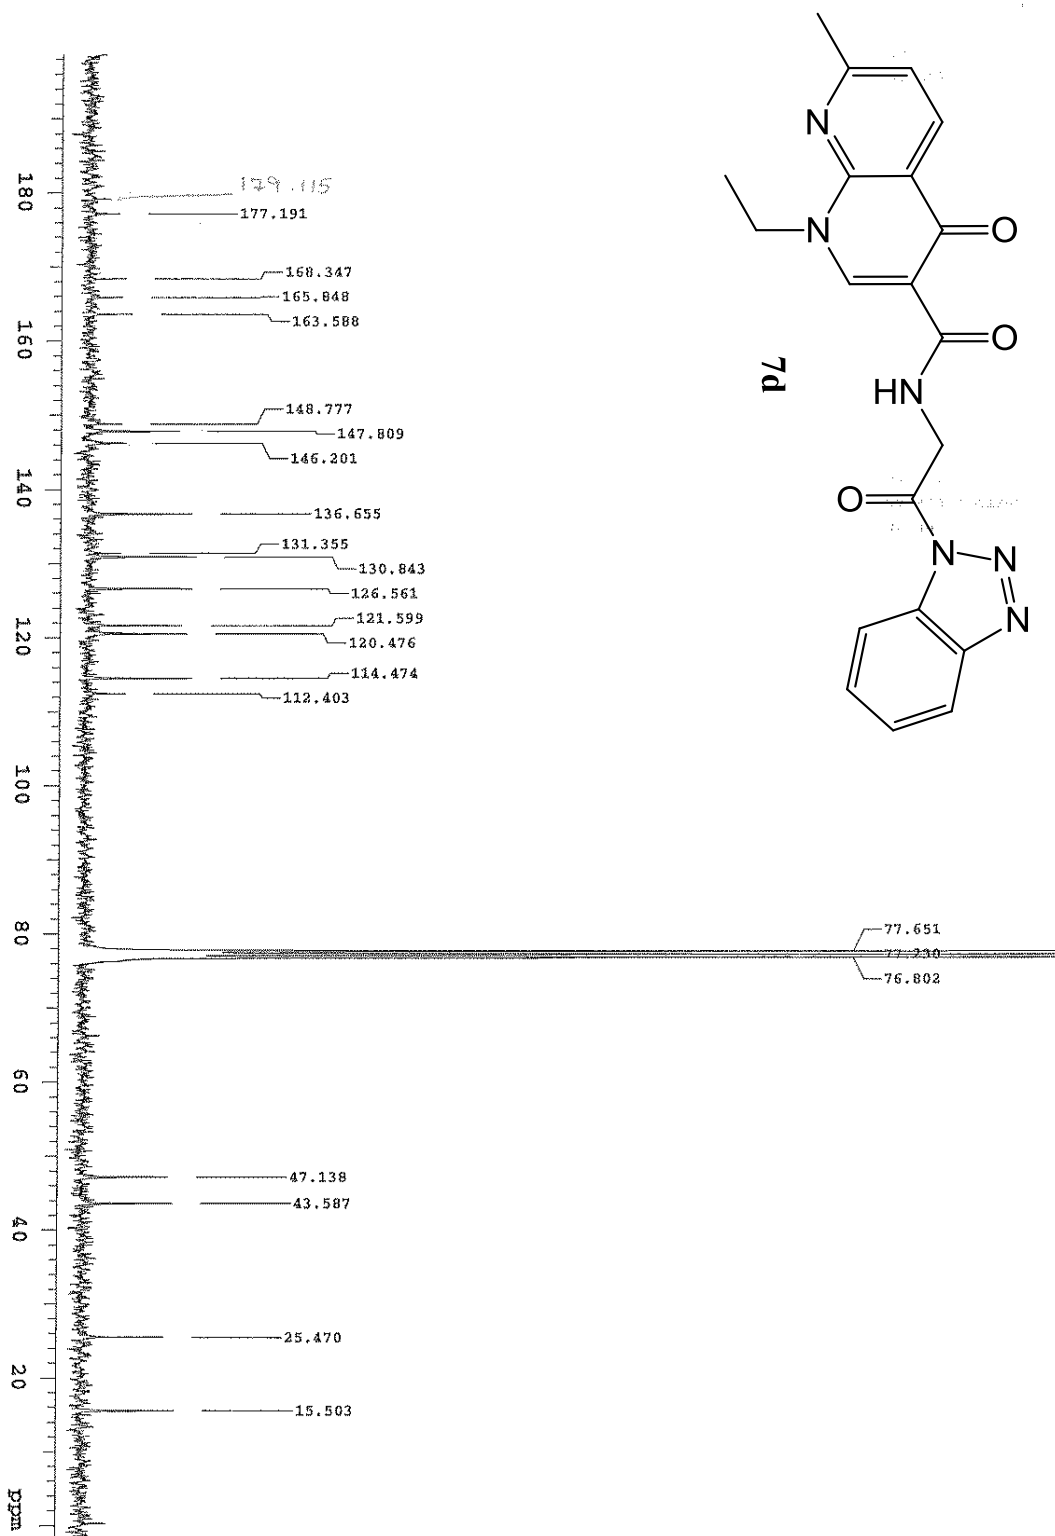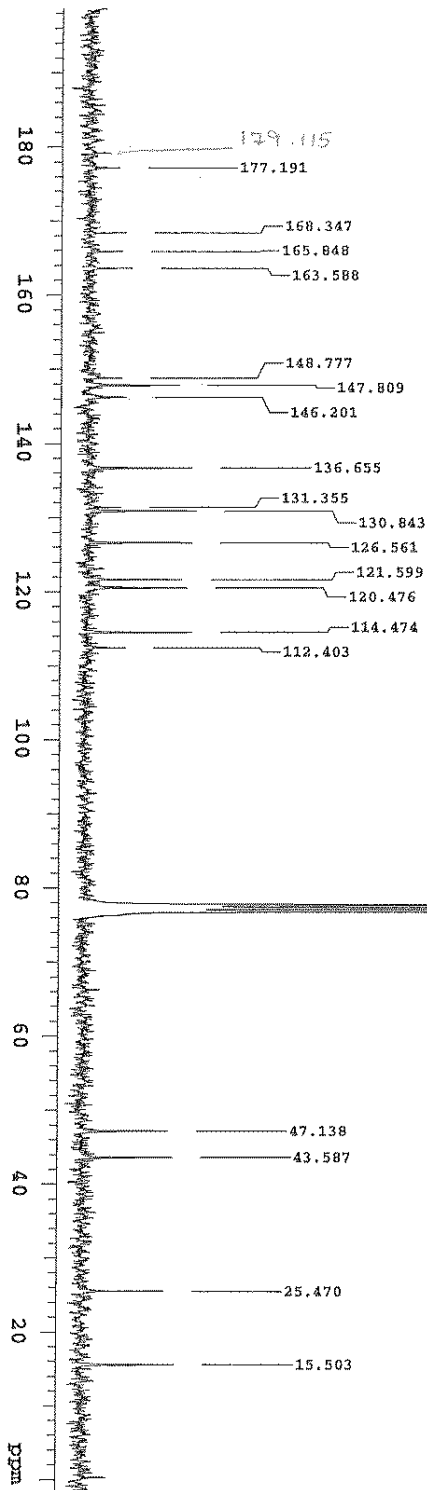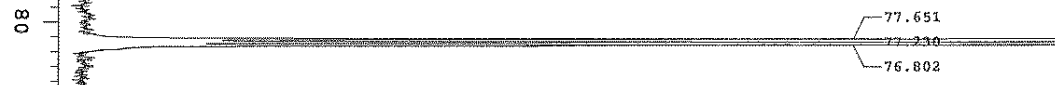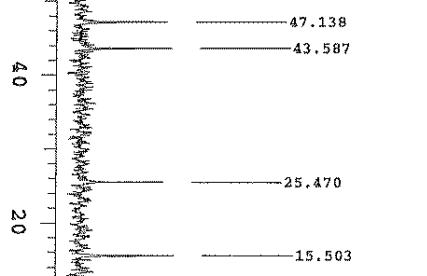

6d

EAGER 200 Stripchart

Sample Ident. : 19 NGB                      Filename : 267019  
 Analysed : 02-10-12 08:22:11           Printed : 02-10-2012 08:32:14

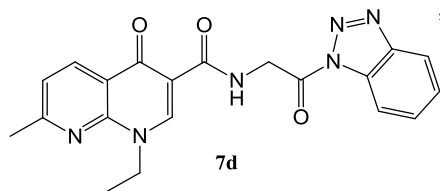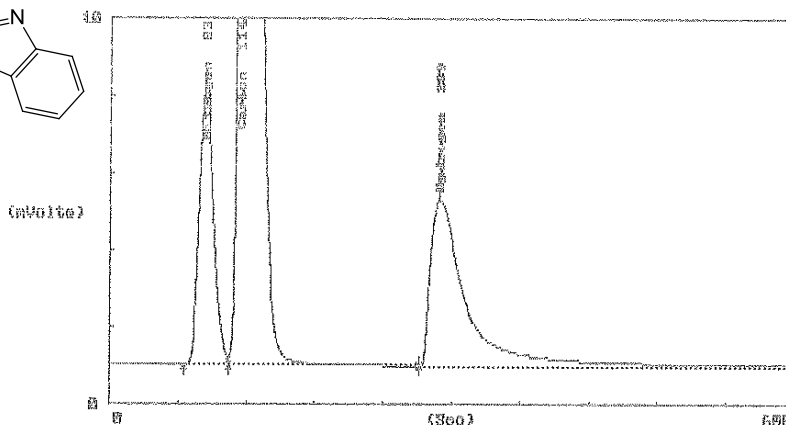

EAGER 200 Peak Integration Report

Instrument name : Instrument #1                      Bline drift (fV):-4.7  
 Company Name : U of Florida                      Operator Ident. : KOU  
 Analysed : 02-10-12 08:22:11                      Printed : 02-10-2012 08:32:14  
 Sample Ident. : 19 NGB                              Filename : 267019  
 Sample Weight : 2.115                              Calc.method: using 'K. Factors'

| No. (#) | Type | Start (Sec) | End (Sec) | Ret Time (Sec) | Height (fV) | Area (fV*Sec) | Area % (%) | Name     |
|---------|------|-------------|-----------|----------------|-------------|---------------|------------|----------|
| 1       | FU   | 65          | 104       | 83             | 7263.9      | 98884         | 9.52       | Nitrogen |
| 2       | FU   | 104         | 271       | 114            | 51093.1     | 782265        | 75.28      | Carbon   |
| 3       | RS   | 271         | 598       | 289            | 4286.6      | 158011        | 15.21      | Hydrogen |
|         |      |             |           |                |             |               | 1039160    | 100.00   |

EAGER 200 Unk Report

Instrument name : Instrument #1                      Bline drift (fV):-4.7  
 Company Name : U of Florida                      Operator Ident. : KOU  
 Analysed : 02-10-12 08:22:11                      Printed : 02-10-2012 08:32:14  
 Sample Ident. : 19 NGB                              Filename : 267019  
 Sample Weight : 2.115                              Calc.method: using 'K. Factors'

| Pk. (#) | Ret Time (Sec) | Area (fV*Sec) | Element % (%) | Area Ratio  | Name     |
|---------|----------------|---------------|---------------|-------------|----------|
| 1       | 83             | 98884         | 21.254        | .791093E+01 | Nitrogen |
| 2       | 114            | 782265        | 61.160        | .100000E+01 | Carbon   |
| 3       | 289            | 158011        | 4.653         | .495069E+01 | Hydrogen |



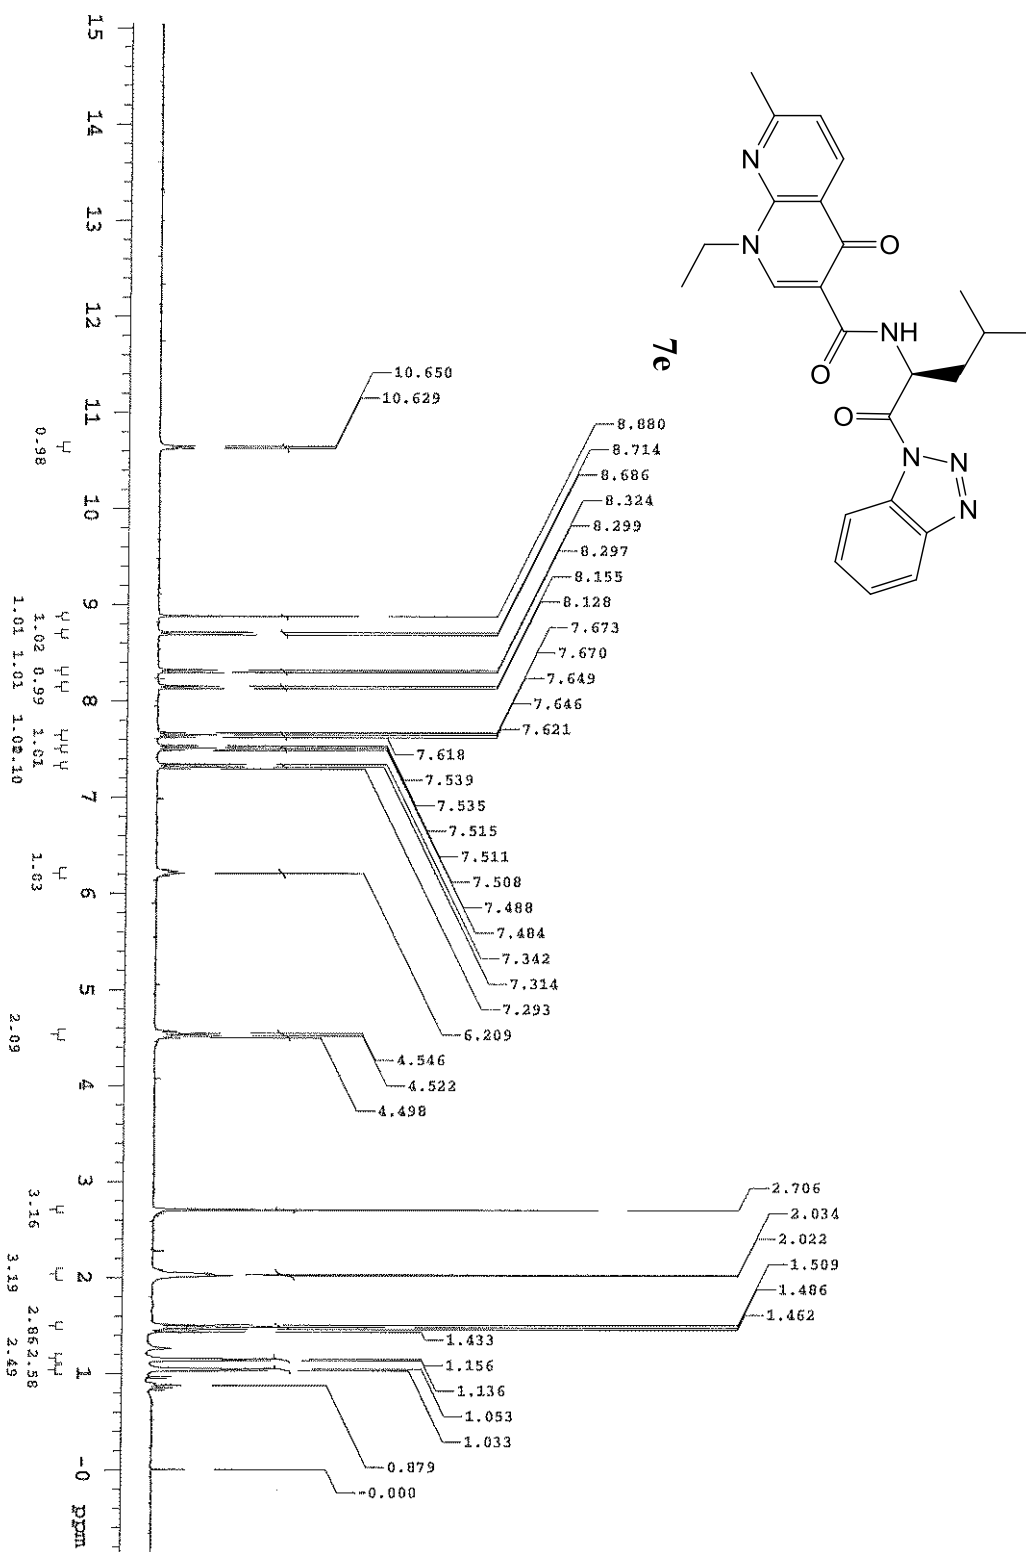

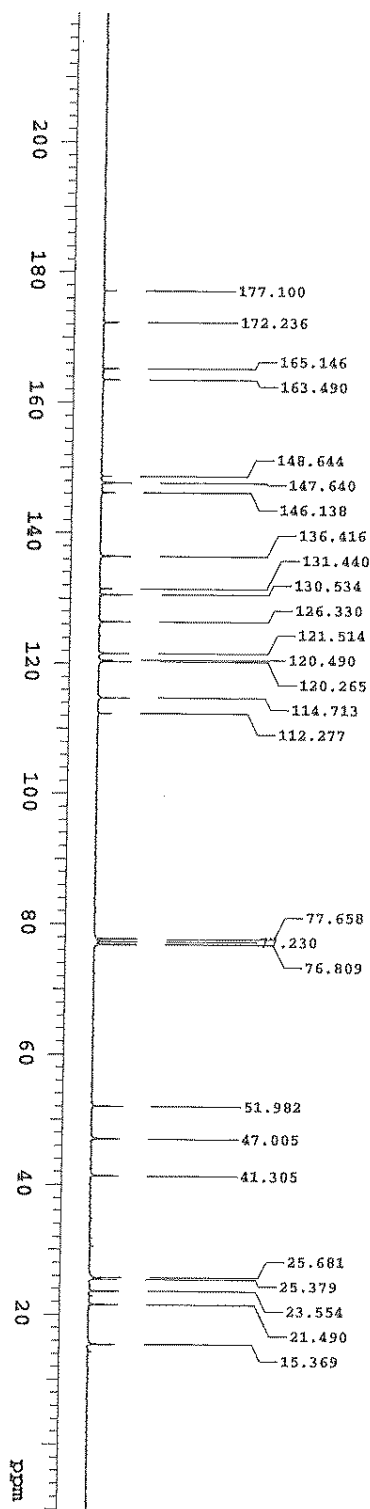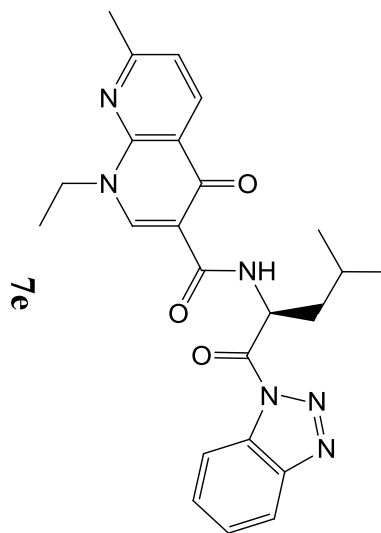

### Full mass spectrum

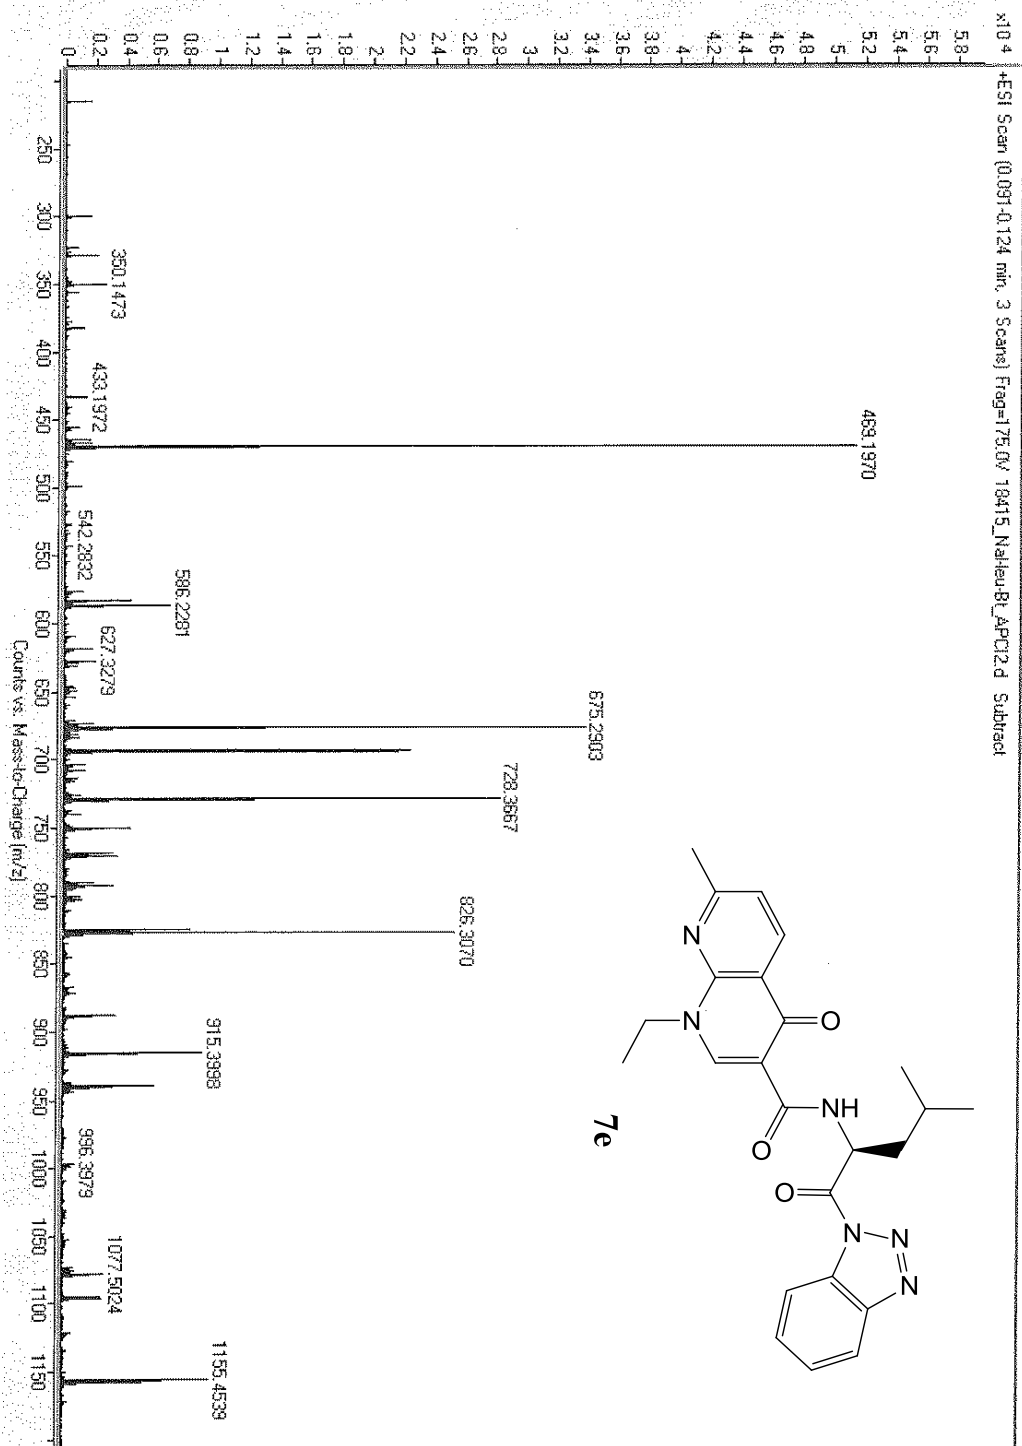

### Zoom-In View

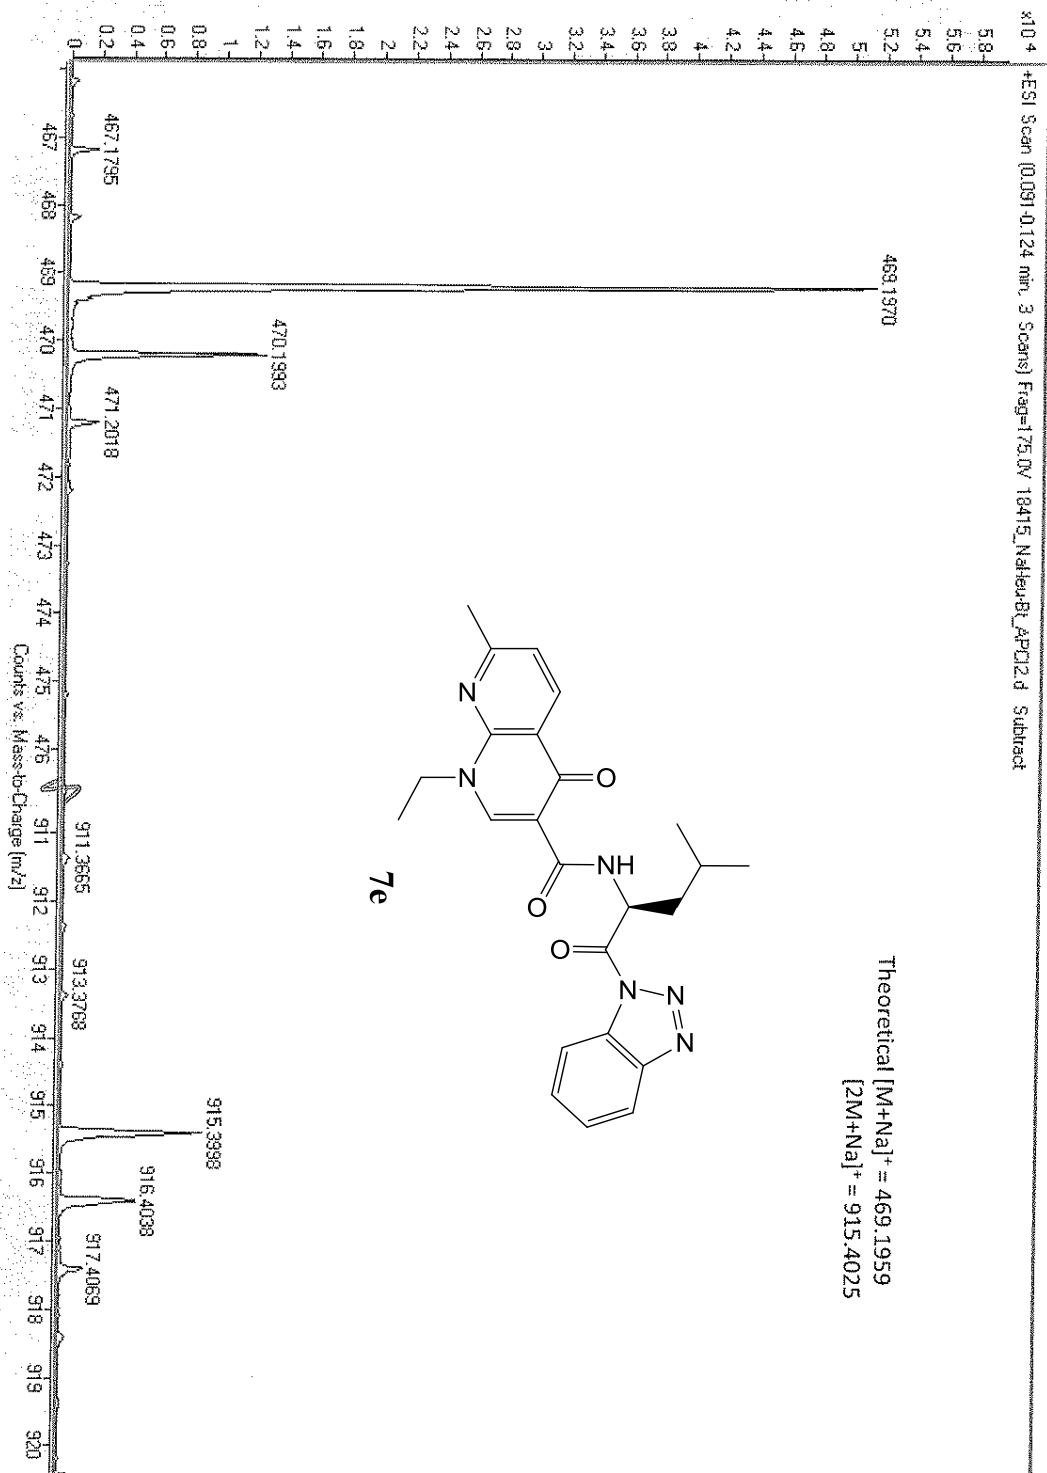

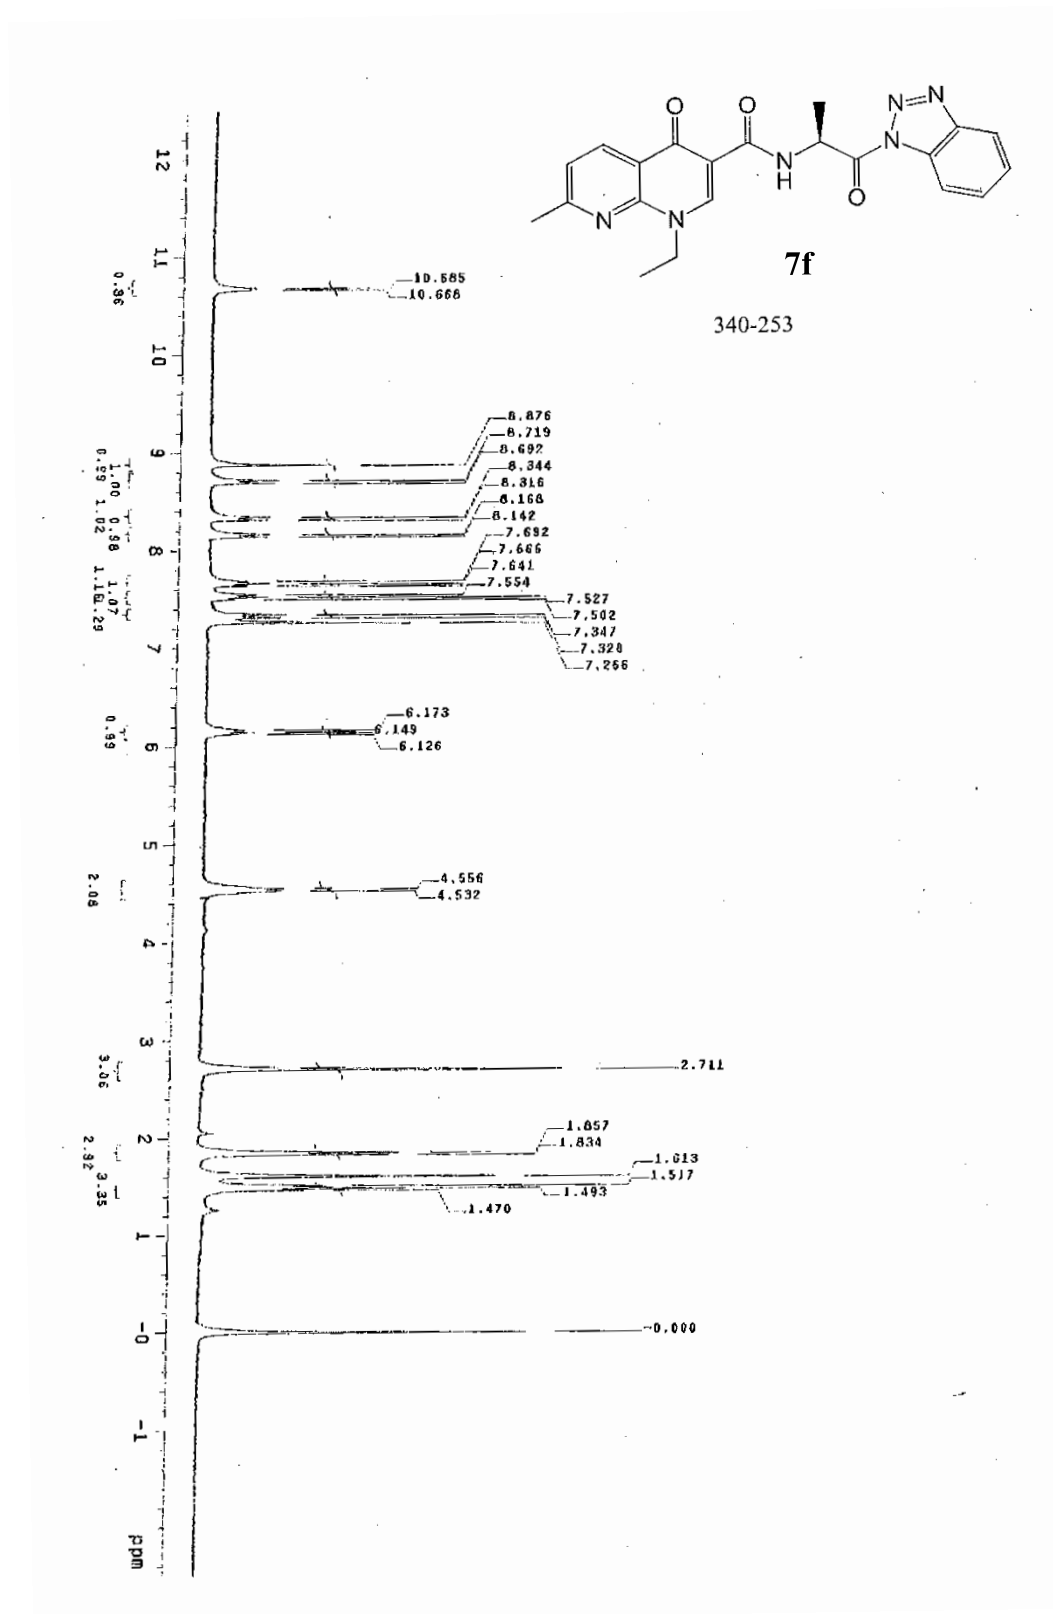

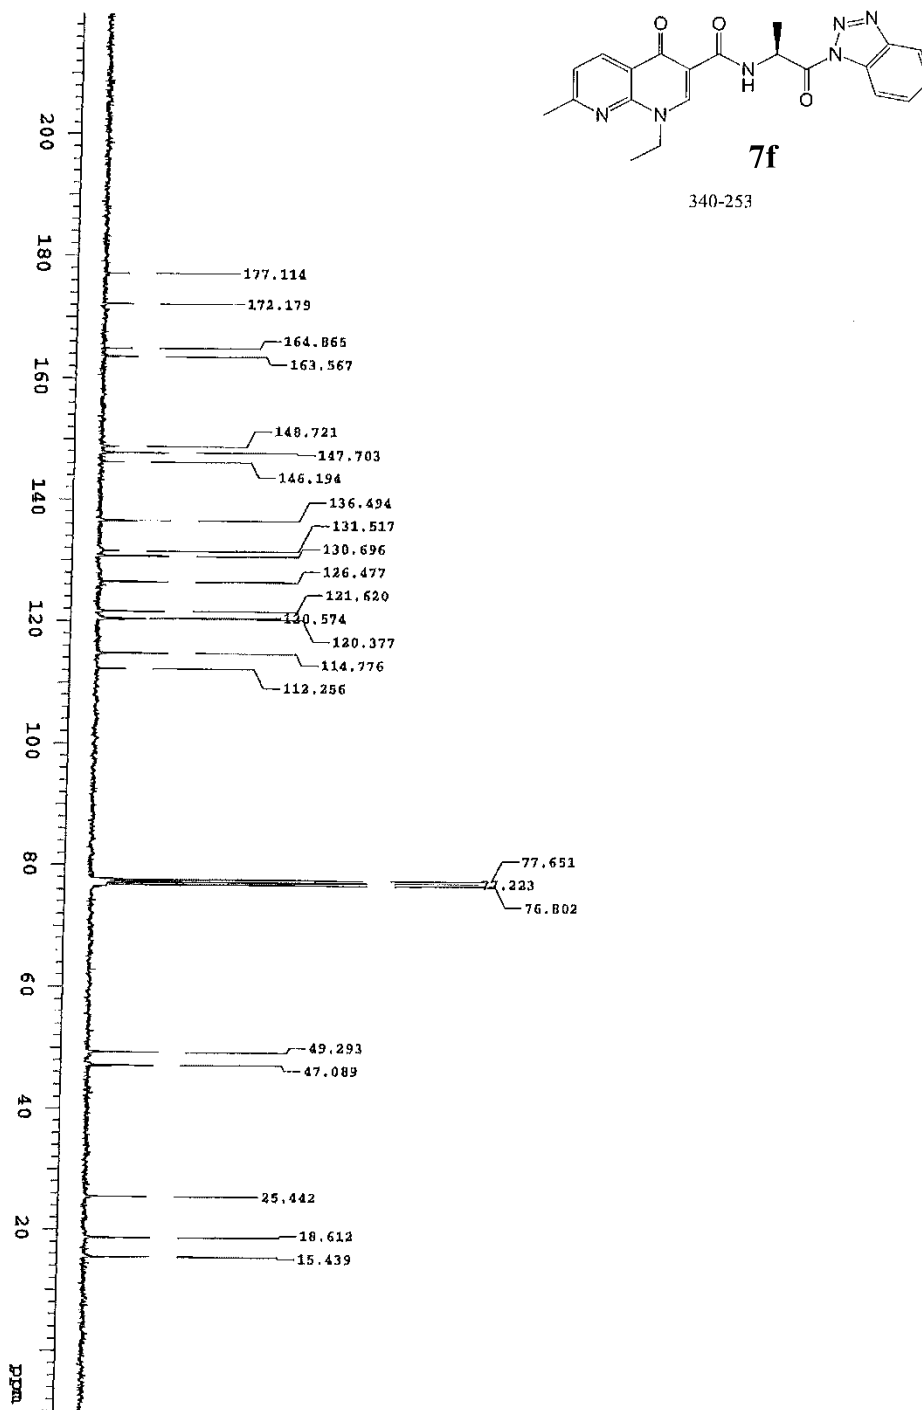

EAGER 200 Stripchart

Sample Ident. : 27 Nal-AB-1      Filename : 265327  
 Analysed : 12-02-11 09:24:28      Printed : 12-02-2011 11:45:16

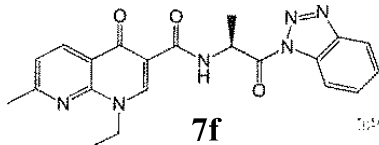

340-253

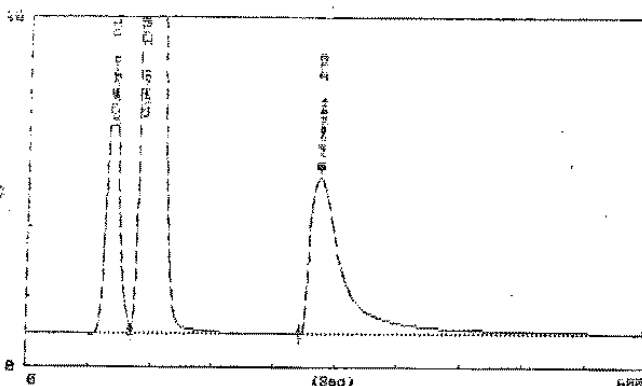

EAGER 200 Peak Integration Report

Instrument name : Instrument #1      Bline drift (fV): 3.7  
 Company Name : U of Florida      Operator Ident. : KOU  
 Analysed : 12-02-11 09:24:28      Printed : 12-02-2011 11:45:16  
 Sample Ident. : 27 Nal-AB-1      Filename : 265327  
 Sample Weight : 2.174      Calc.method: using 'K. Factors'

| No. | Type | Start (s) | End (s) | Ret Time (Sec) | Height (fV) | Area (fV*Sec) | Area % (%) | Name     |  |
|-----|------|-----------|---------|----------------|-------------|---------------|------------|----------|--|
| 1   | 1    | 87        | 131     | 91             | 7090.2      | 25041         | 2.06       | Nitrogen |  |
| 2   | 1    | 101       | 200     | 112            | 53204.5     | 701397        | 74.50      | Carbon   |  |
| 3   | 10   | 100       | 596     | 200            | 4430.0      | 172000        | 16.41      | Hydrogen |  |
|     |      |           |         |                |             |               | 1043408    | 100.00   |  |

EAGER 200 Unk Report

Instrument name : Instrument #1      Bline drift (fV): 3.7  
 Company Name : U of Florida      Operator Ident. : KOU  
 Analysed : 12-02-11 09:24:28      Printed : 12-02-2011 11:45:16  
 Sample Ident. : 27 Nal-AB-1      Filename : 265327  
 Sample Weight : 2.174      Calc.method: using 'K. Factors'

| Pk. (#) | Ret Time (Sec) | Area (fV*Sec) | Element % (%) | Area Ratio  | Name     |
|---------|----------------|---------------|---------------|-------------|----------|
| 1       | 91             | 25041         | 20.667        | .022171E+01 | Nitrogen |
| 2       | 112            | 701397        | 62.029        | .100000E+01 | Carbon   |
| 3       | 200            | 172000        | 5.015         | .454221E+01 | Hydrogen |

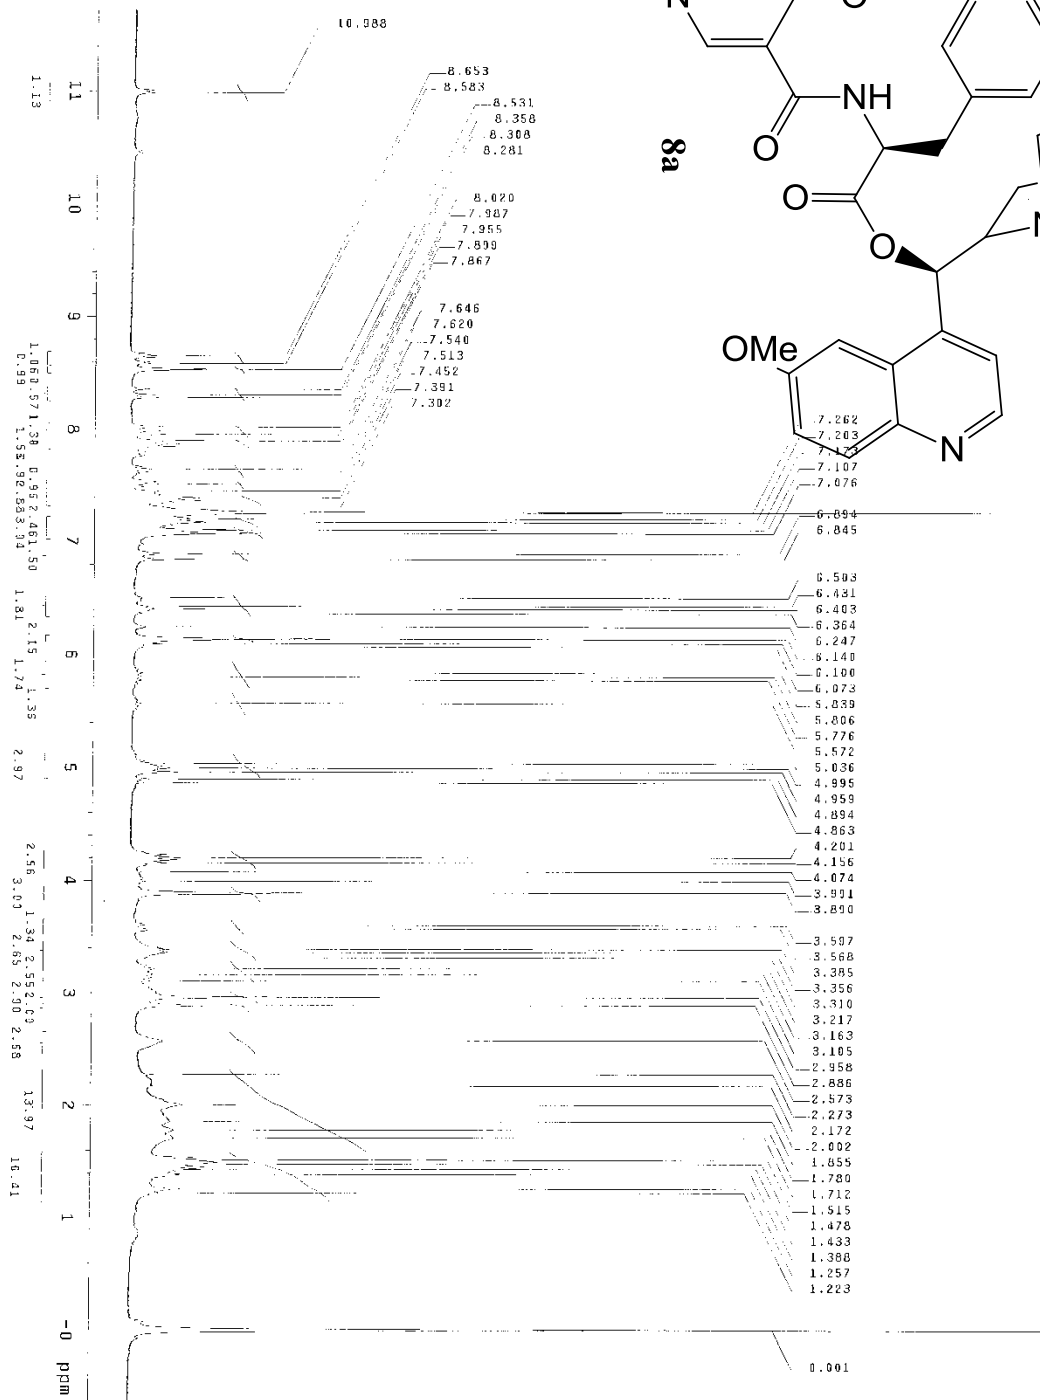



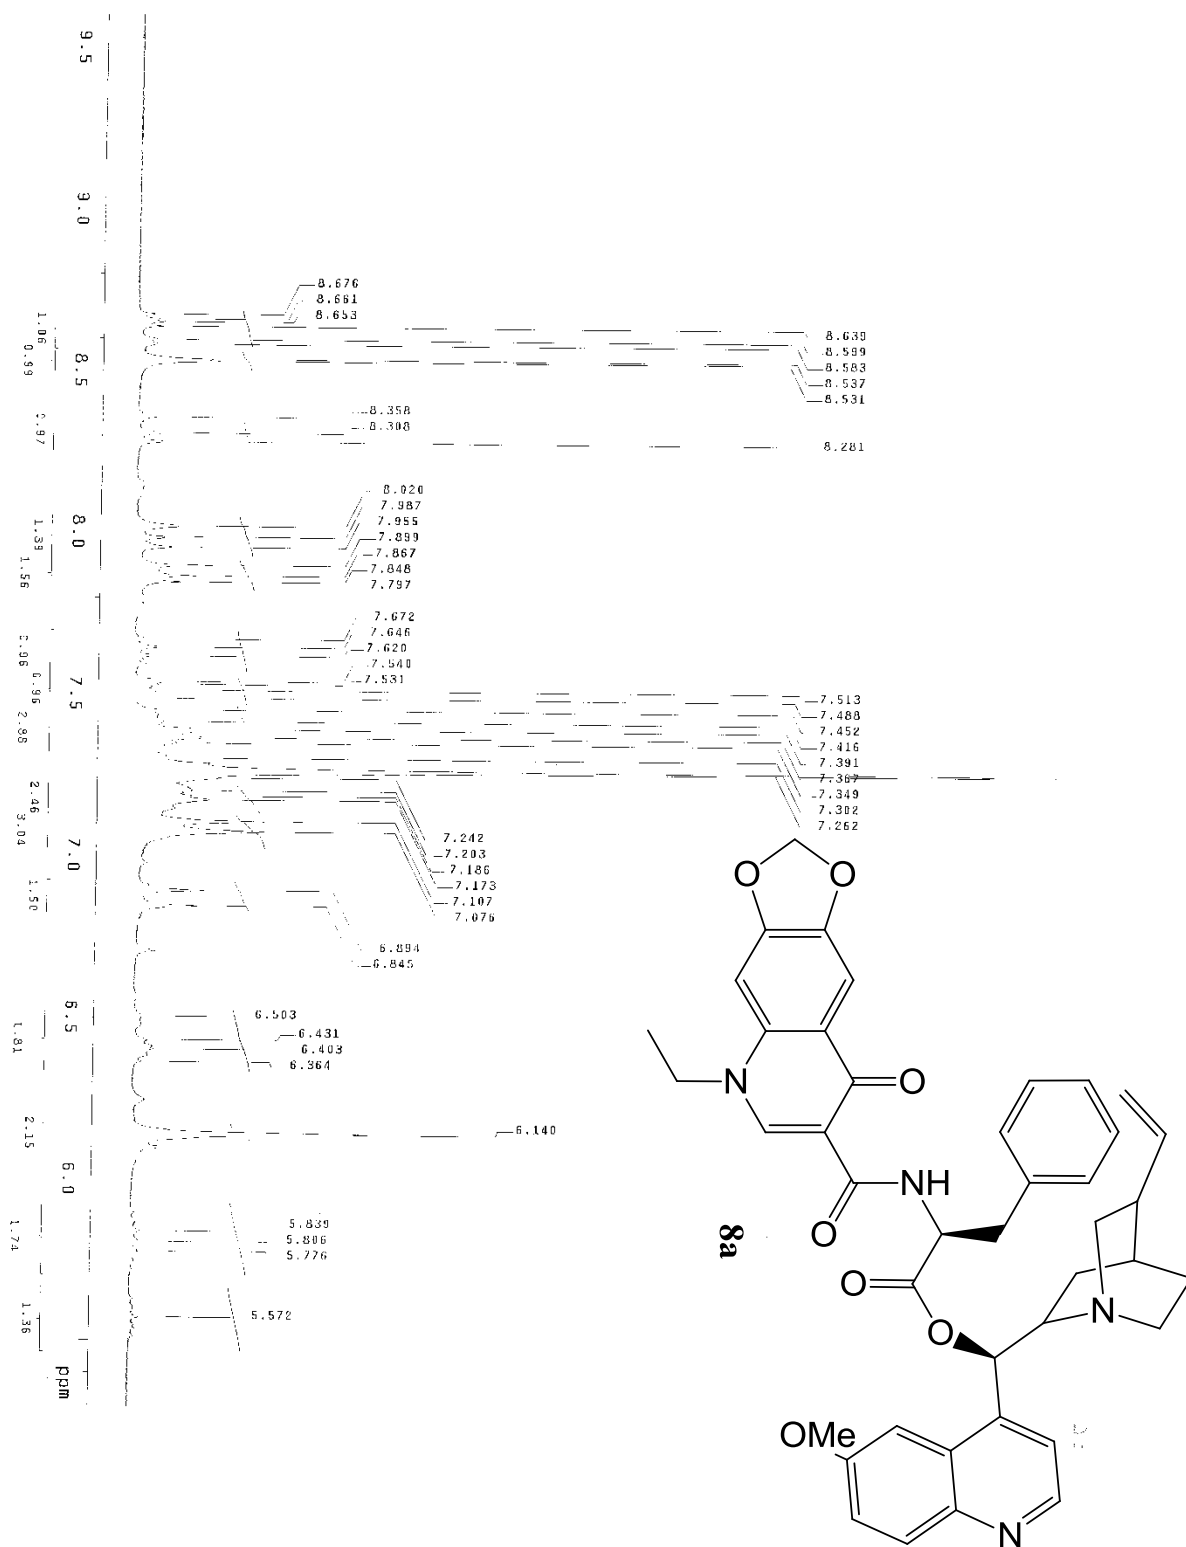

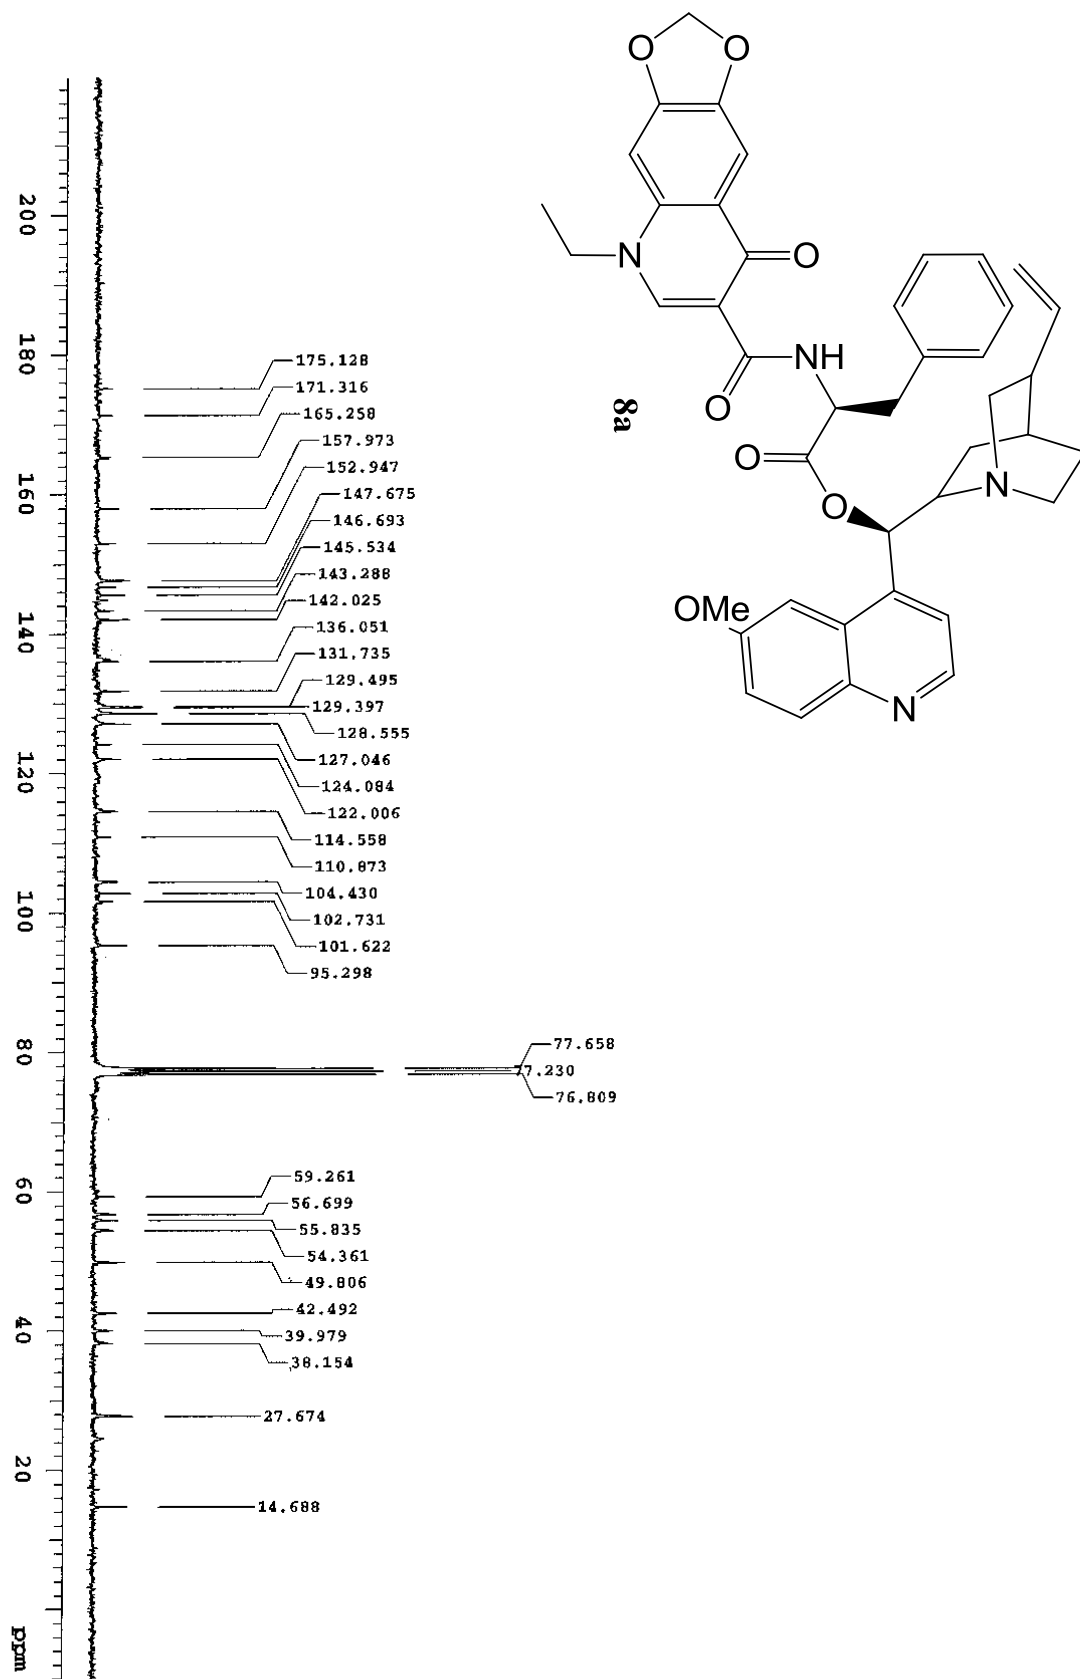

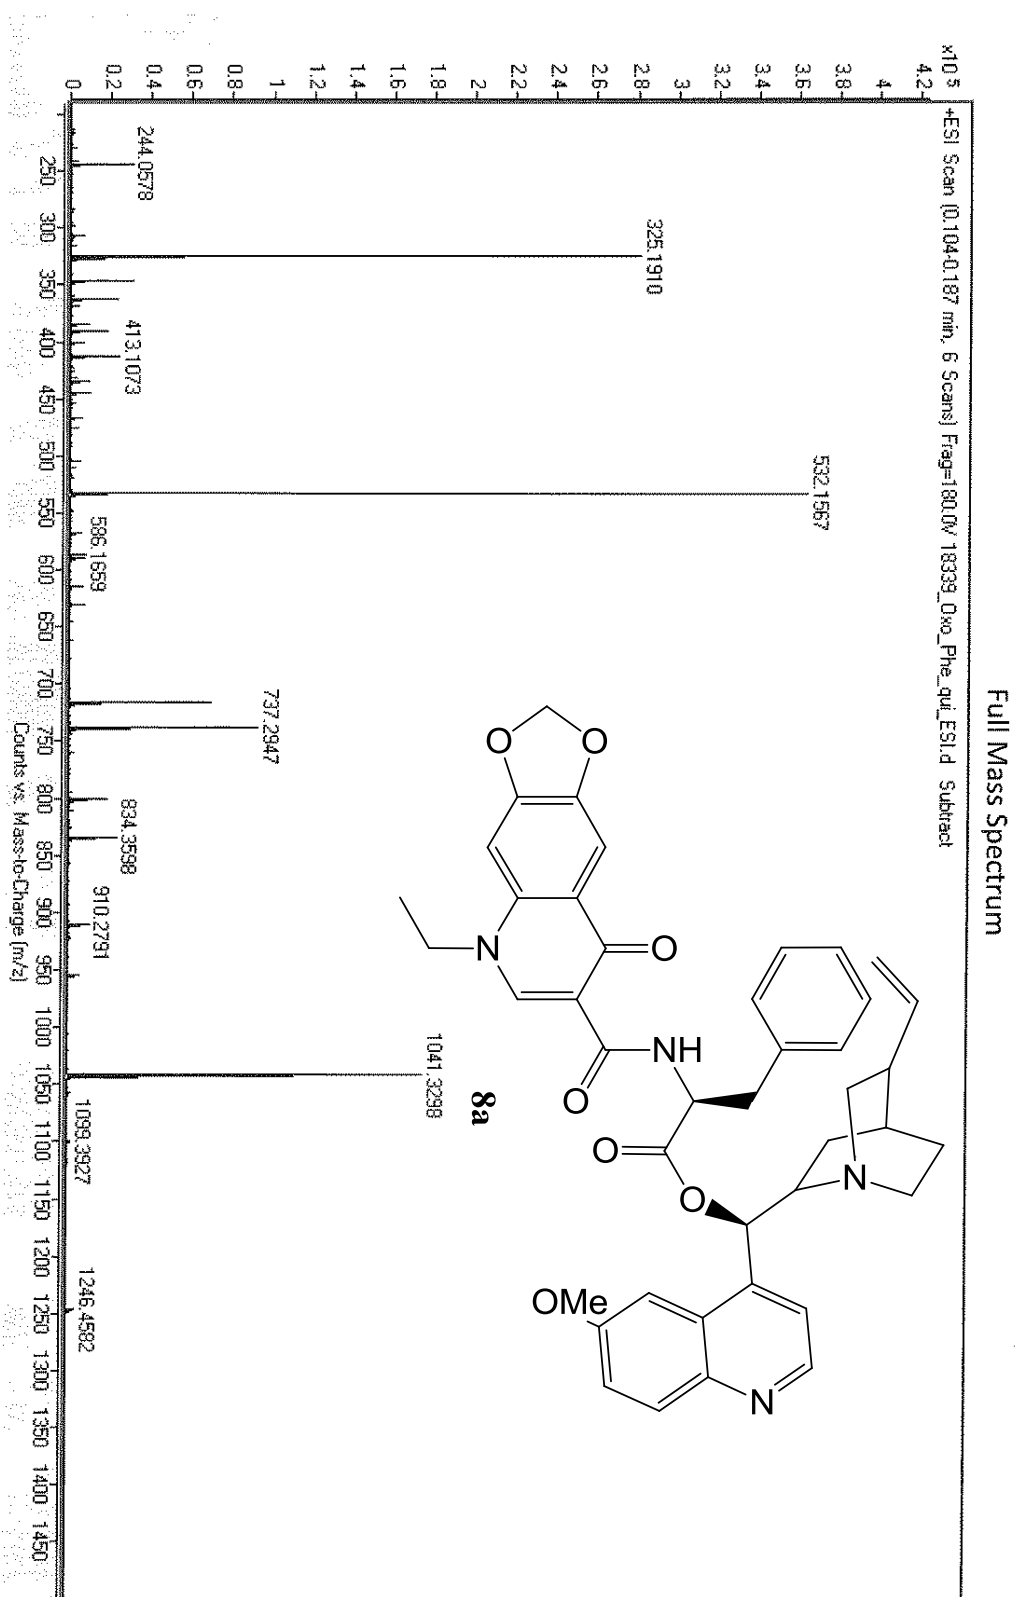

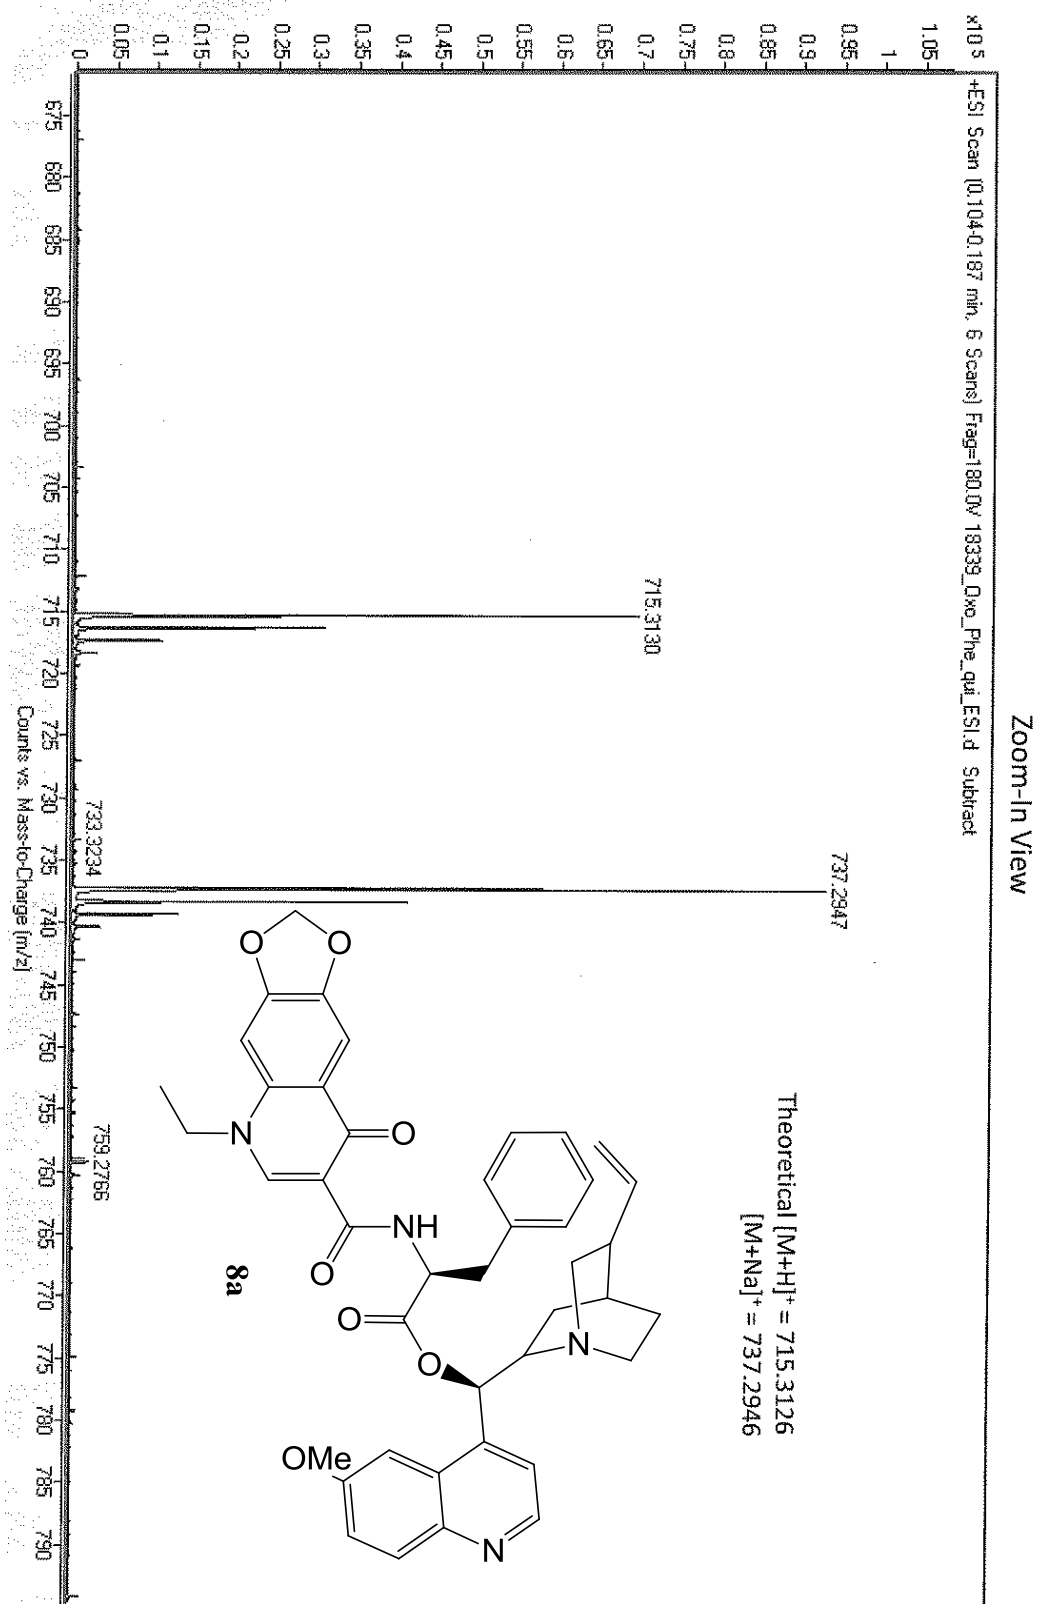

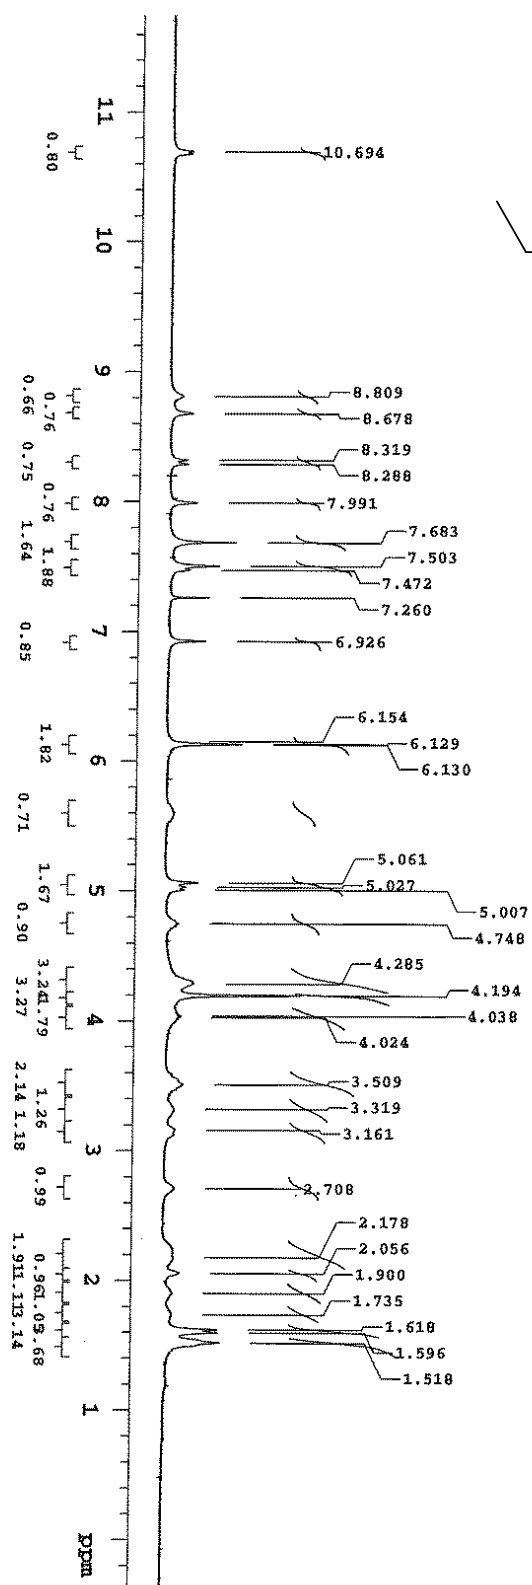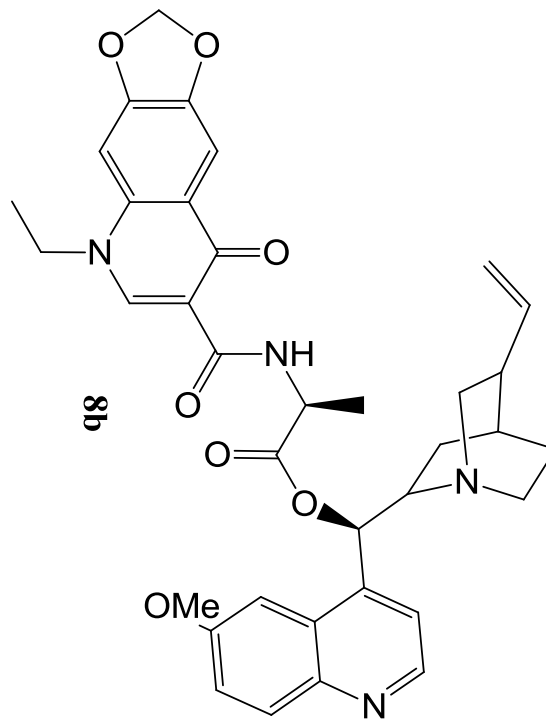

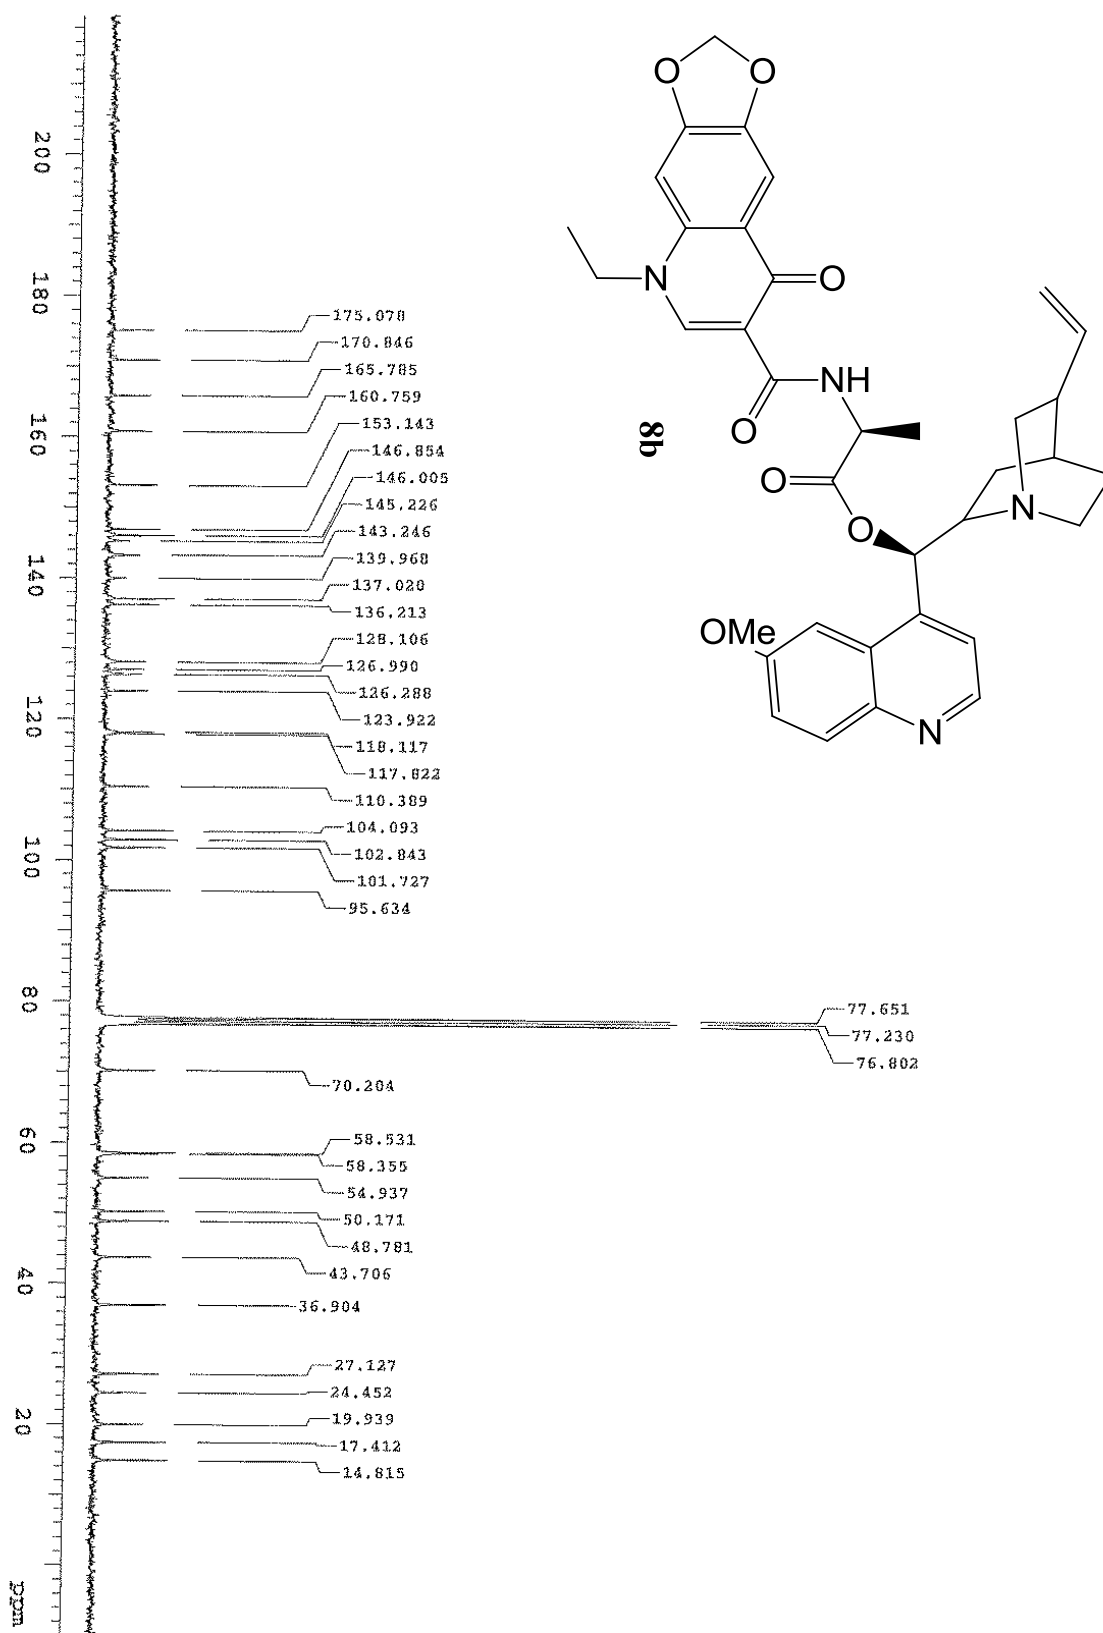

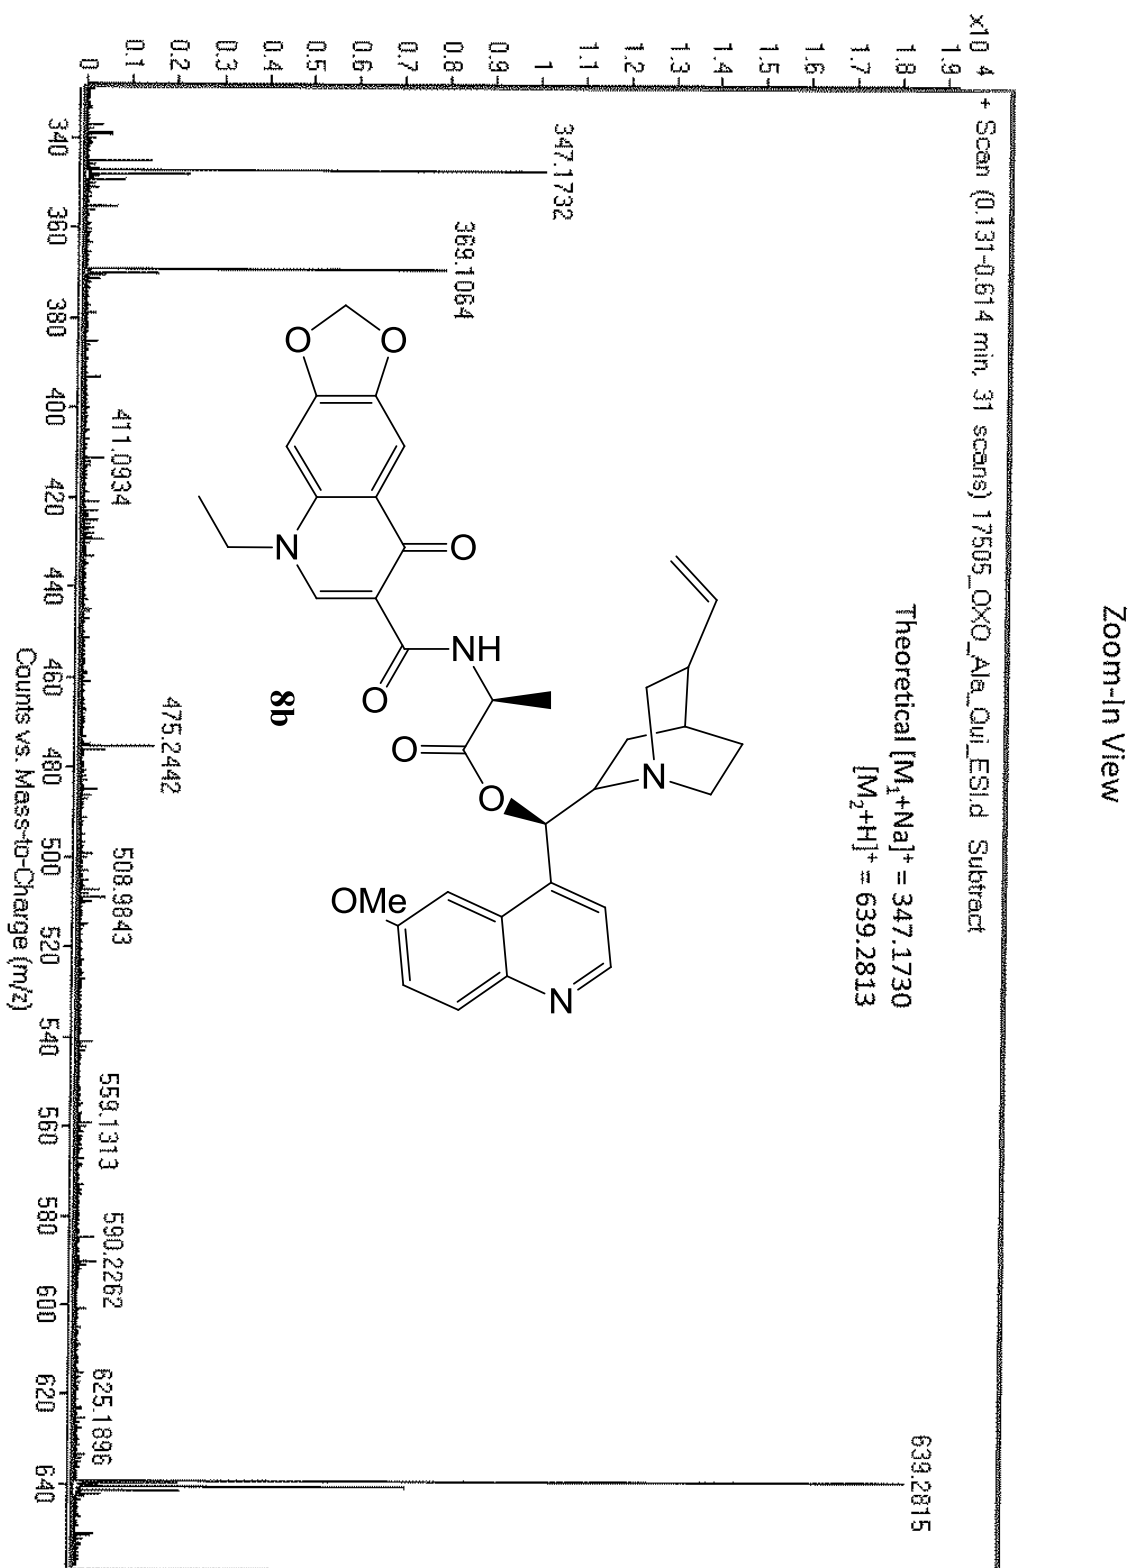

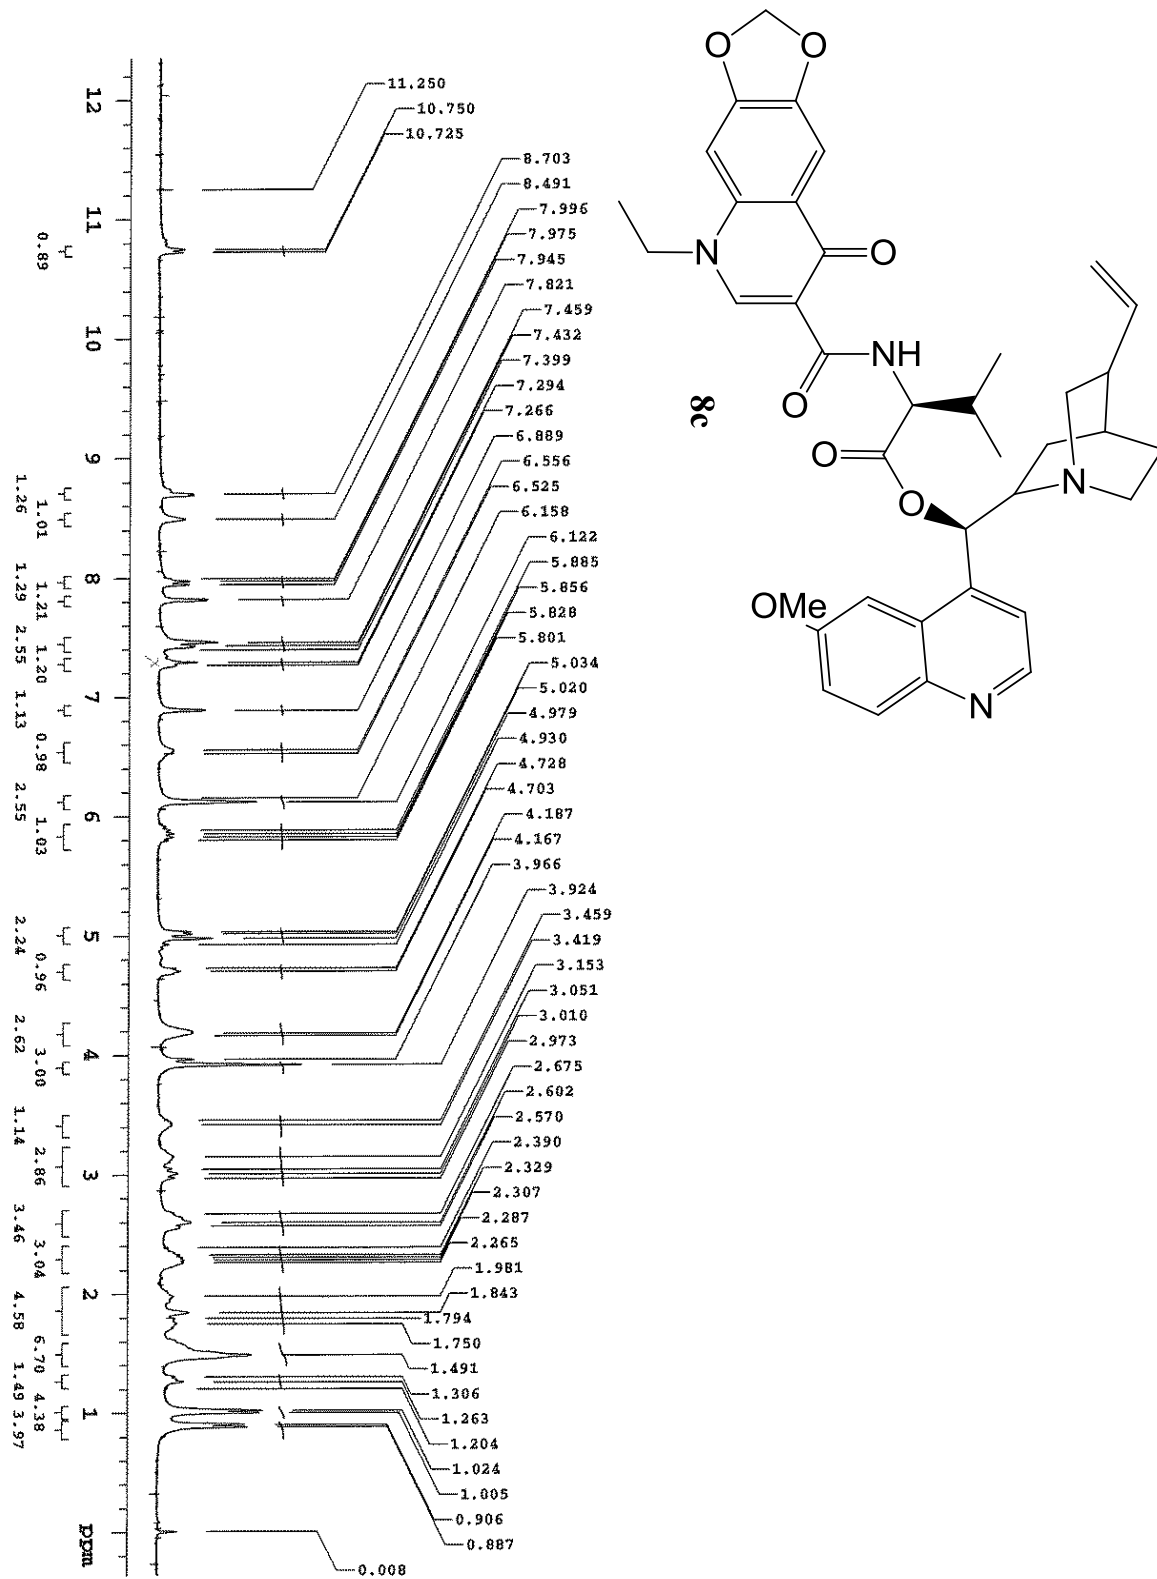



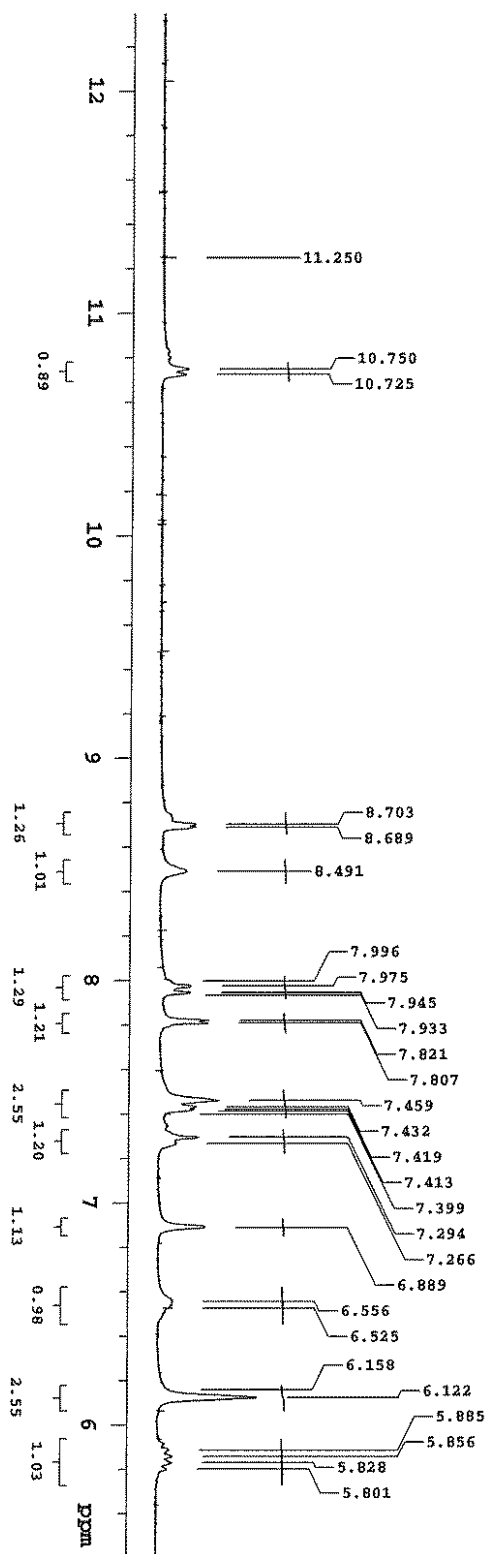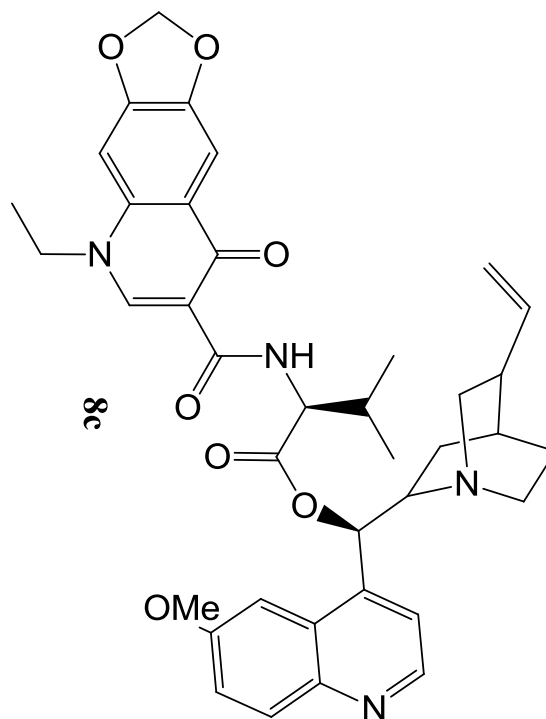

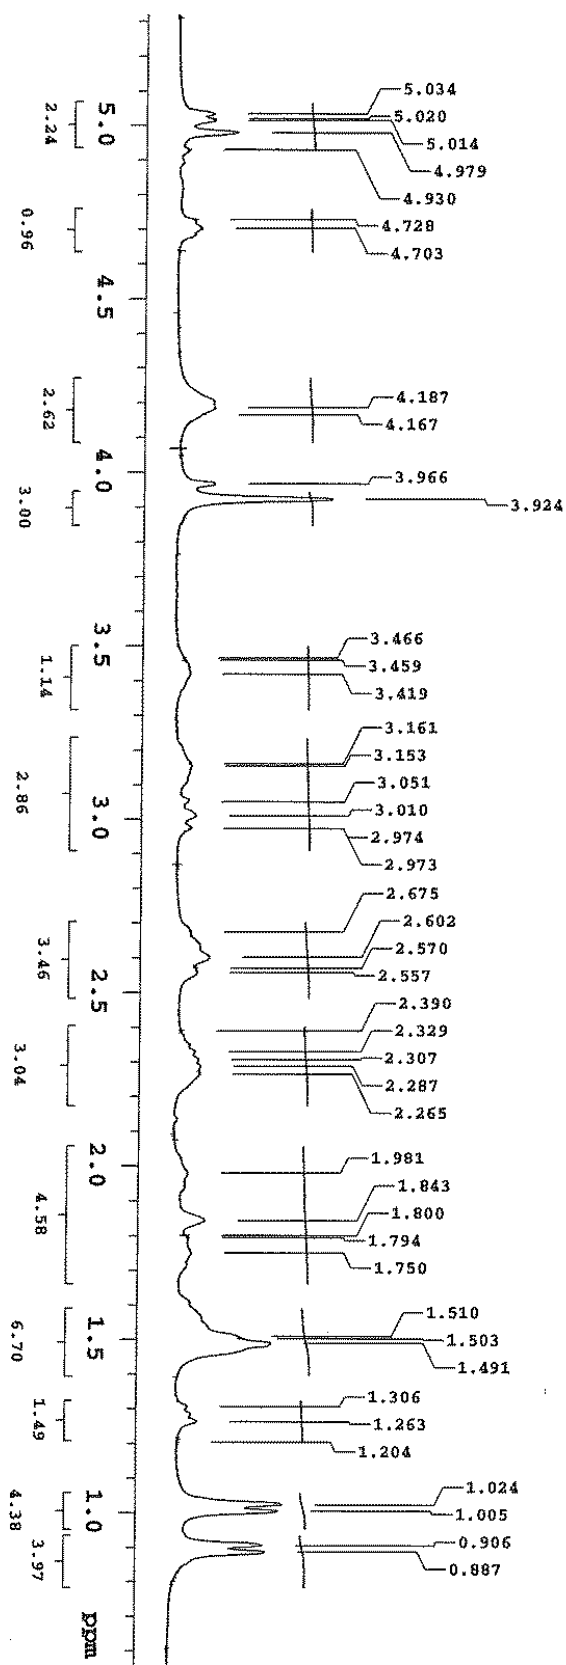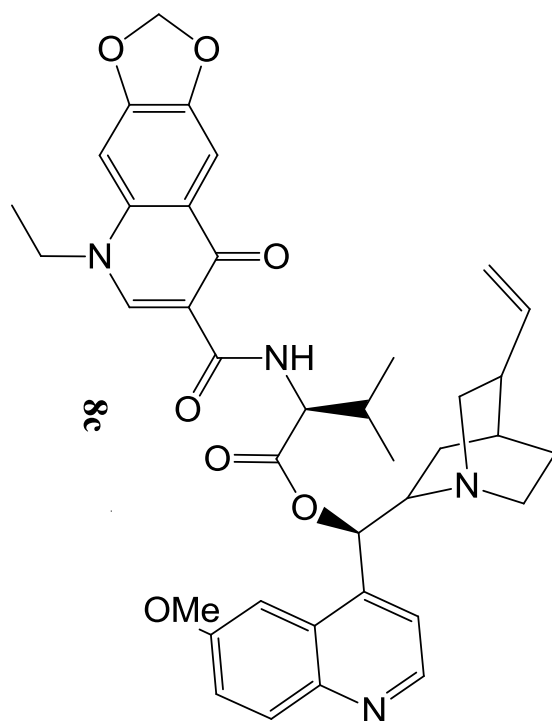

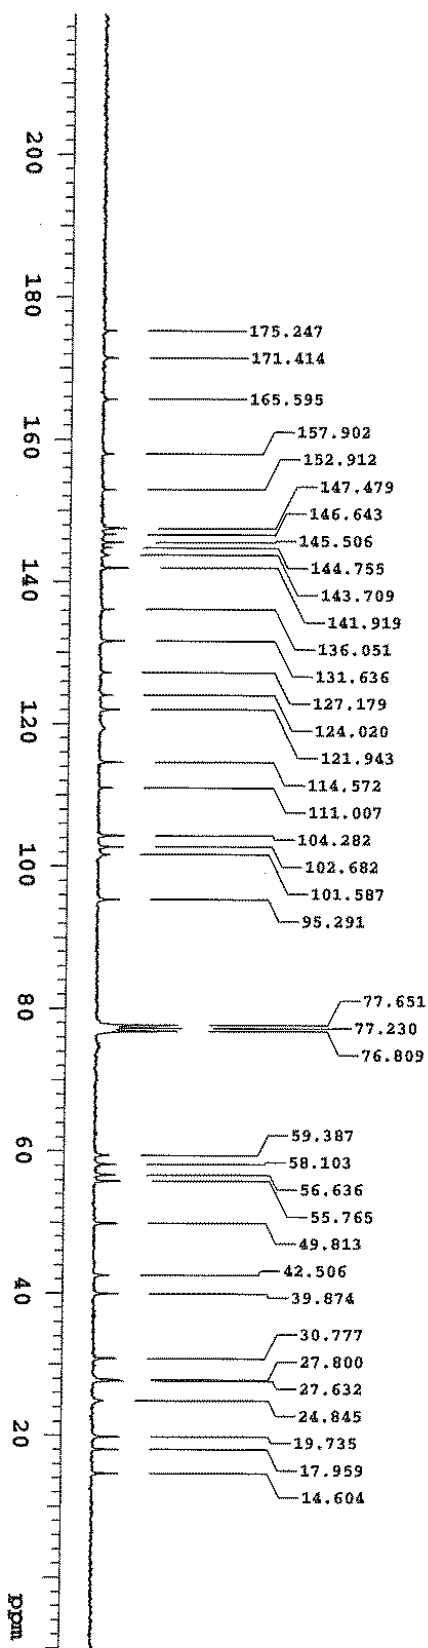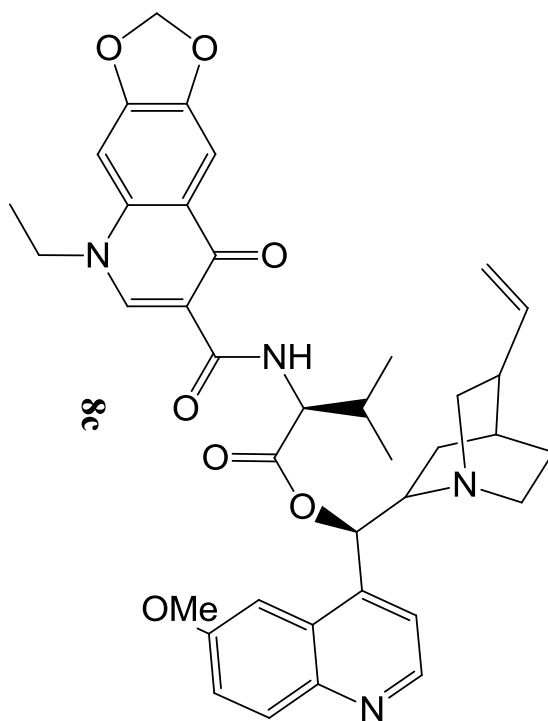

EAGER 200 Stripchart

Sample Ident. : 01 OXO-Val Qui (B) Filename : 265331  
 Analysed : 12-02-11 10:04:39 Printed : 12-02-2011 11:45:28

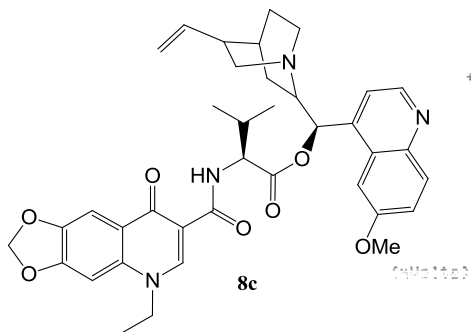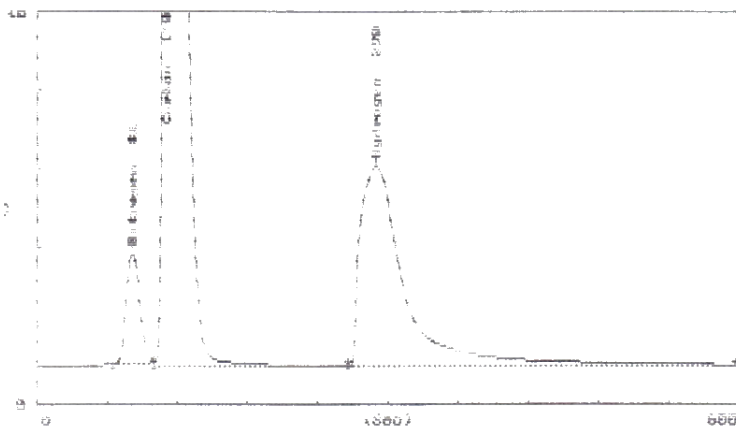

EAGER 200 Peak Integration Report

Instrument name : Instrument #1 Bline drift (fV):-2.6  
 Company Name : U of Florida Operator Ident. : KOU  
 Analysed : 12-02-11 10:04:39 Printed : 12-02-2011 11:45:28  
 Sample Ident. : 01 OXO-Val-Qui (B) Filename : 265331  
 Sample Weight : 2.104 Calc.method: using 'K. Factors'

| No. (#) | Type (#) | Start (Sec) | End (Sec) | Ret Time (Sec) | Height (fV) | Area (fV*Sec) | Area % (%) | Name     |
|---------|----------|-------------|-----------|----------------|-------------|---------------|------------|----------|
| 1       | CM       | 105         | 109       | 81             | 2826.9      | 36768         | 3.38       | Nitrogen |
| 2       | CM       | 105         | 200       | 110            | 50245.8     | 829825        | 76.26      | Carbon   |
| 3       | CM       | 200         | 307       | 290            | 5050.4      | 221446        | 20.36      | Hydrogen |
|         |          |             |           |                |             | 1087839       | 100.00     |          |

EAGER 200 Unk Report

Instrument name : Instrument #1 Bline drift (fV):-2.6  
 Company Name : U of Florida Operator Ident. : KOU  
 Analysed : 12-02-11 10:04:39 Printed : 12-02-2011 11:45:28  
 Sample Ident. : 01 OXO-Val-Qui (B) Filename : 265331  
 Sample Weight : 2.104 Calc.method: using 'K. Factors'

| PK. (#) | Ret Time (Sec) | Area (fV*Sec) | Element % (%) | Area Ratio  | Name     |
|---------|----------------|---------------|---------------|-------------|----------|
| 1       | 81             | 36768         | 3.38          | .226039E+02 | Nitrogen |
| 2       | 110            | 829825        | 80.050        | .100000E+01 | Carbon   |
| 3       | 290            | 221446        | 21.570        | .071641E+01 | Hydrogen |

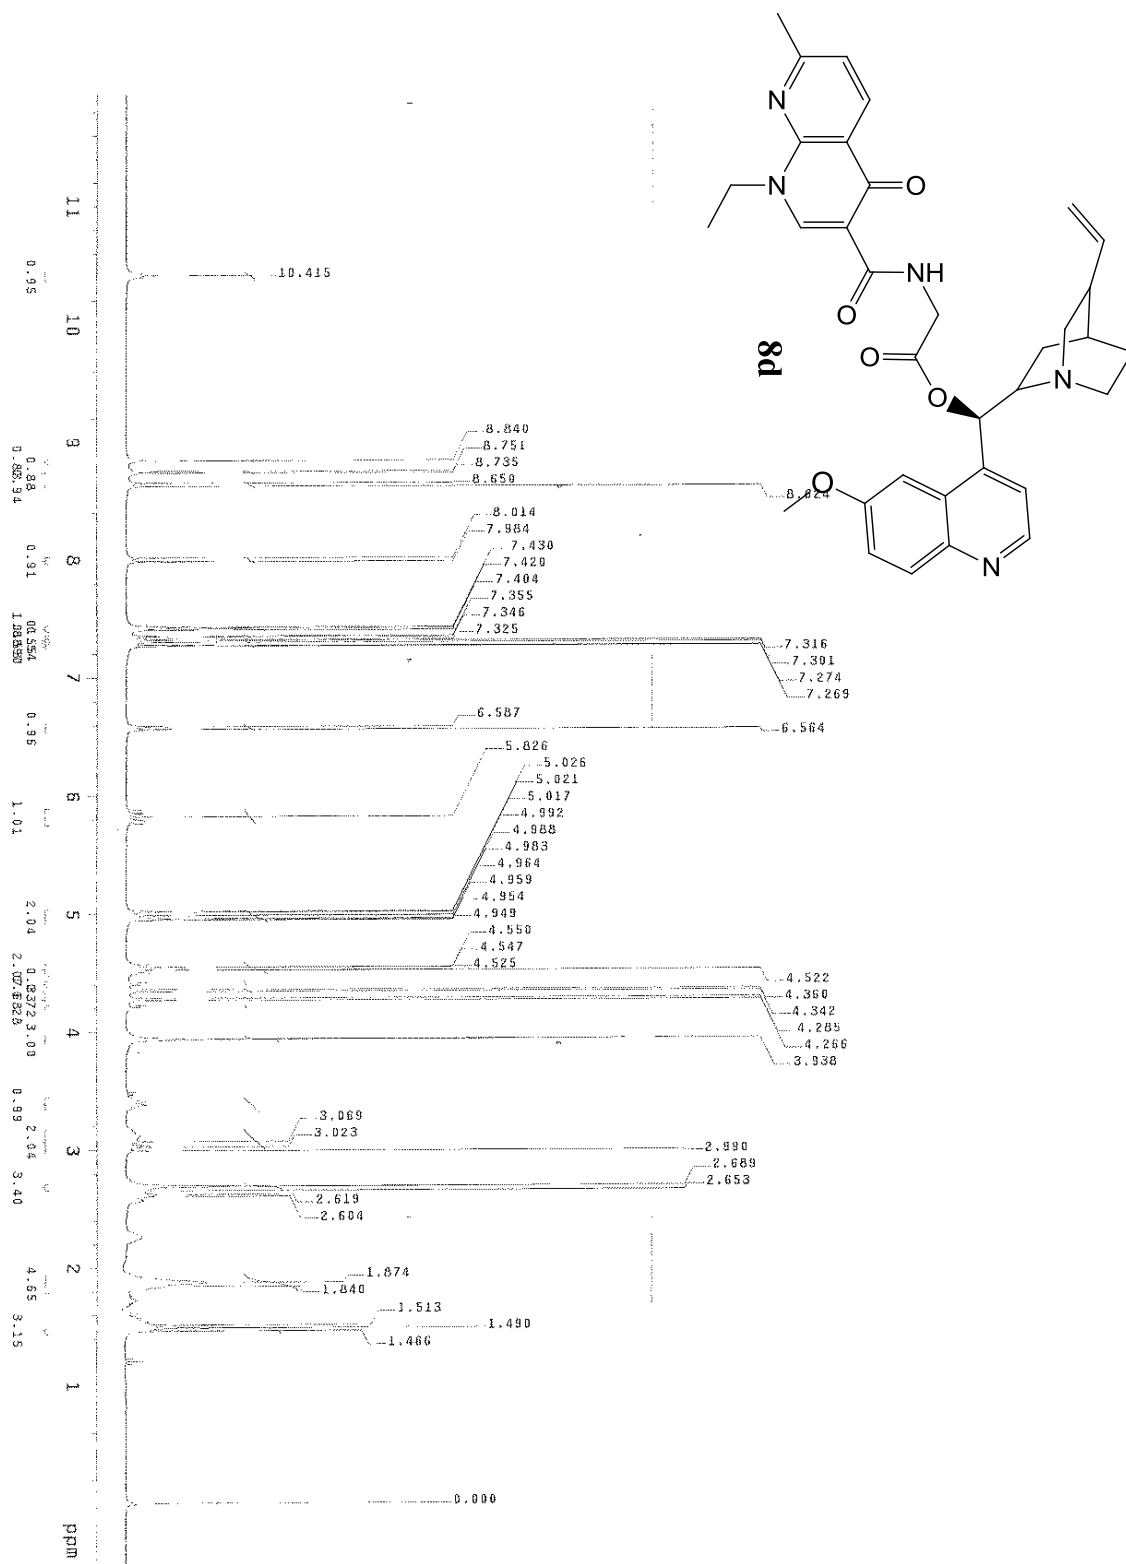

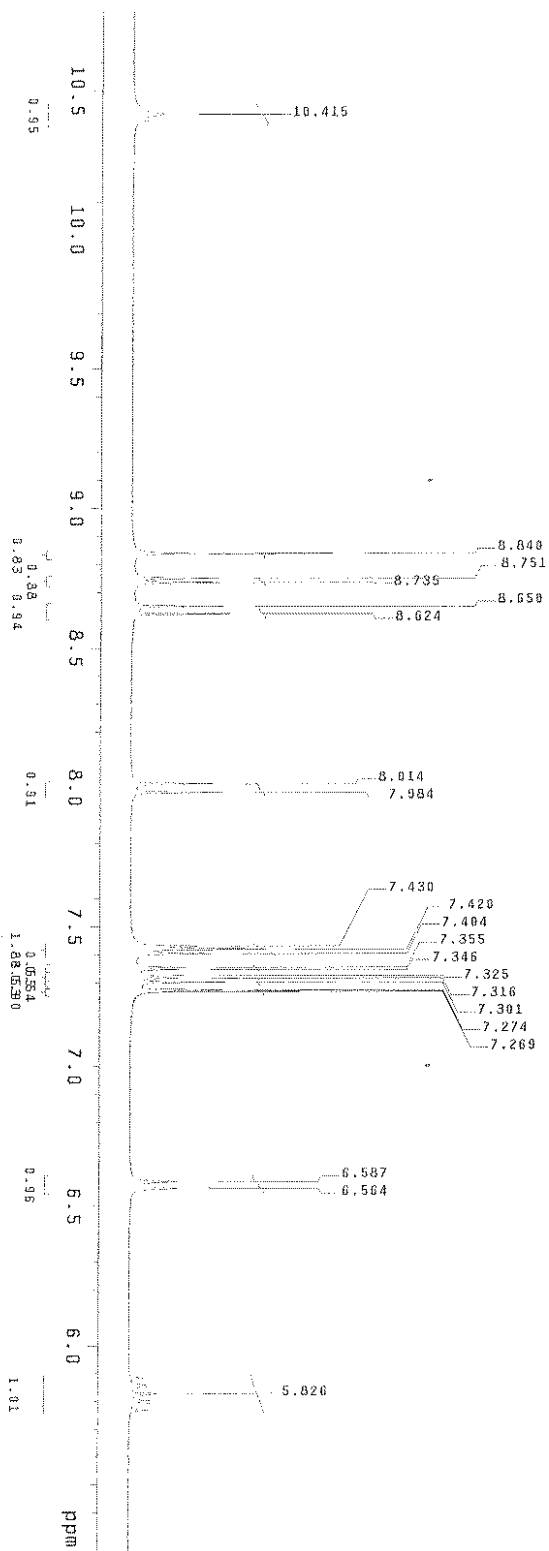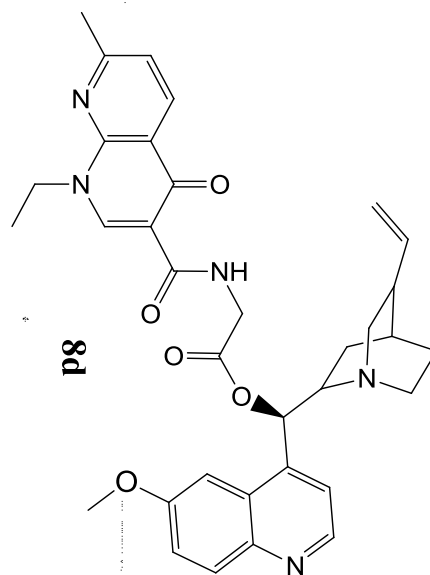

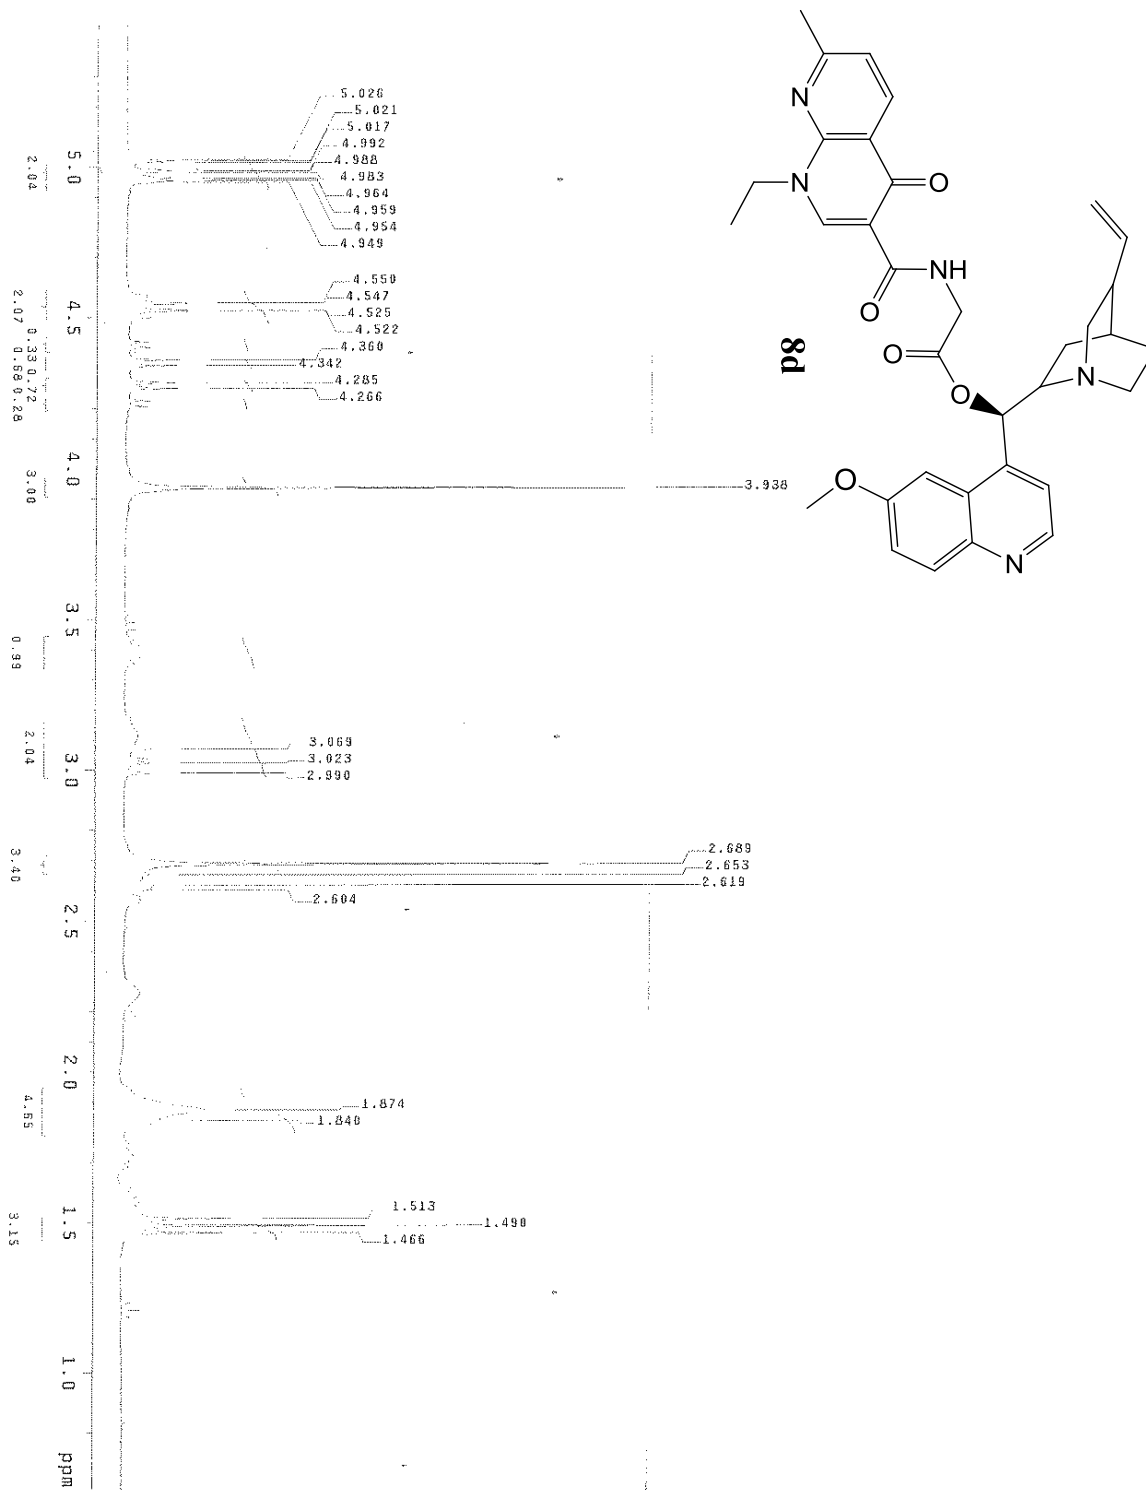

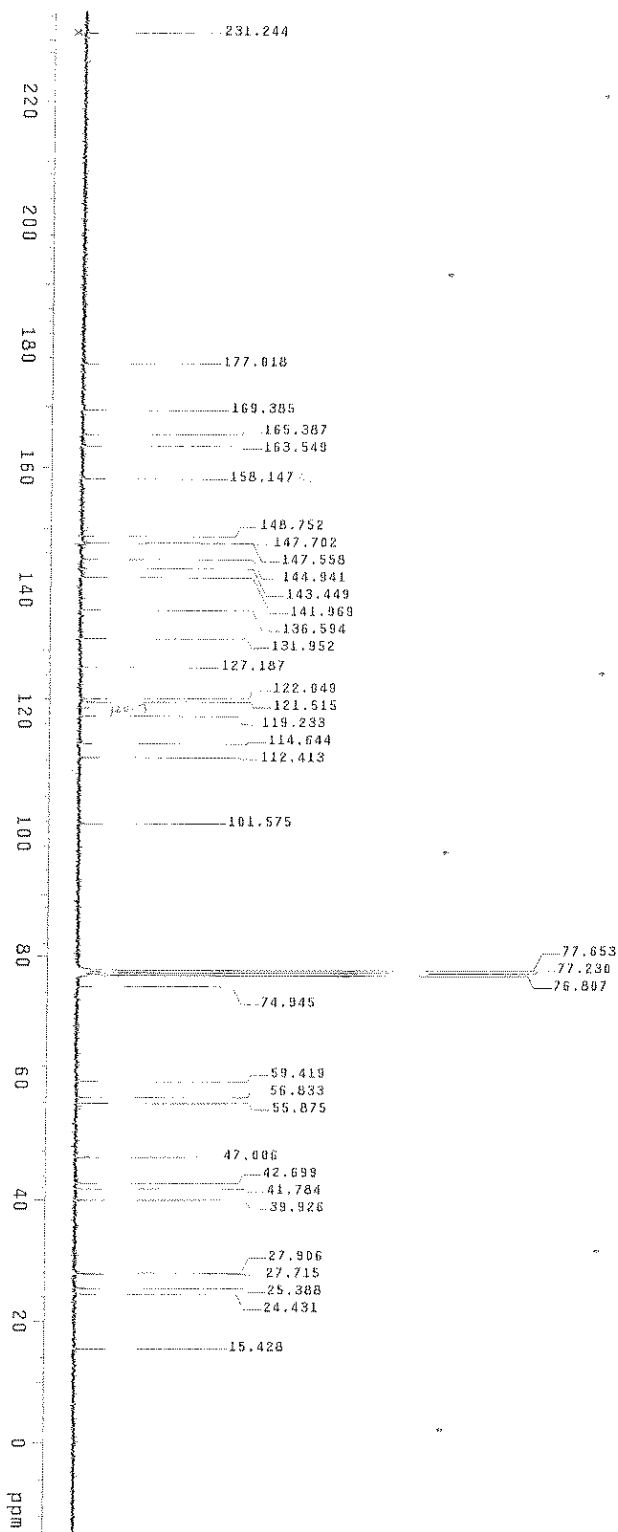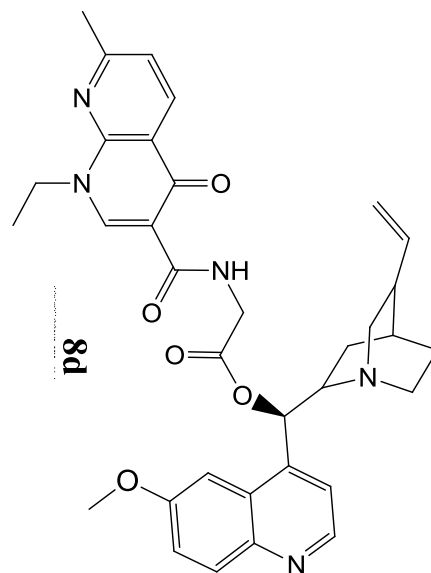



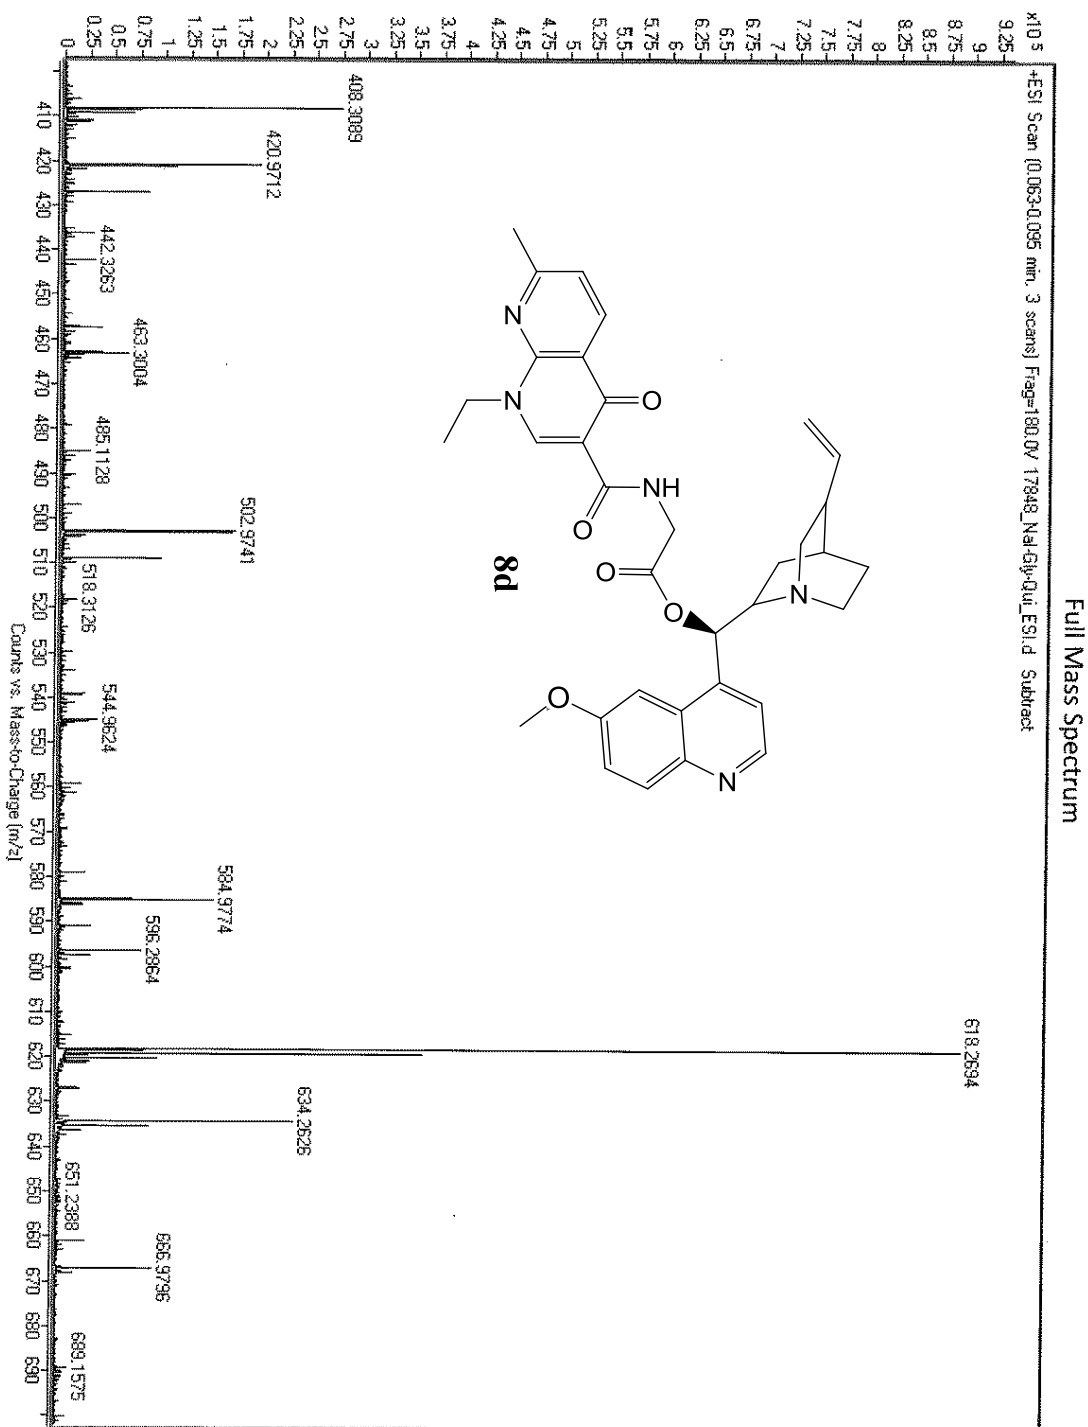

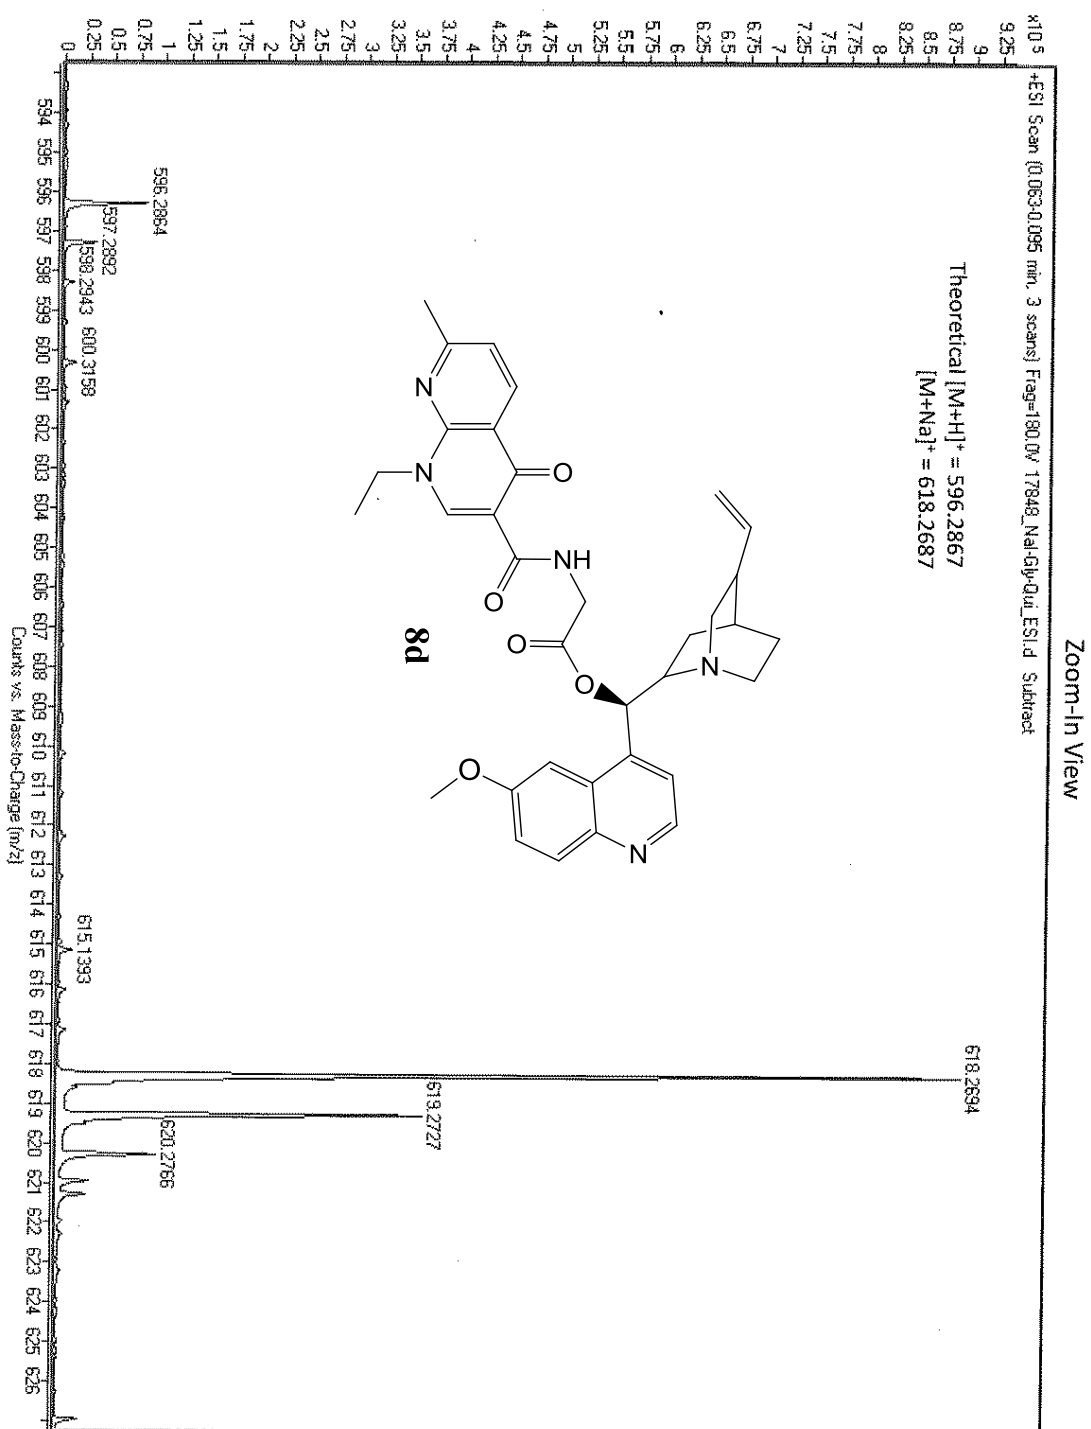

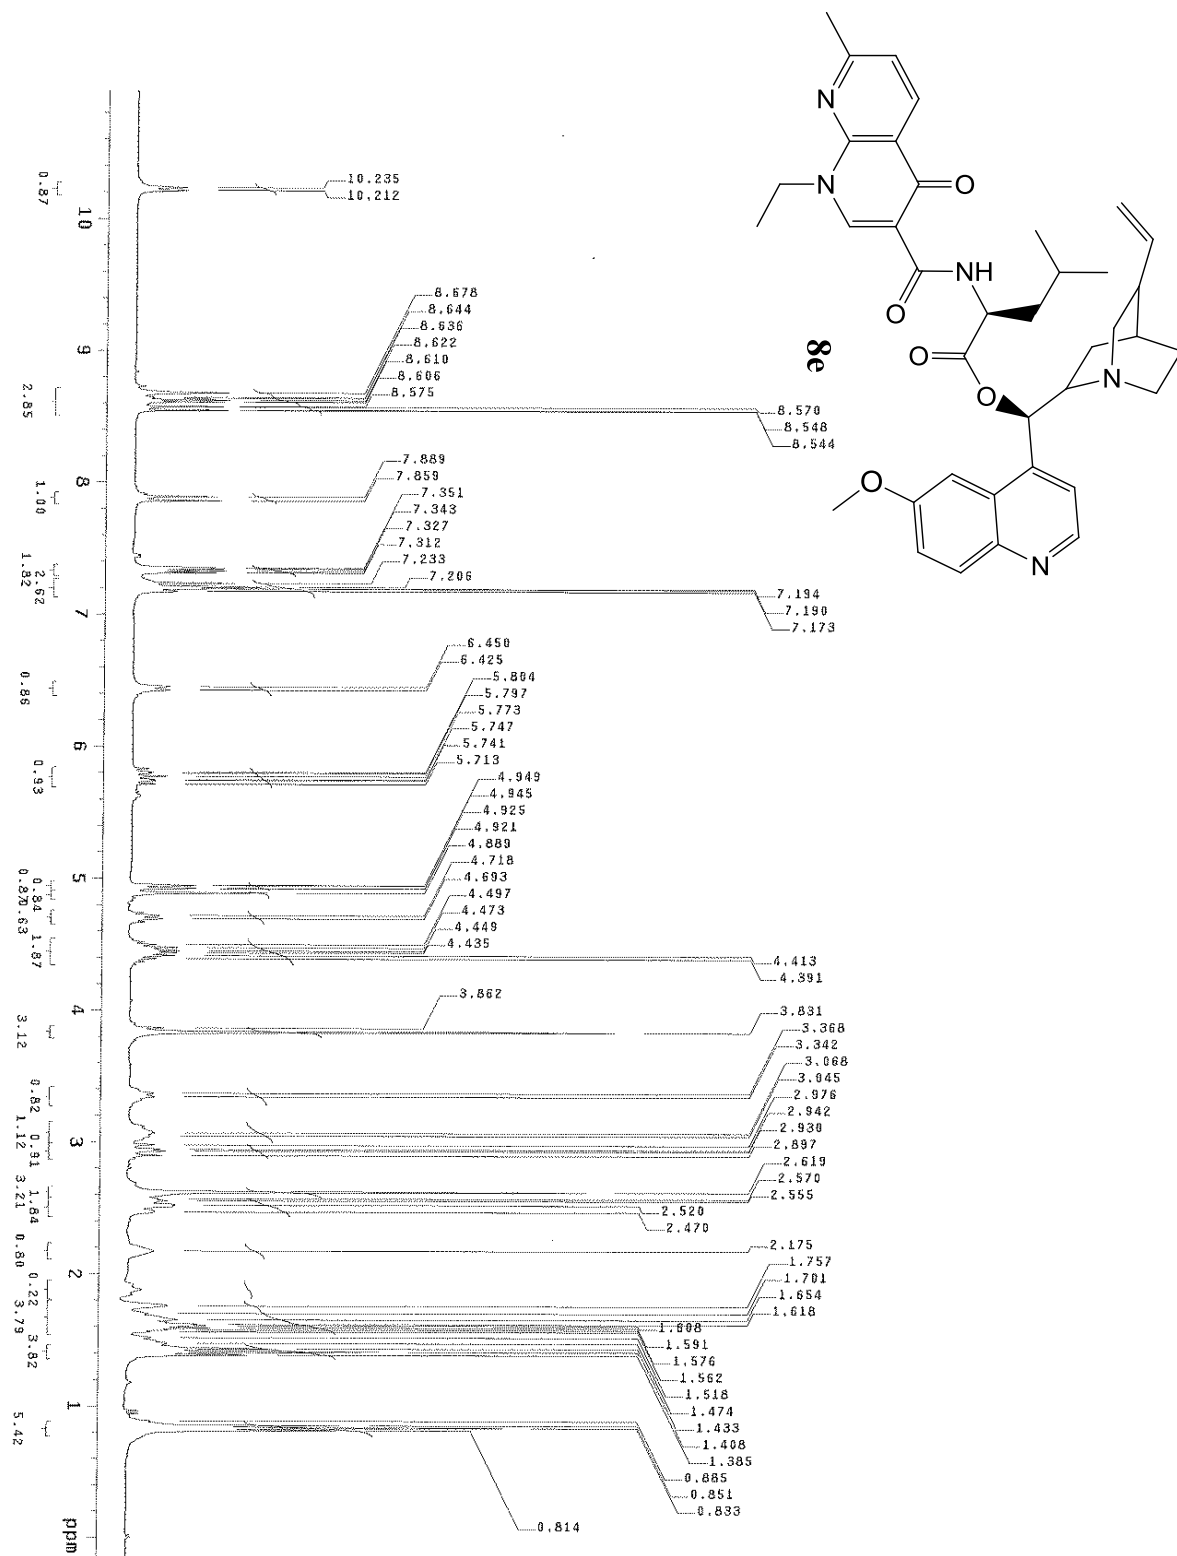

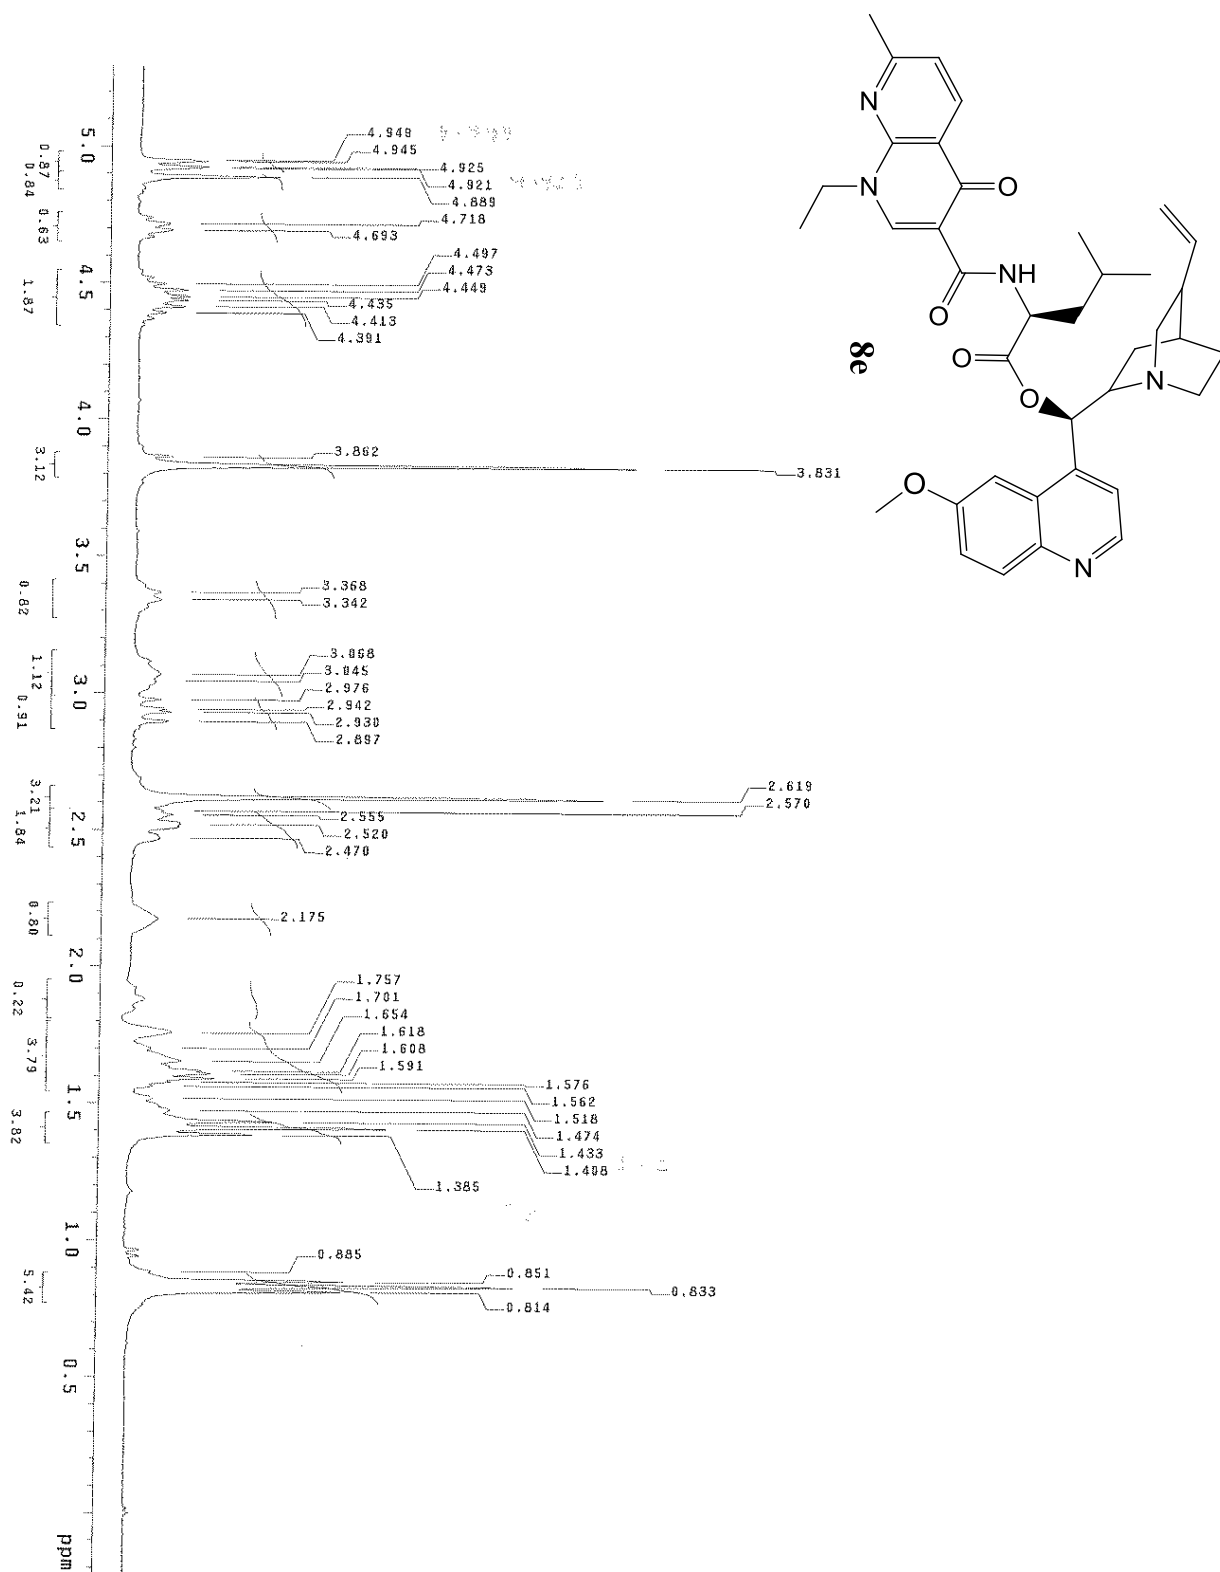

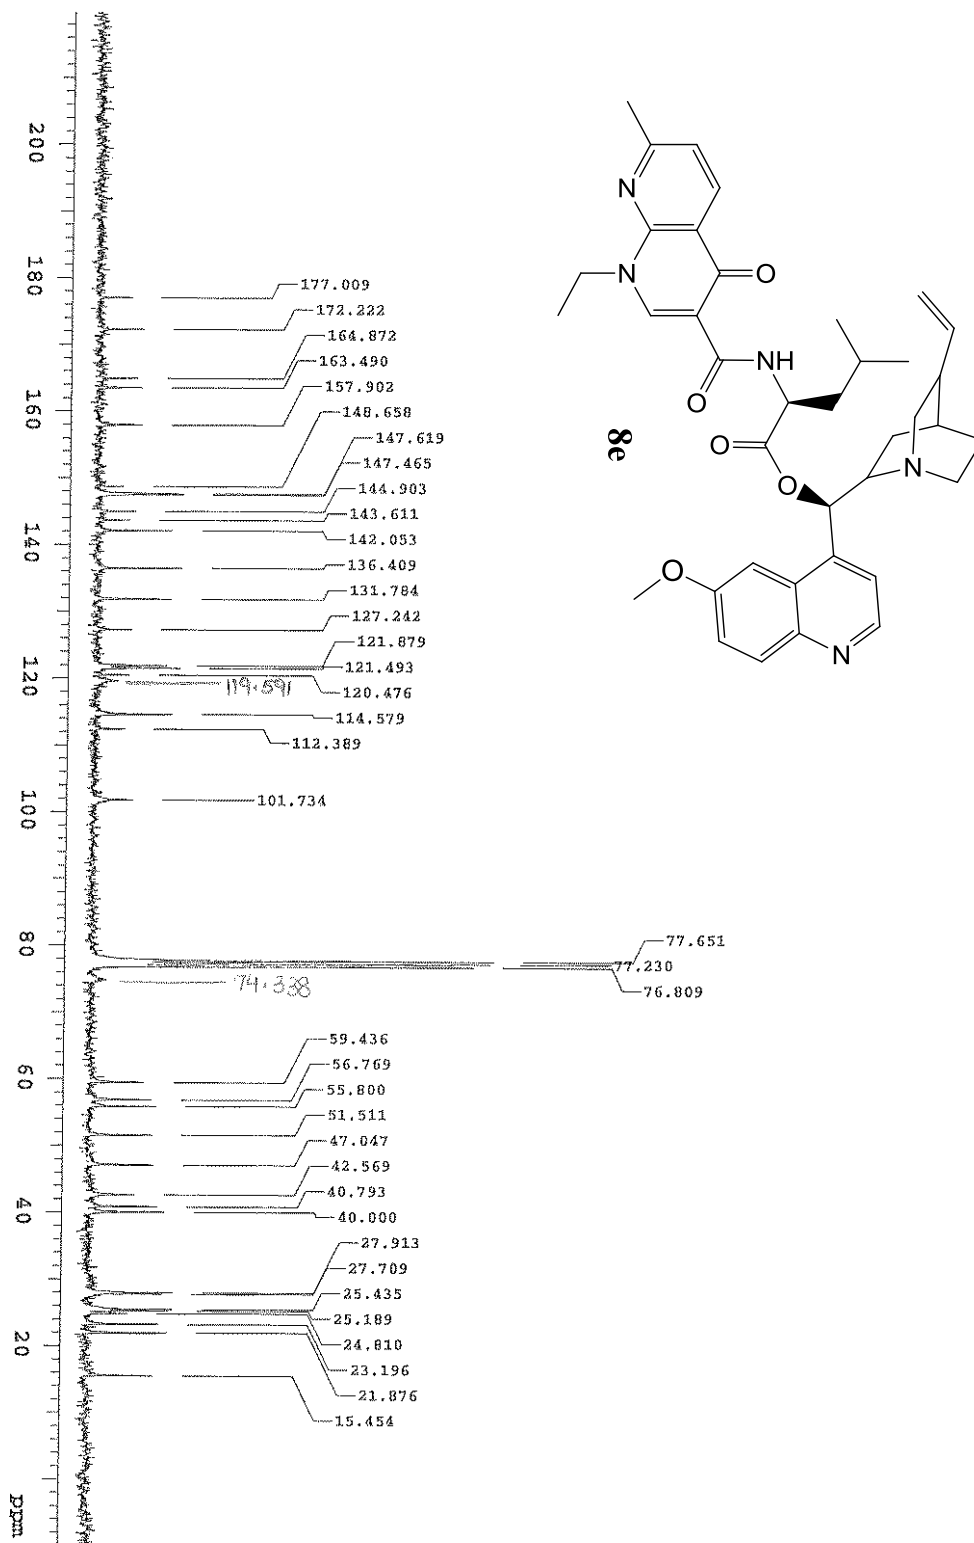

EAGER 200 Stripchart

Sample Ident. : 24 NallQ      Filename : 261124  
 Analysed : 08-05-11 08:35:19      Printed : 08-05-2011 11:26:45

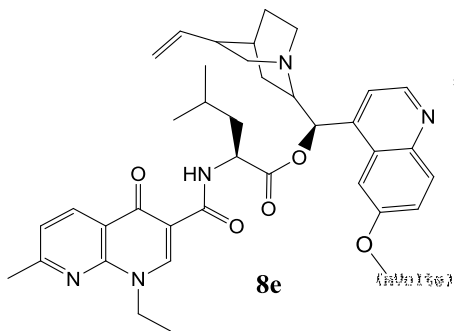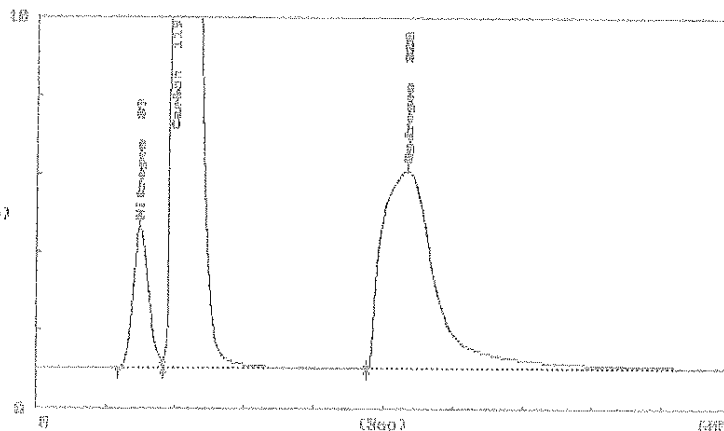

EAGER 200 Peak Integration Report

Instrument name : Instrument #1      Bline drift (fV): 7.4  
 Company Name : U of Florida      Operator Ident. : KOU  
 Analysed : 08-05-11 08:35:19      Printed : 08-05-2011 11:26:45  
 Sample Ident. : 24 NallQ      Filename : 261124  
 Sample Weight : 2.141      Calc.method: using 'K. Factors'

| No. (#) | Type (#) | Start (Sec) | End (Sec) | Ret Time (Sec) | Height (fV) | Area (fV*Sec) | Area % (%) | Name     |
|---------|----------|-------------|-----------|----------------|-------------|---------------|------------|----------|
| 1       | FU       | 70          | 109       | 89             | 3549.7      | 52508         | 4.10       | Nitrogen |
| 2       | FU       | 109         | 285       | 119            | 57494.4     | 954752        | 74.48      | Carbon   |
| 3       | RS       | 285         | 598       | 320            | 5027.2      | 274600        | 21.42      | Hydrogen |
|         |          |             |           |                |             | 1281860       | 100.00     |          |

EAGER 200 Unk Report

Instrument name : Instrument #1      Bline drift (fV): 7.4  
 Company Name : U of Florida      Operator Ident. : KOU  
 Analysed : 08-05-11 08:35:19      Printed : 08-05-2011 11:26:45  
 Sample Ident. : 24 NallQ      Filename : 261124  
 Sample Weight : 2.141      Calc.method: using 'K. Factors'

| Pk. (#) | Ret Time (Sec) | Area (fV*Sec) | Element % (%) | Area Ratio  | Name     |
|---------|----------------|---------------|---------------|-------------|----------|
| 1       | 89             | 52508         | 10.543        | .181829E+02 | Nitrogen |
| 2       | 119            | 954752        | 69.724        | .100000E+01 | Carbon   |
| 3       | 320            | 274600        | 7.145         | .347688E+01 | Hydrogen |

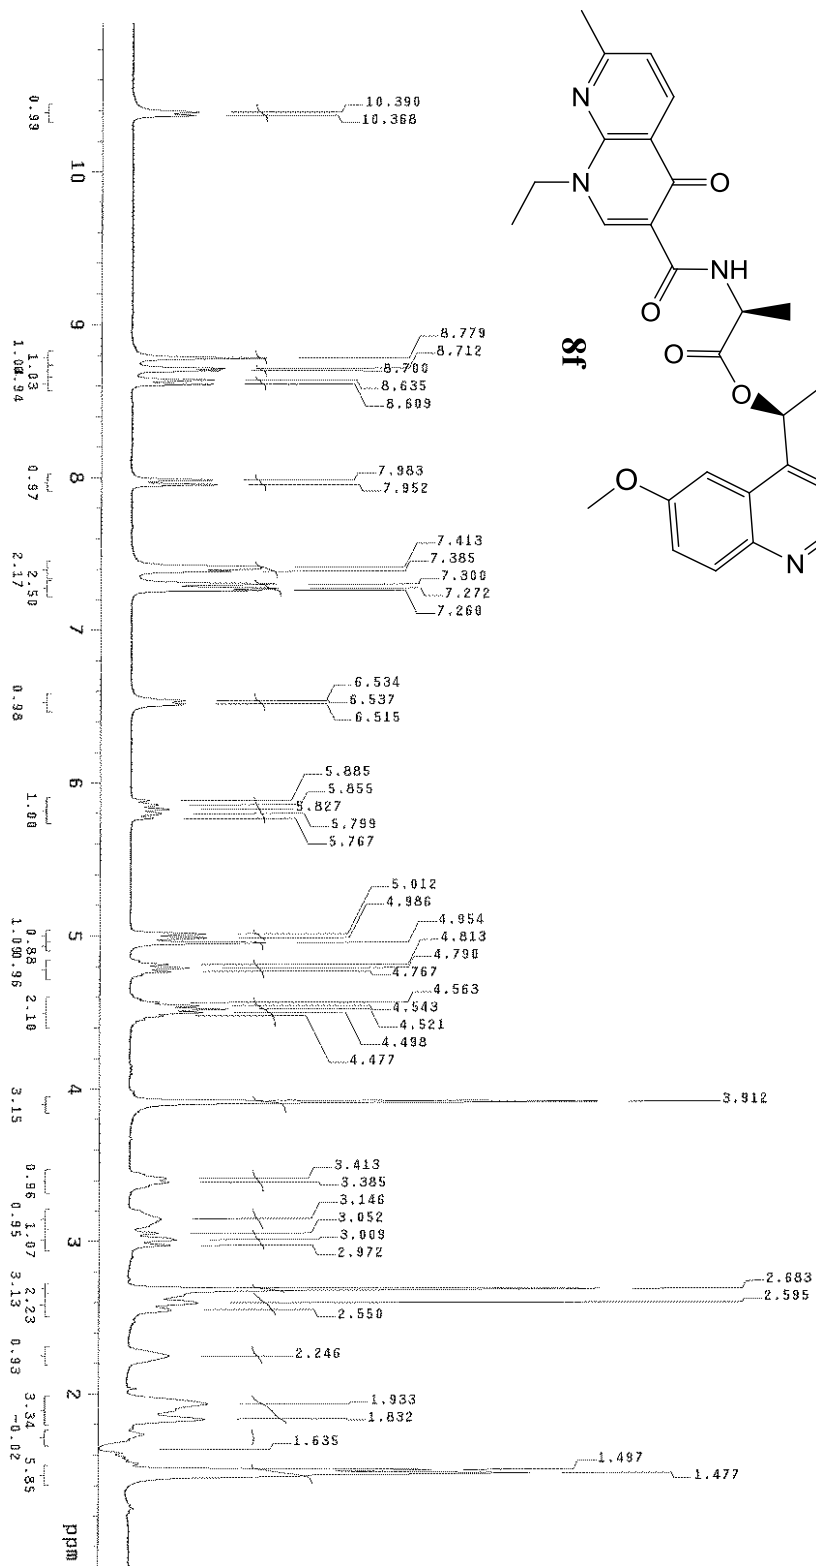

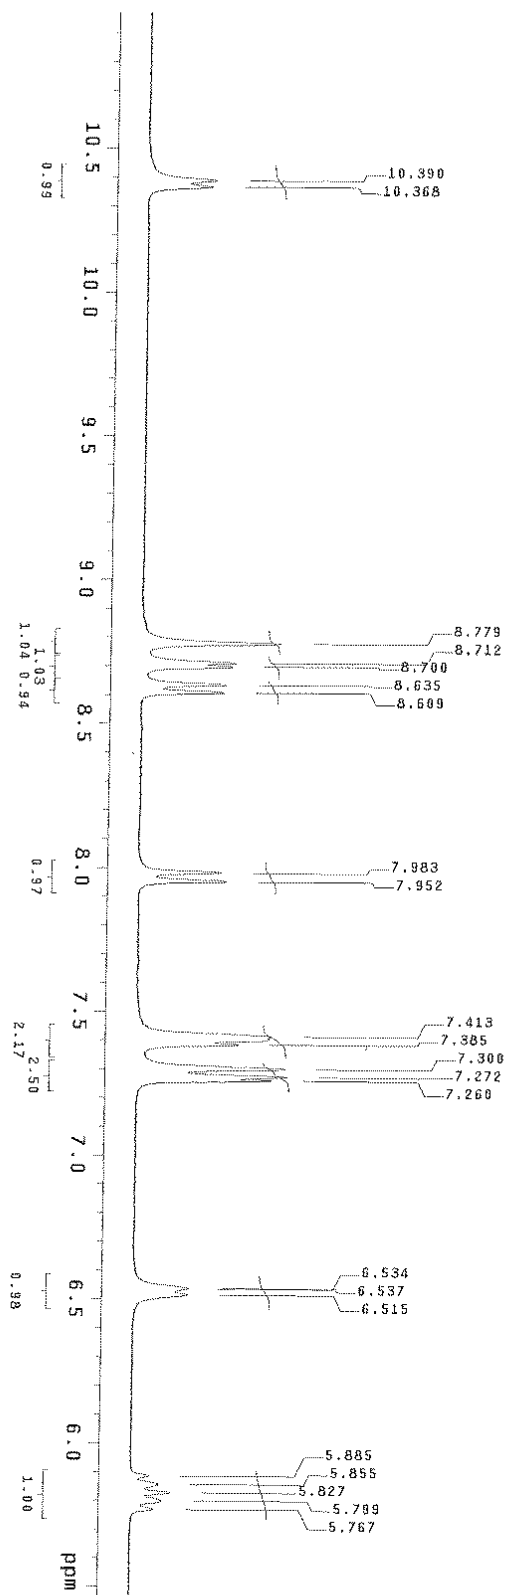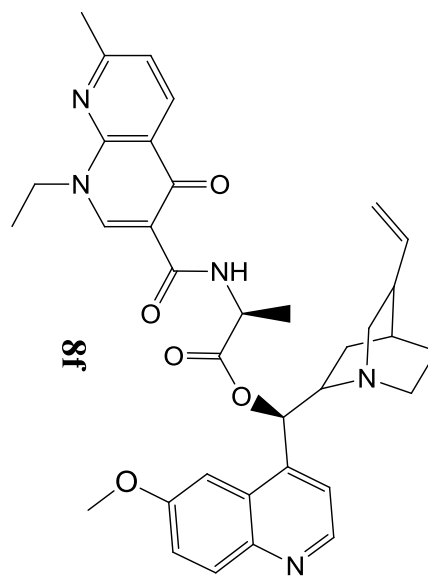



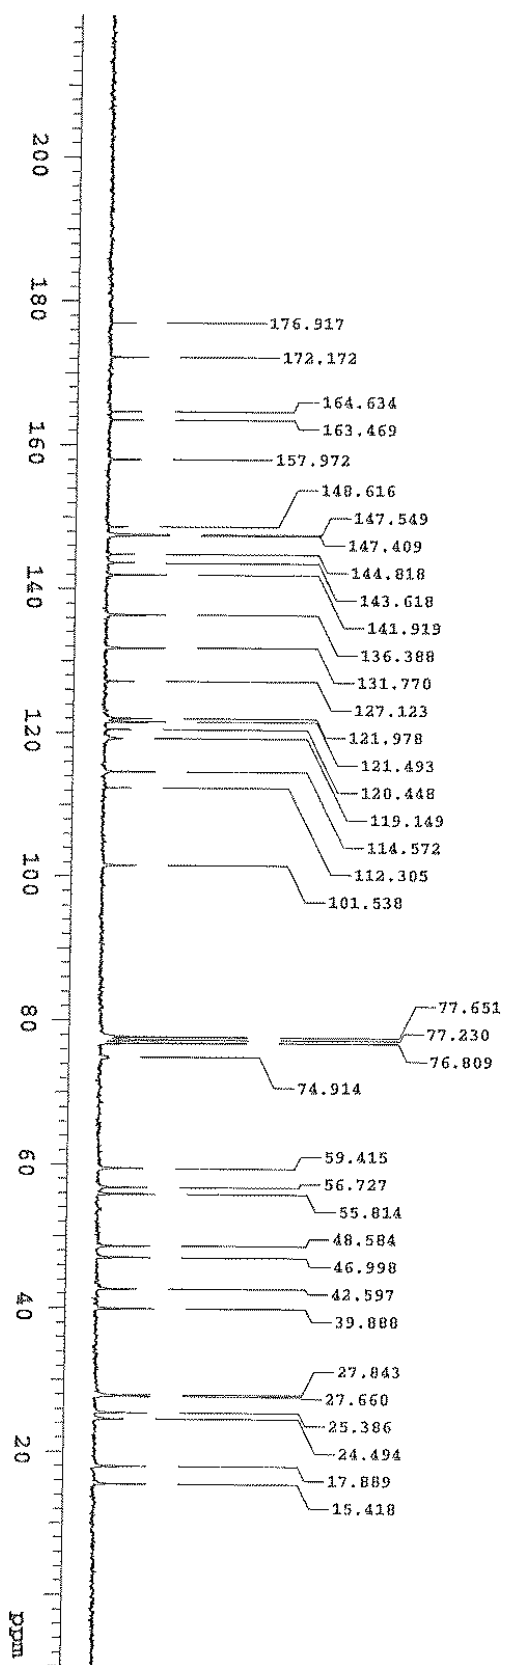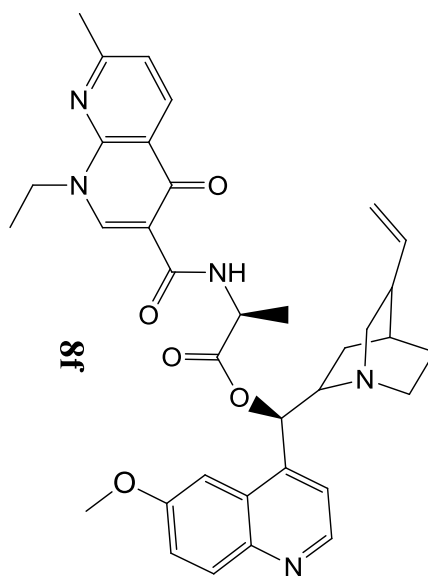

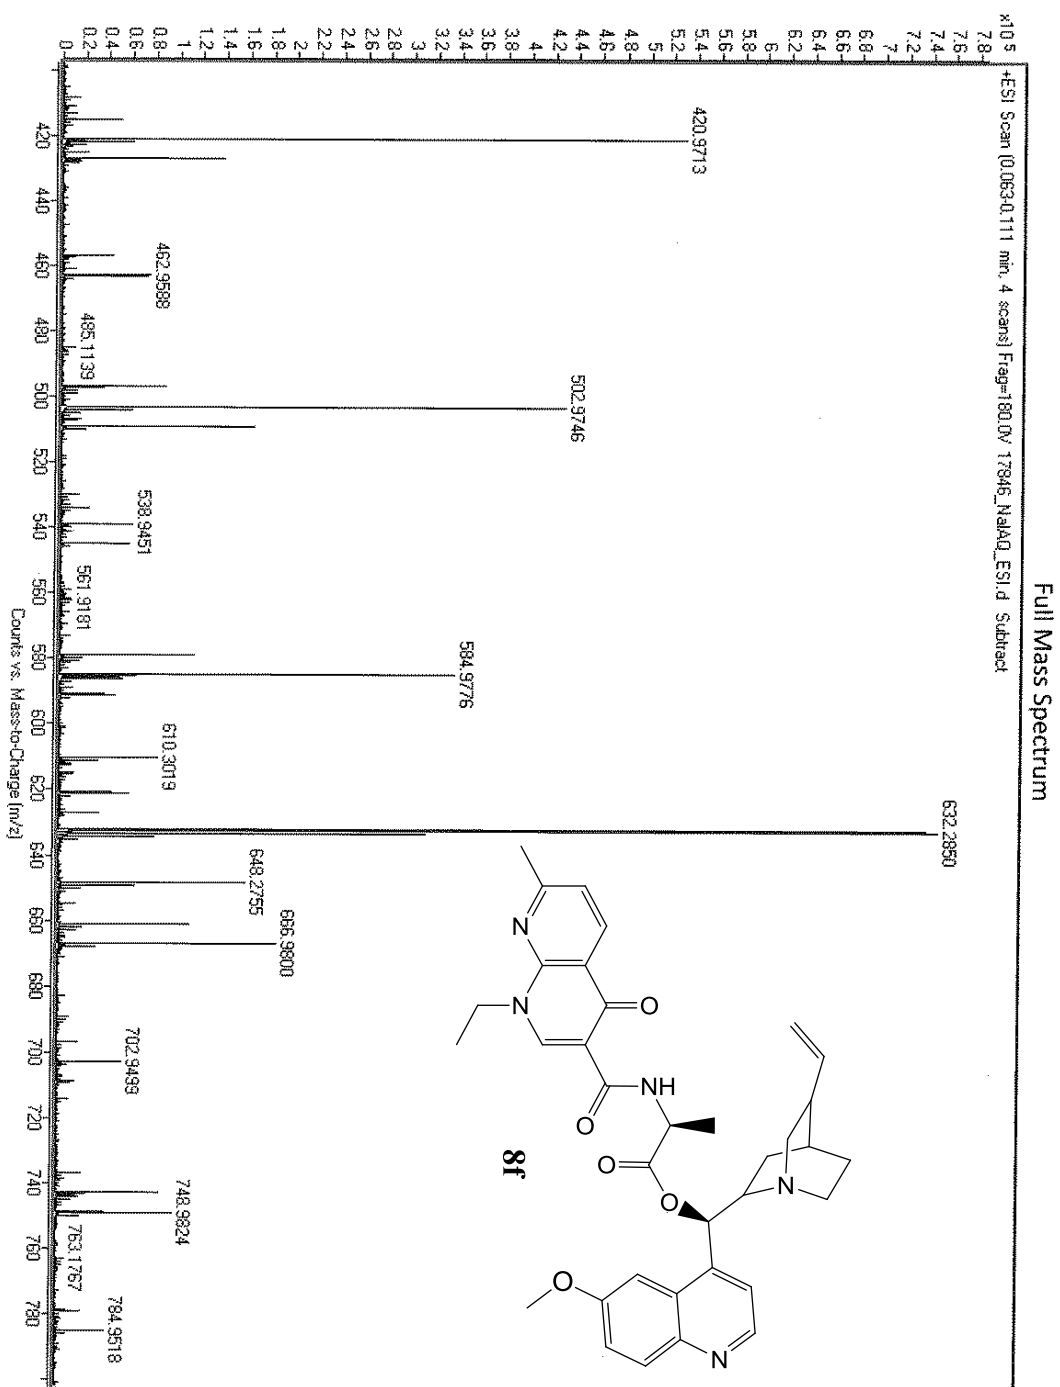

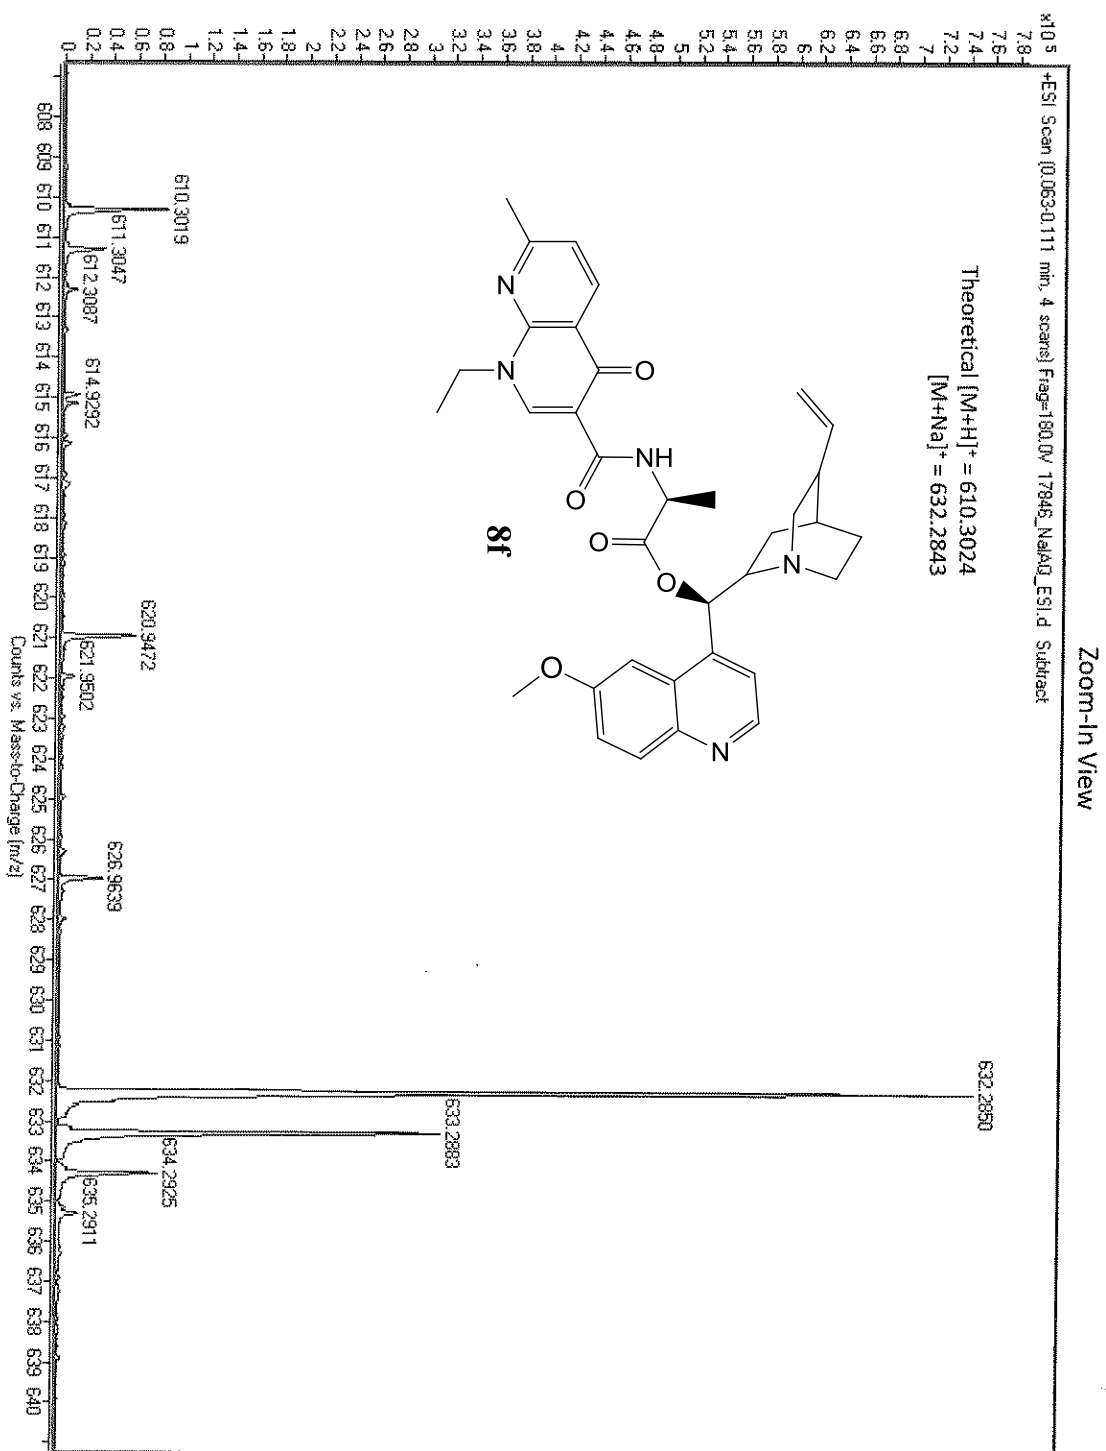

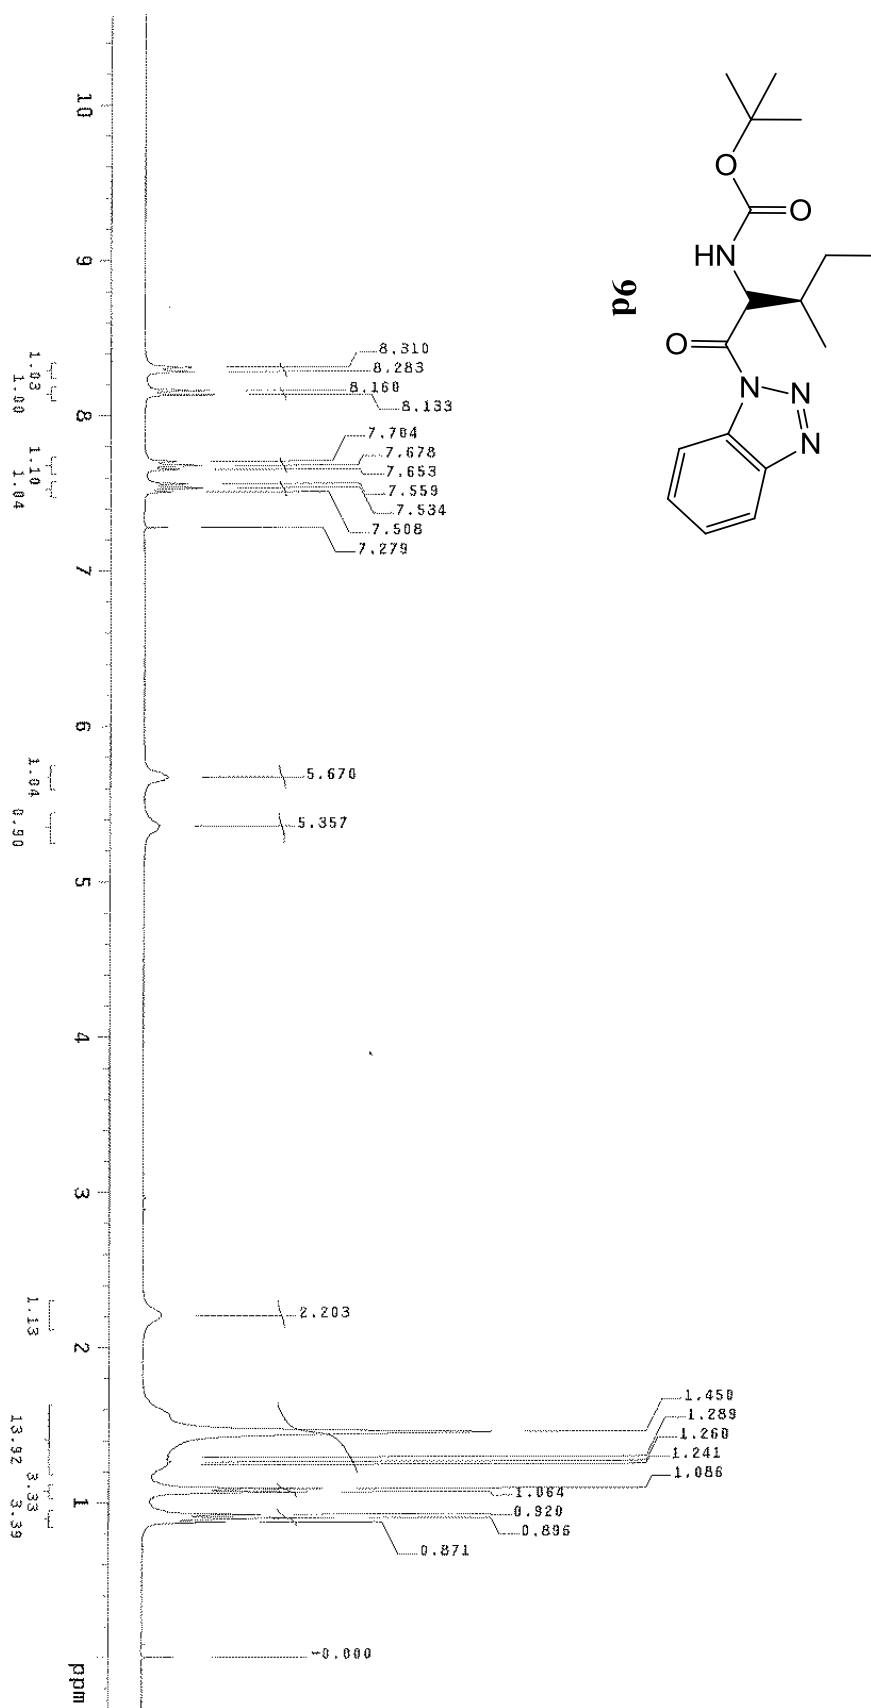

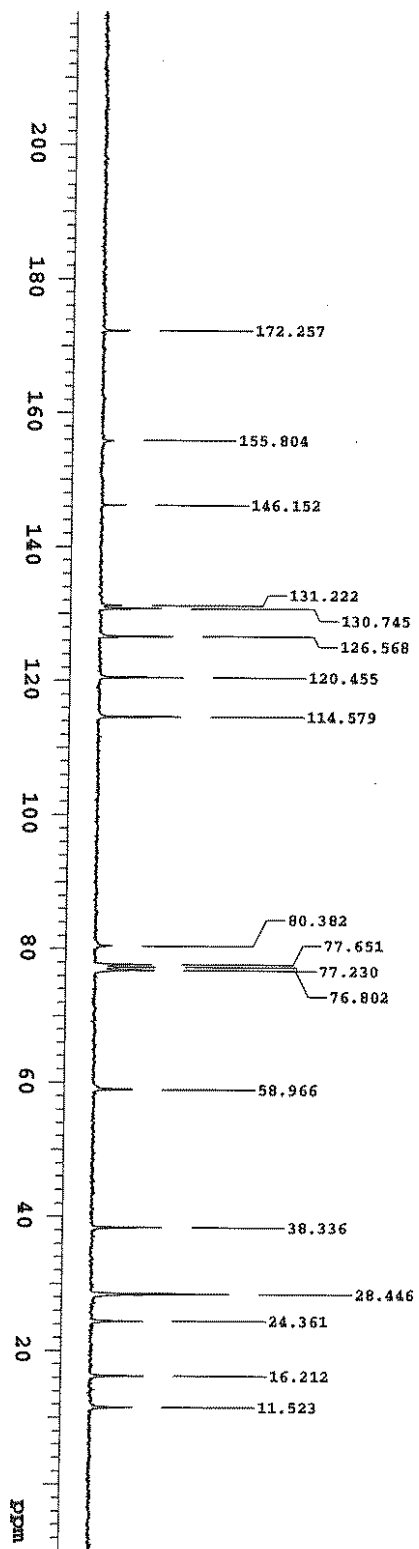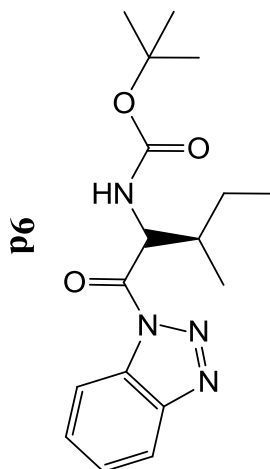

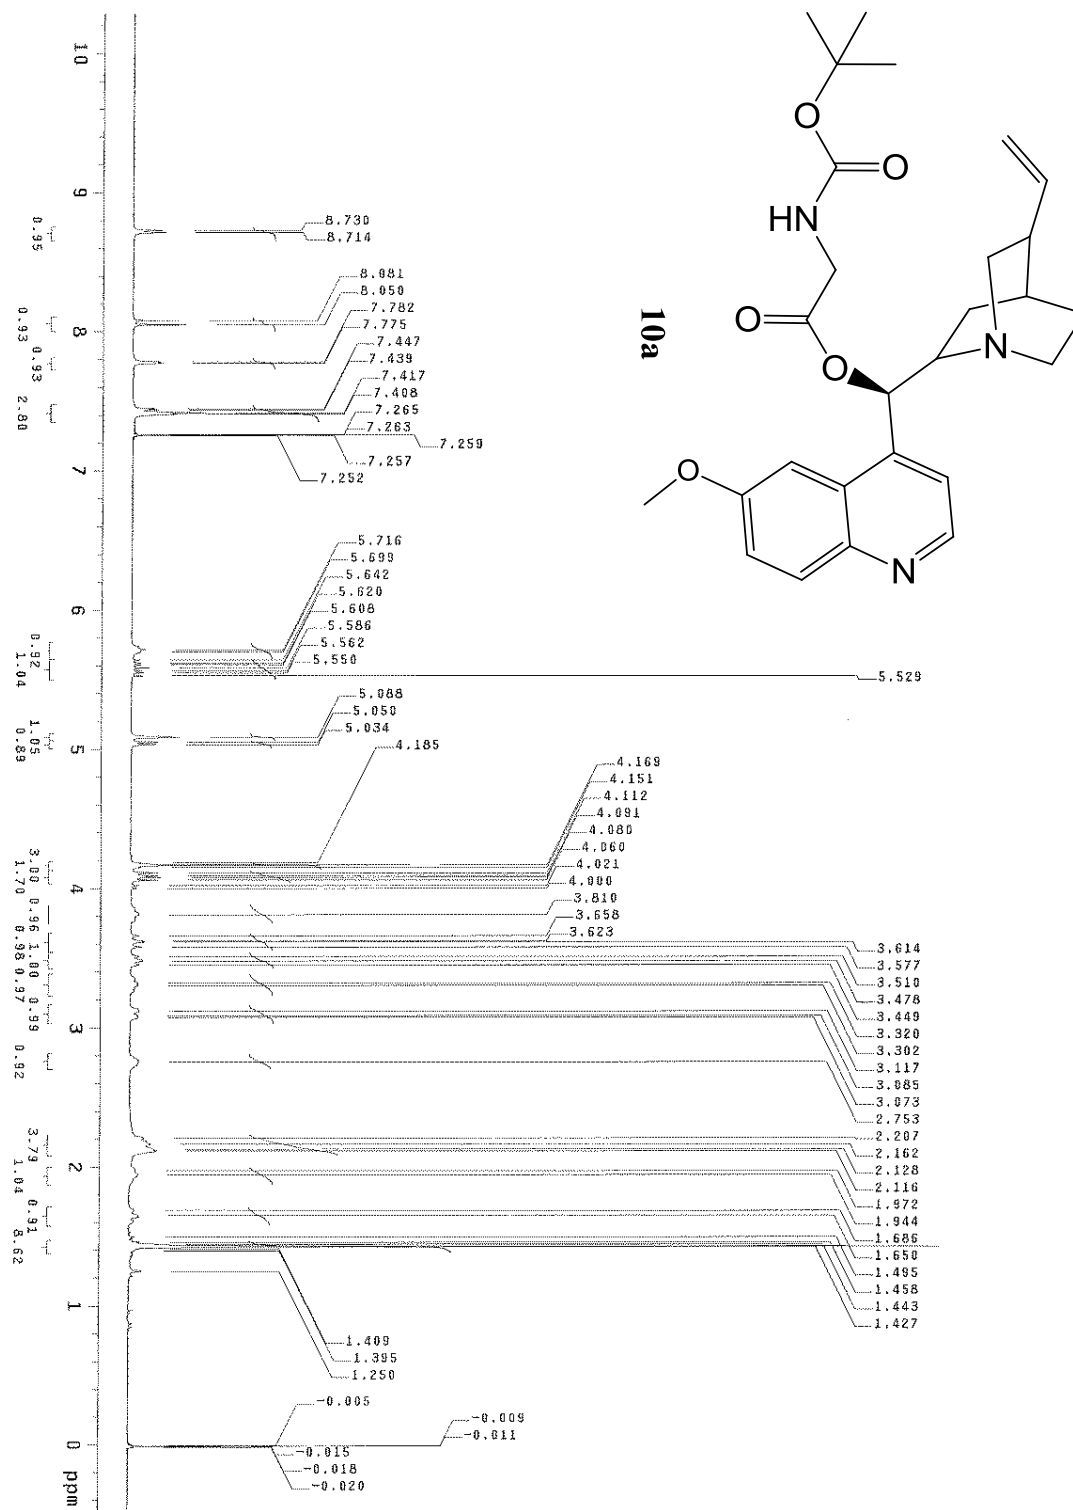

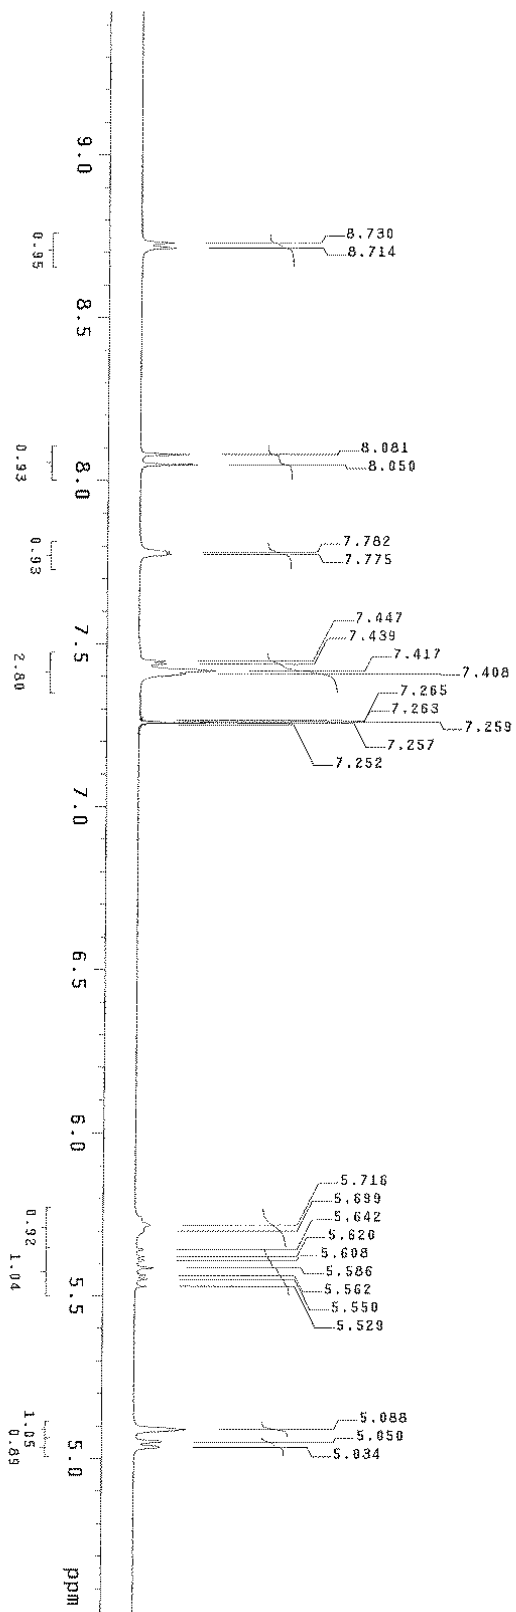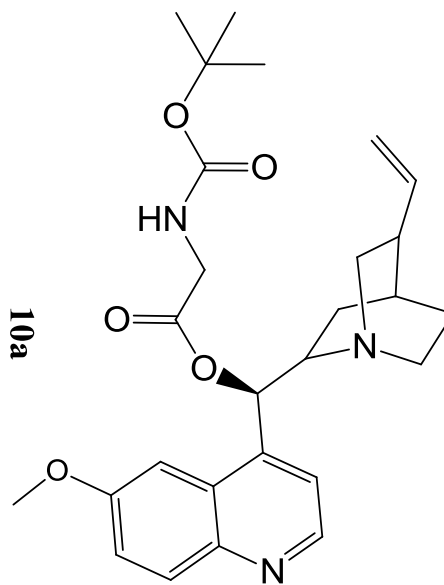

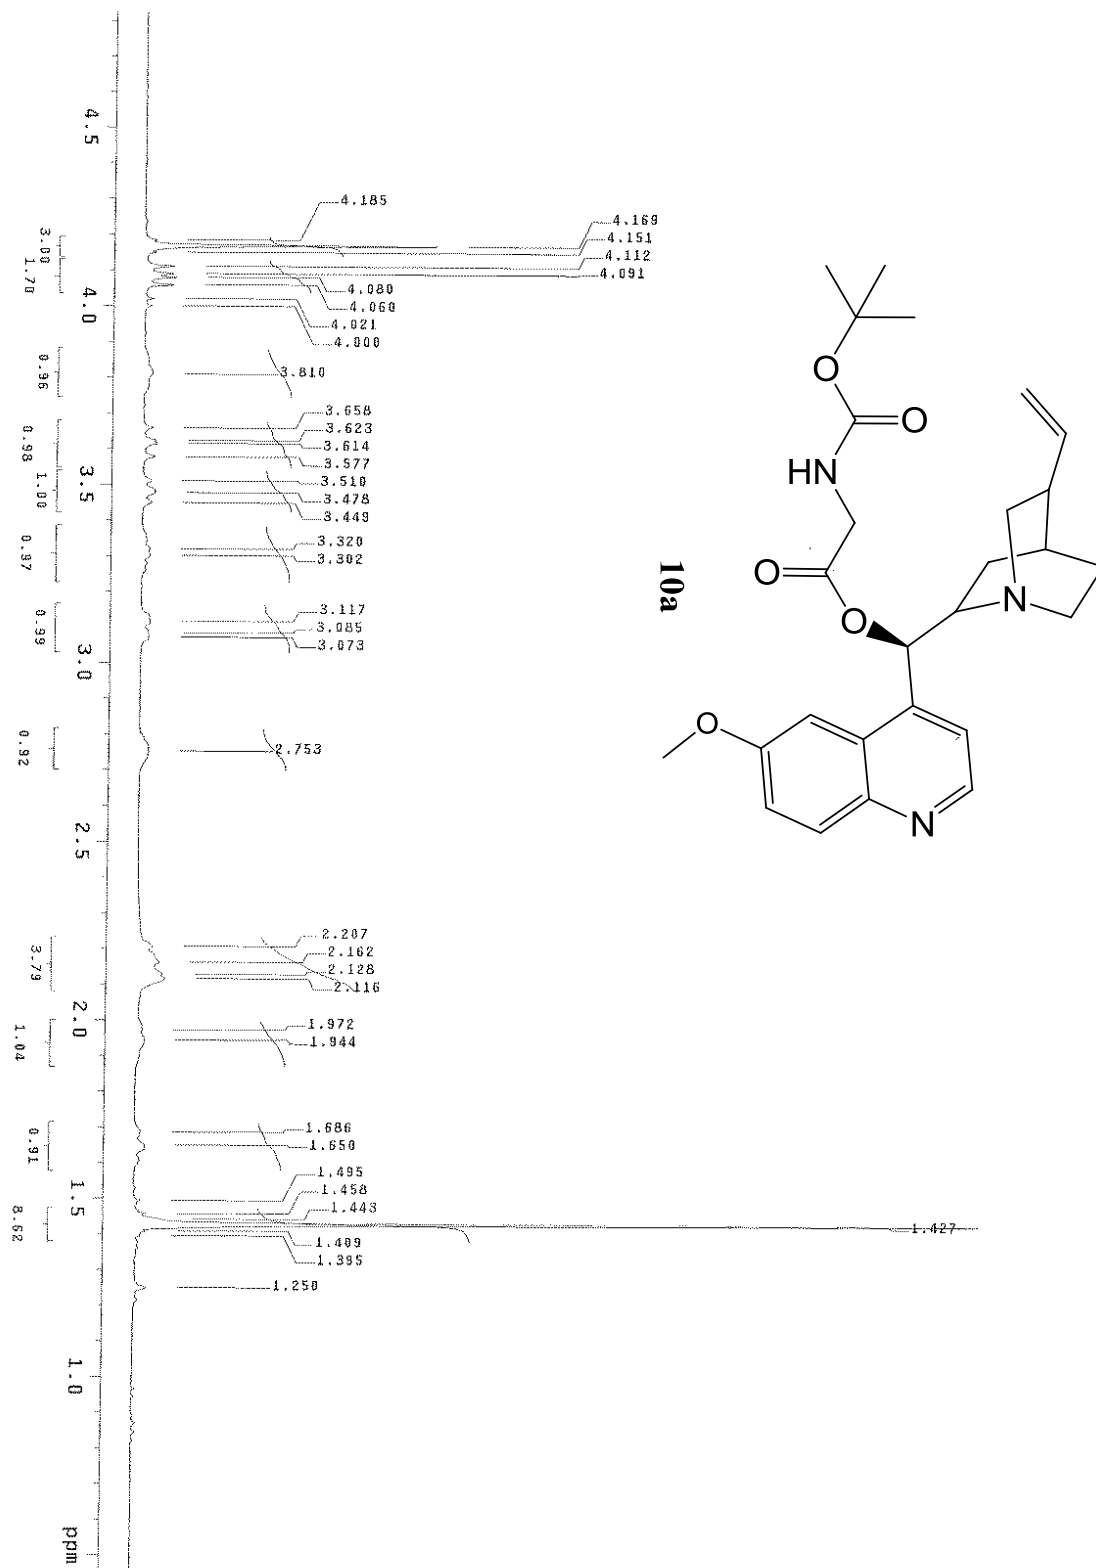



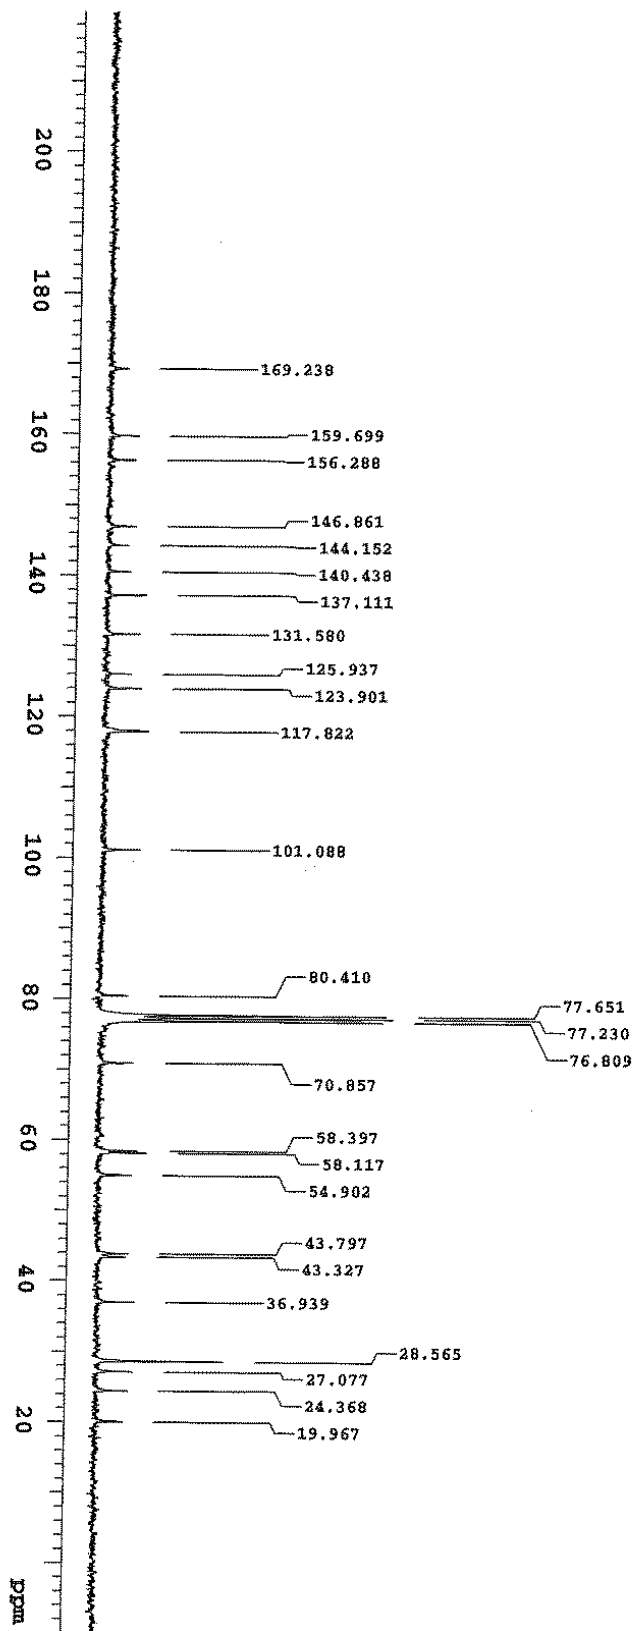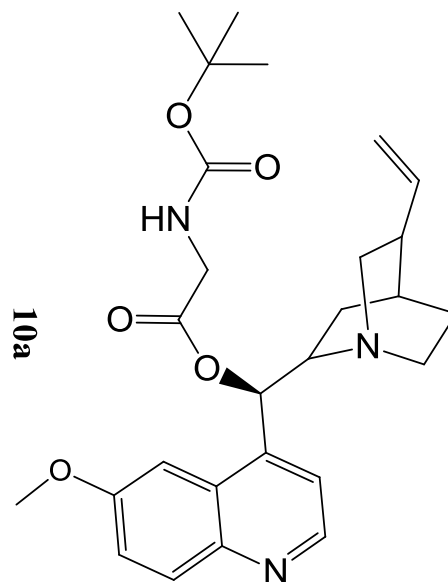

# Full mass spectrum

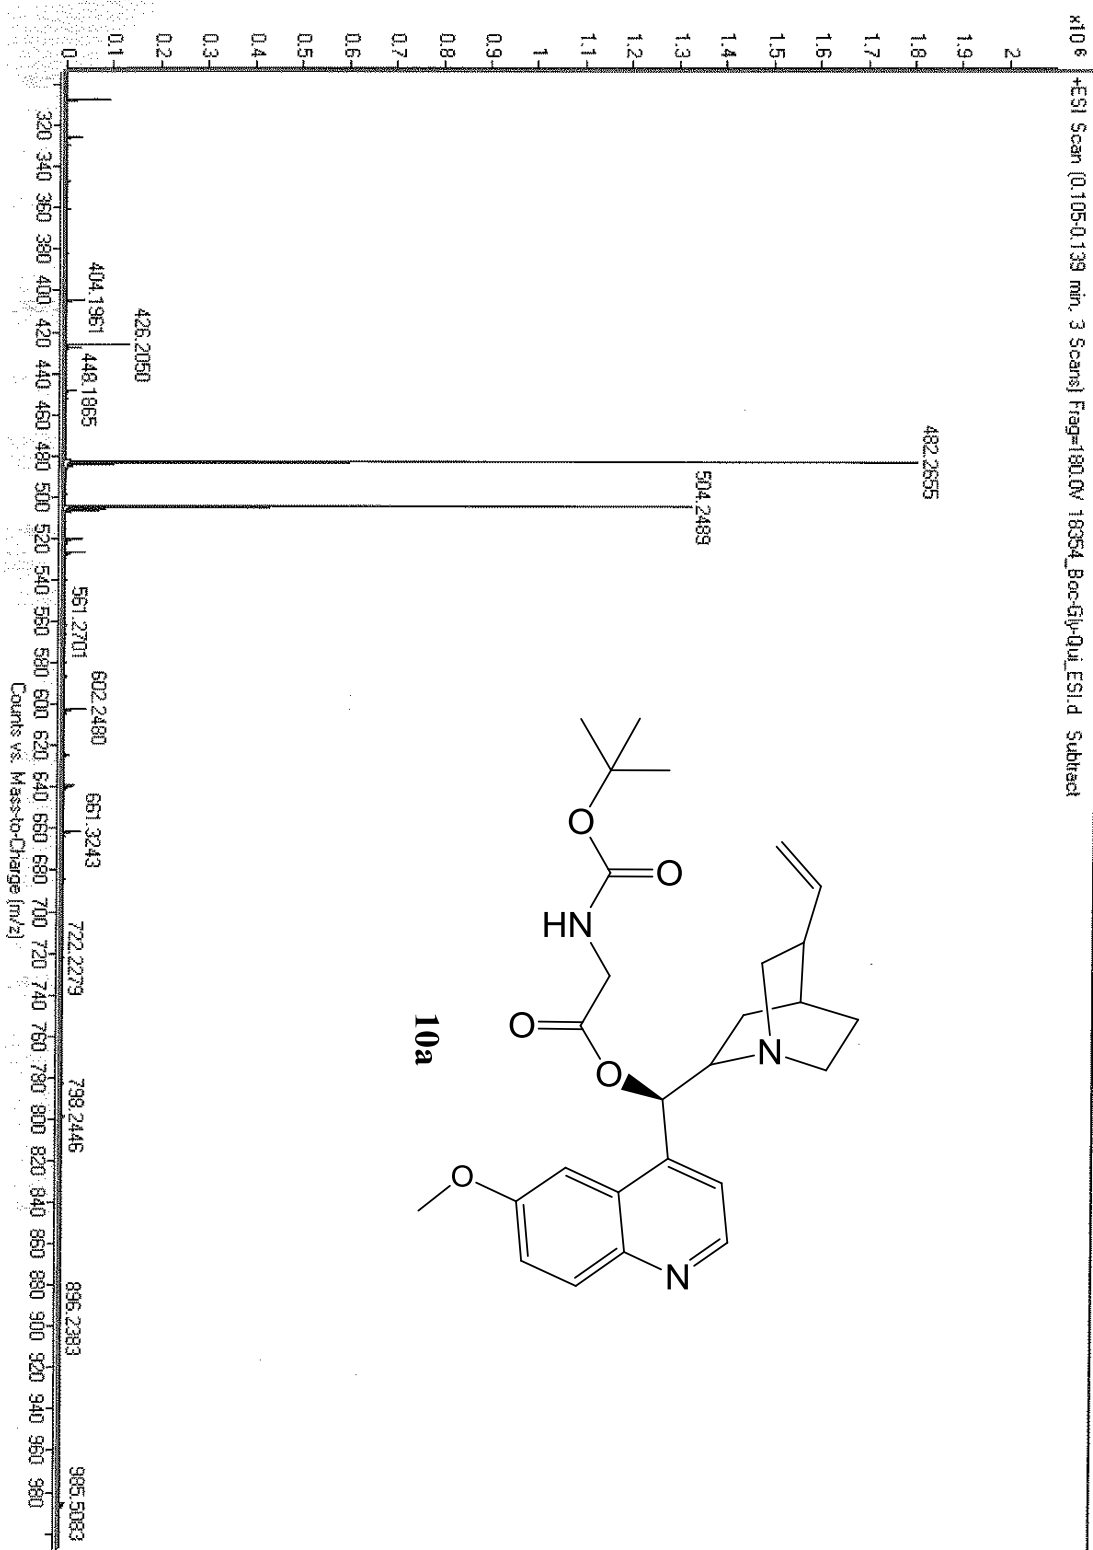

44

### Zoom-In View

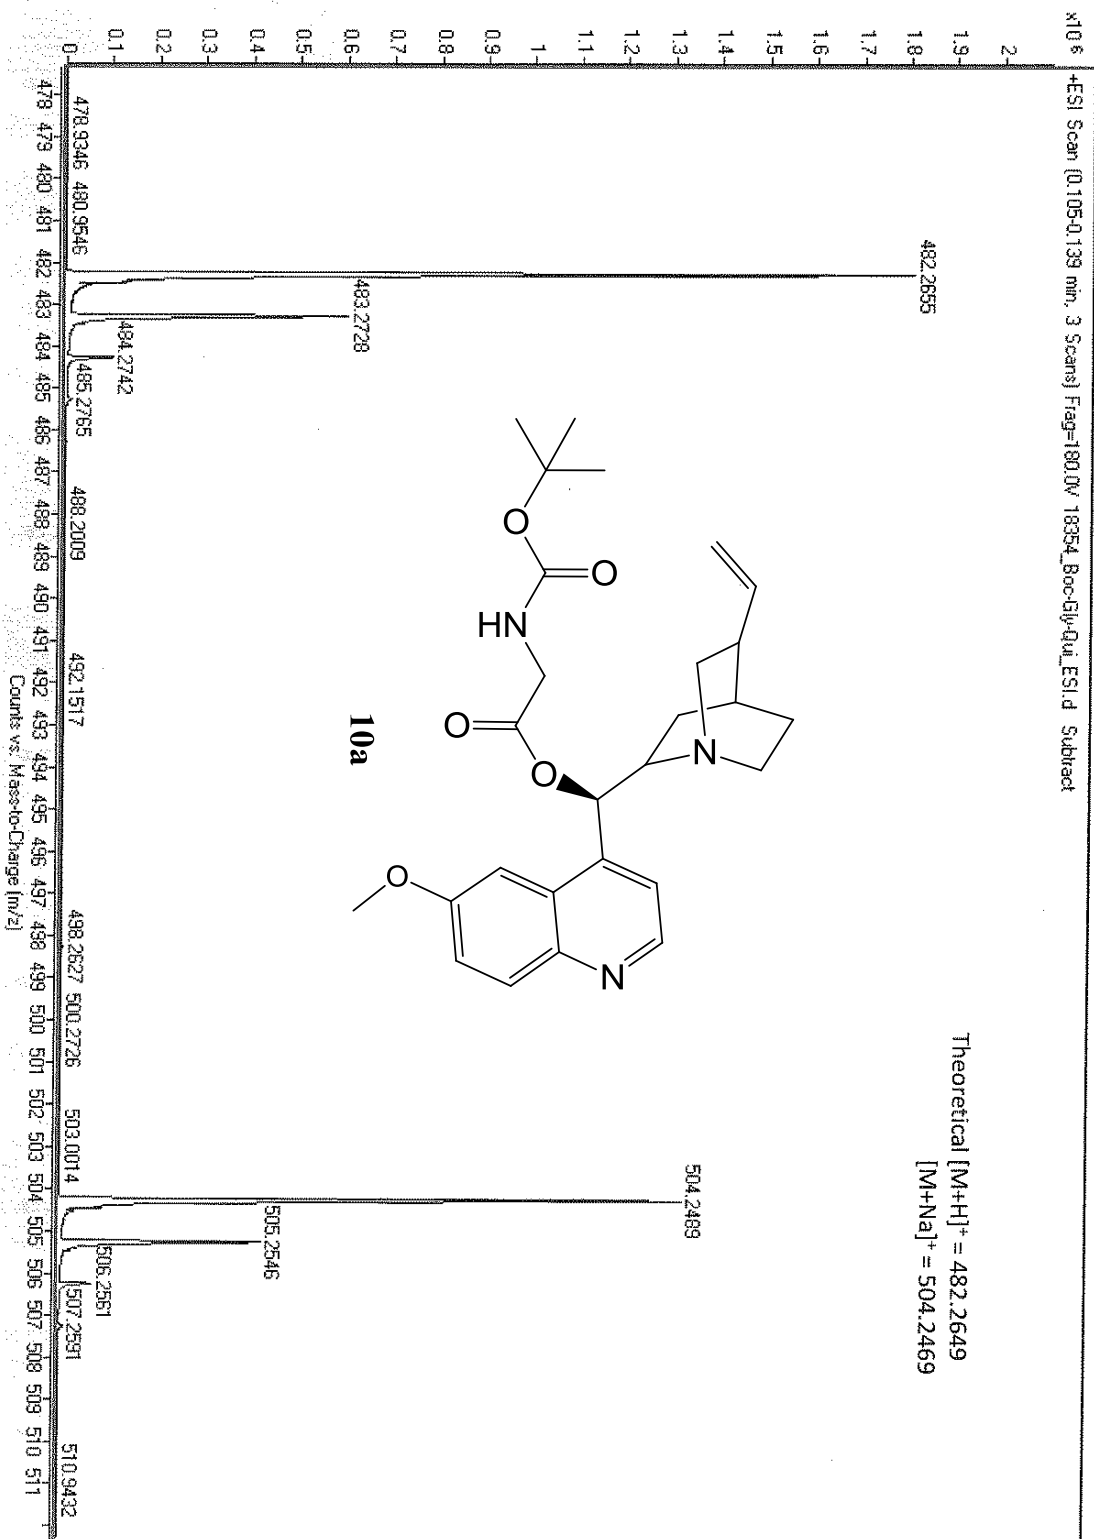

SK

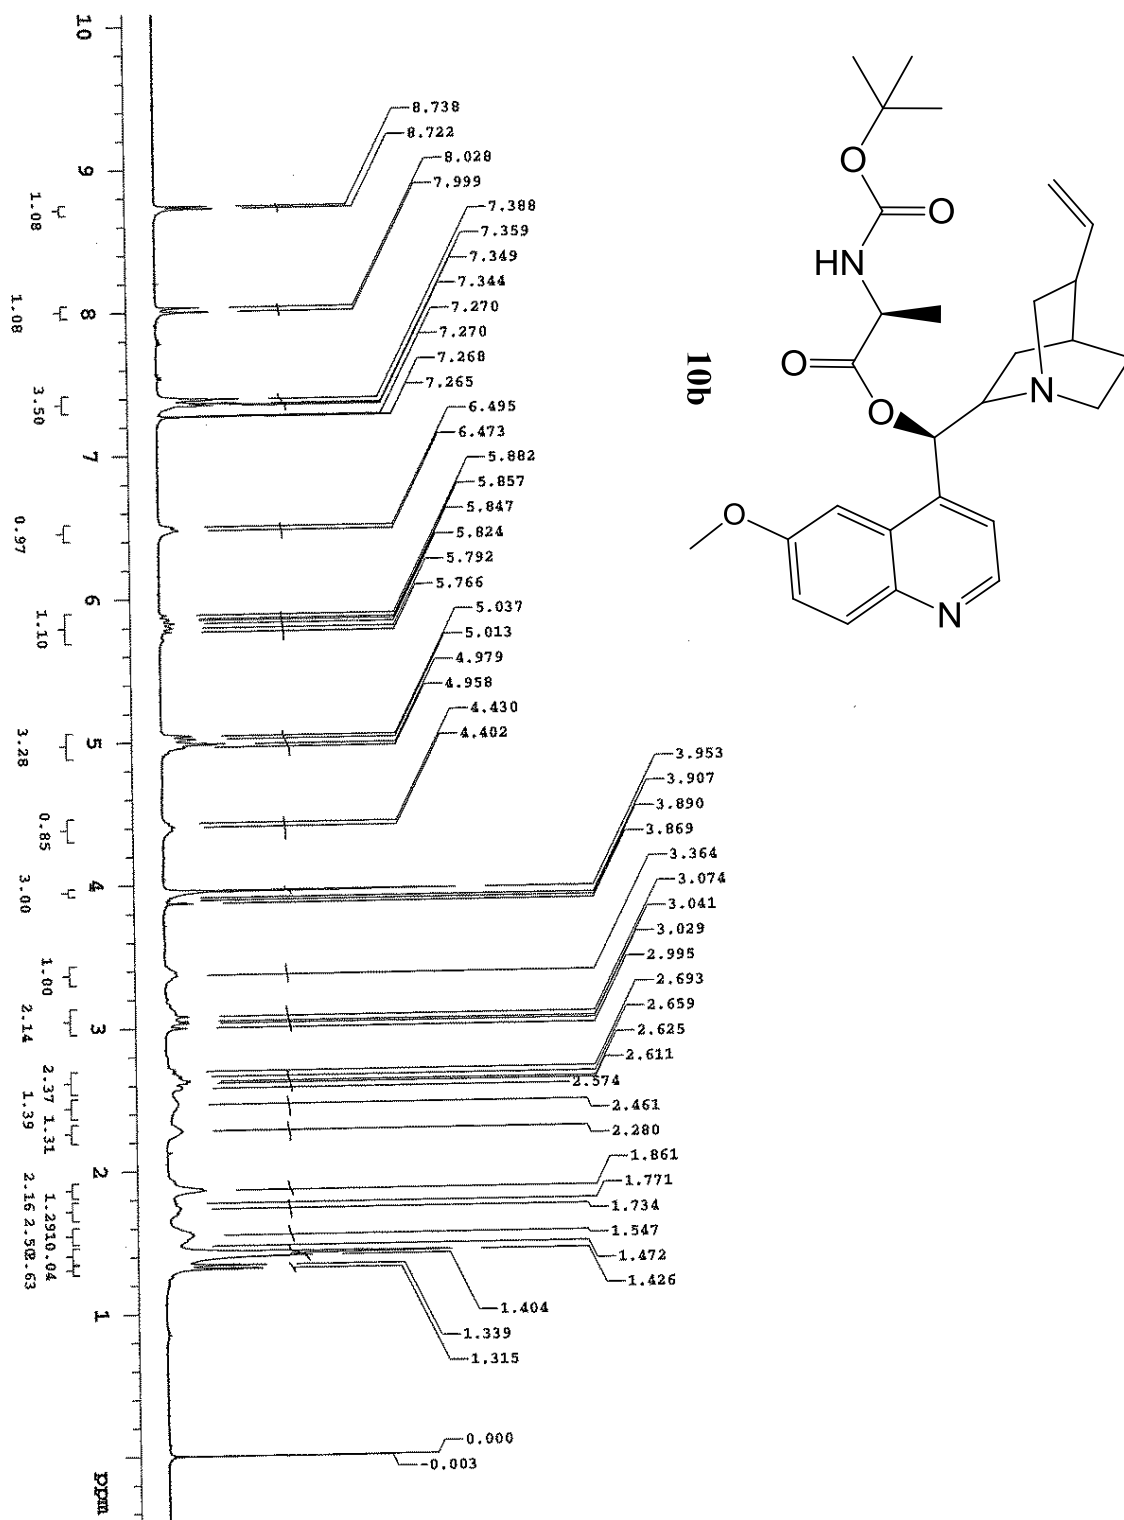

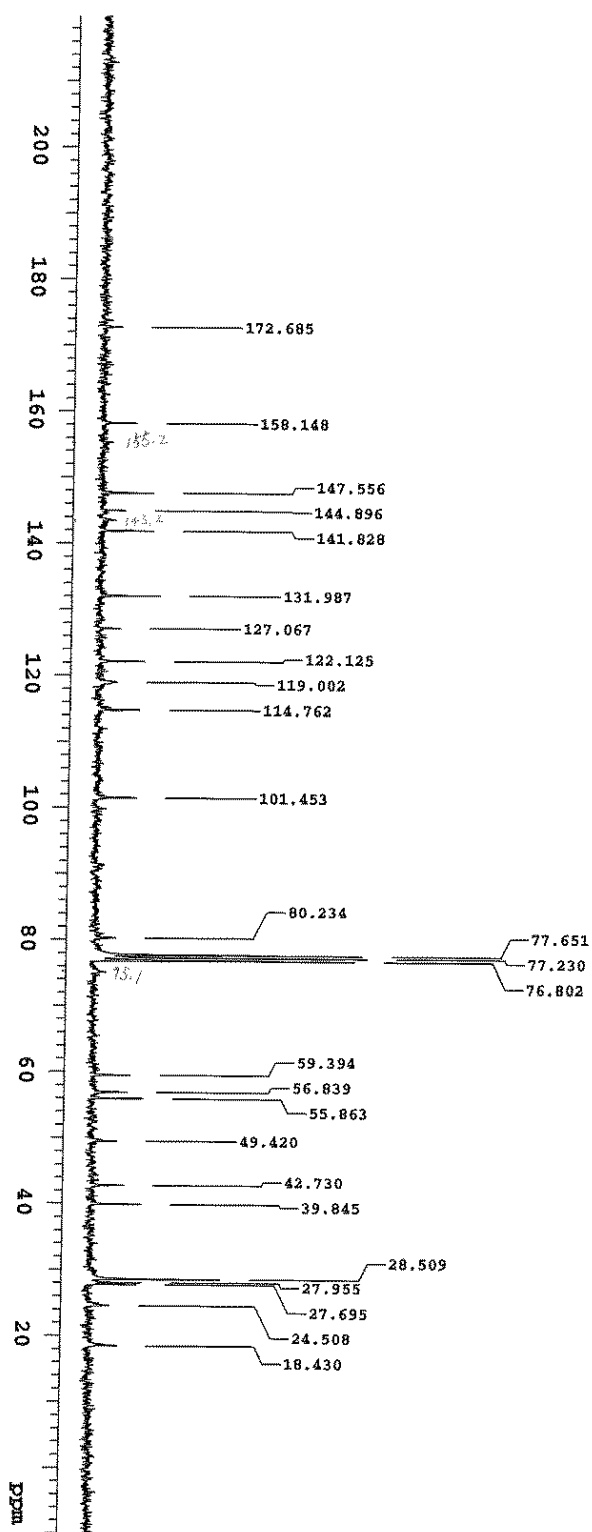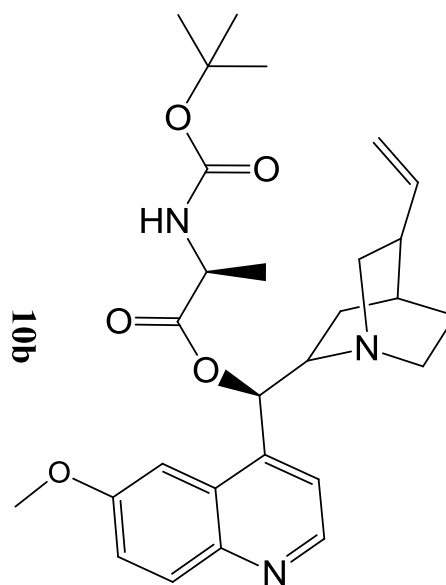

# Full mass spectrum

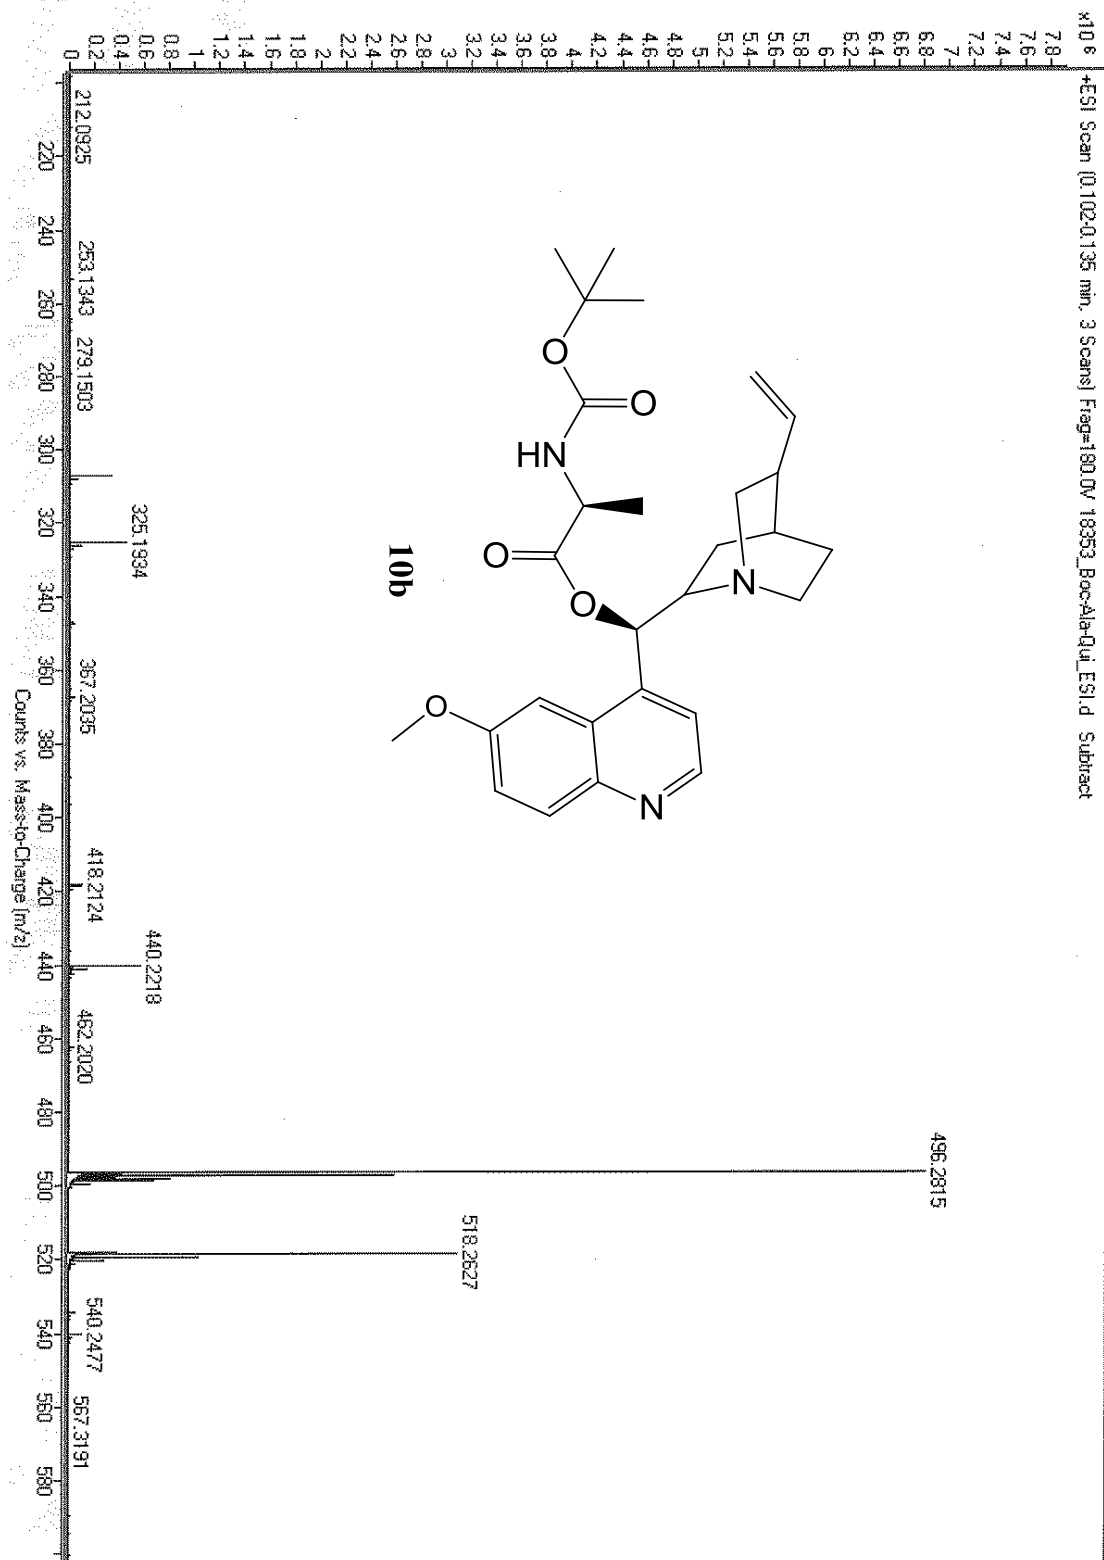

### Zoom-In View

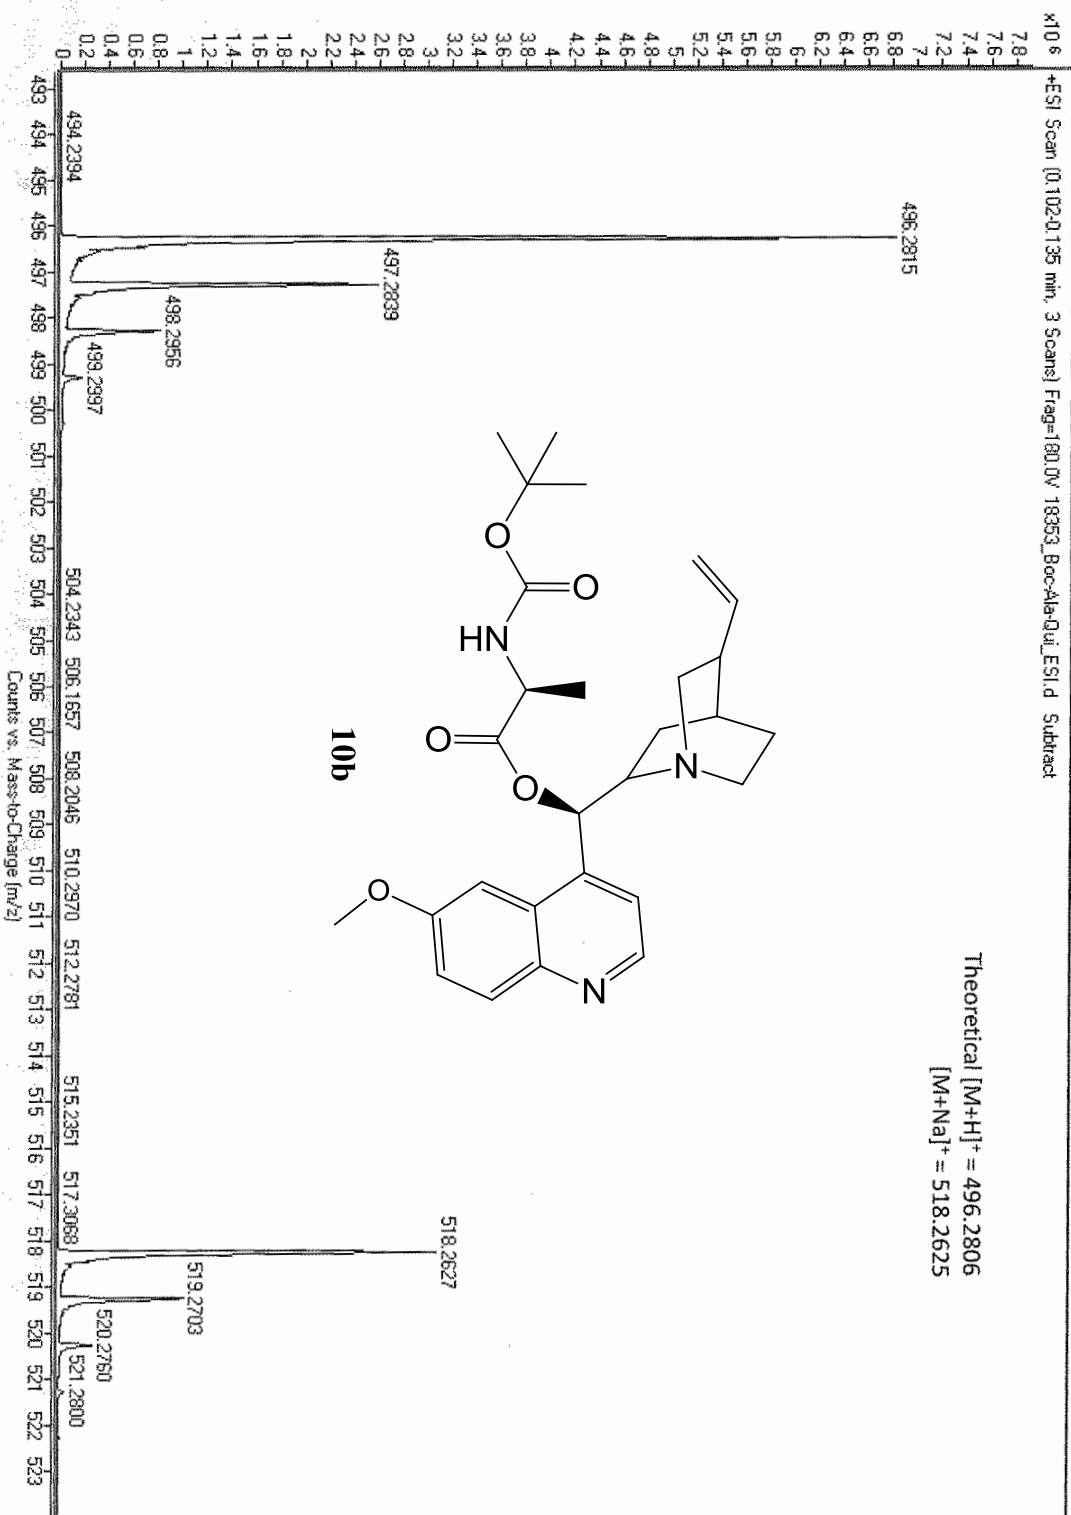

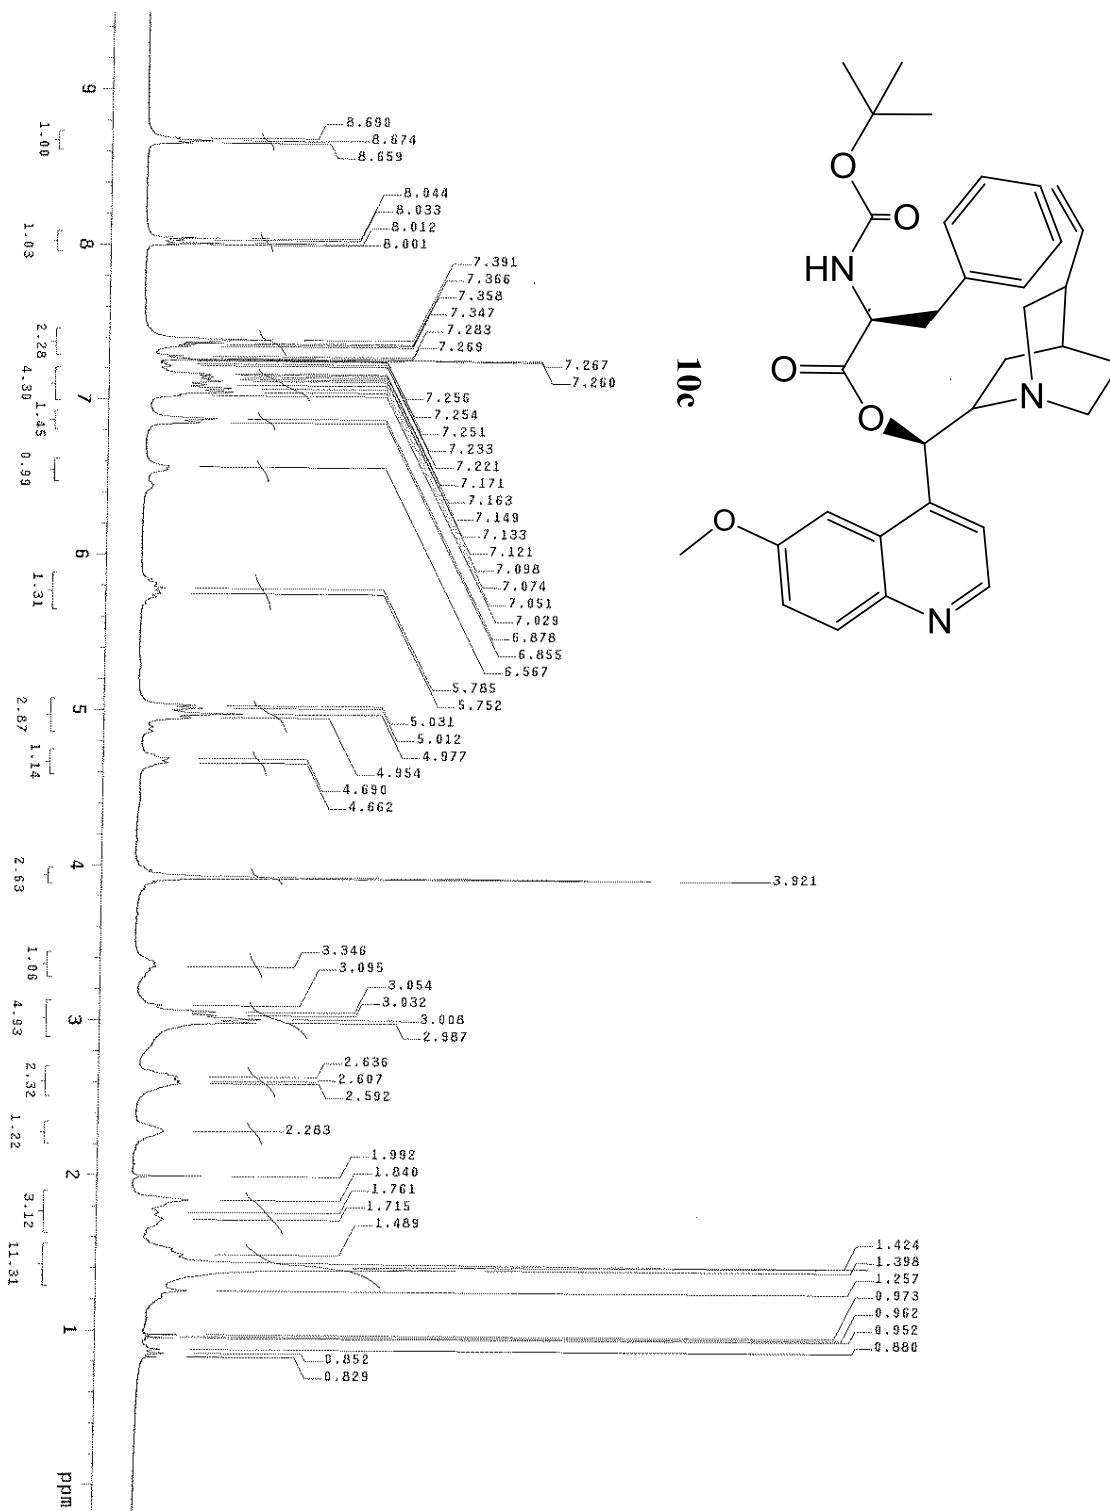



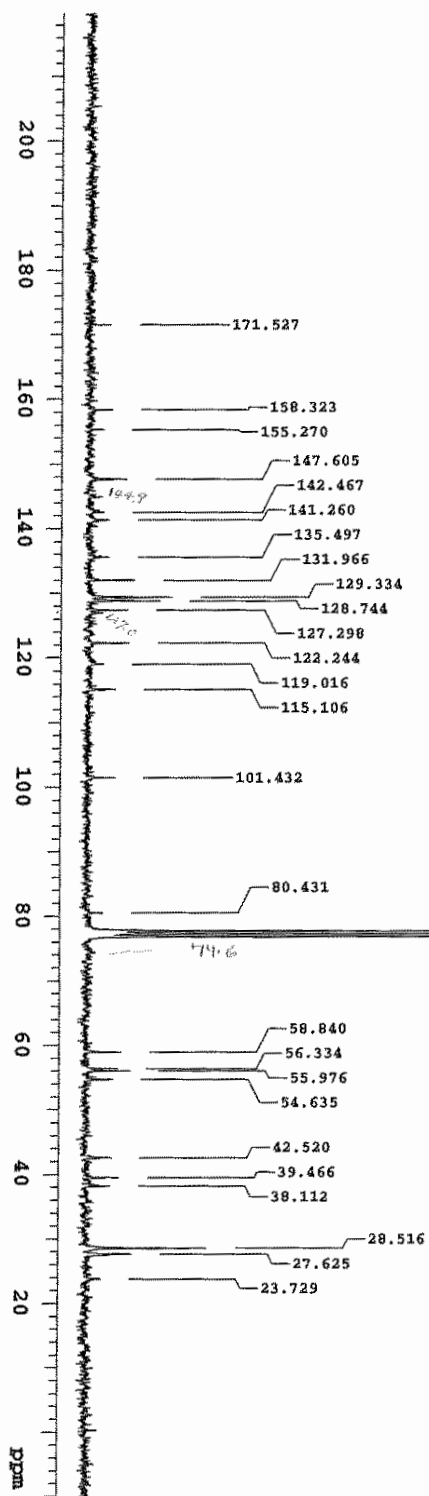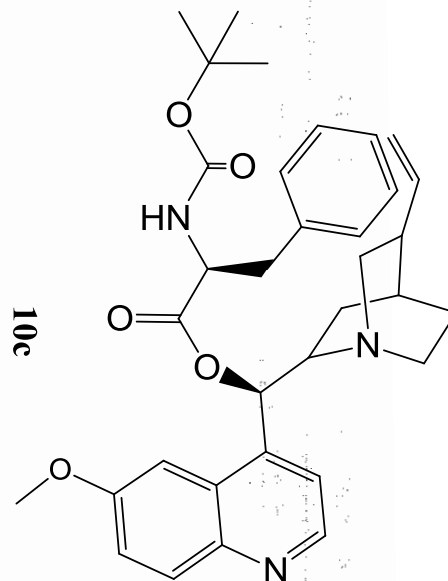

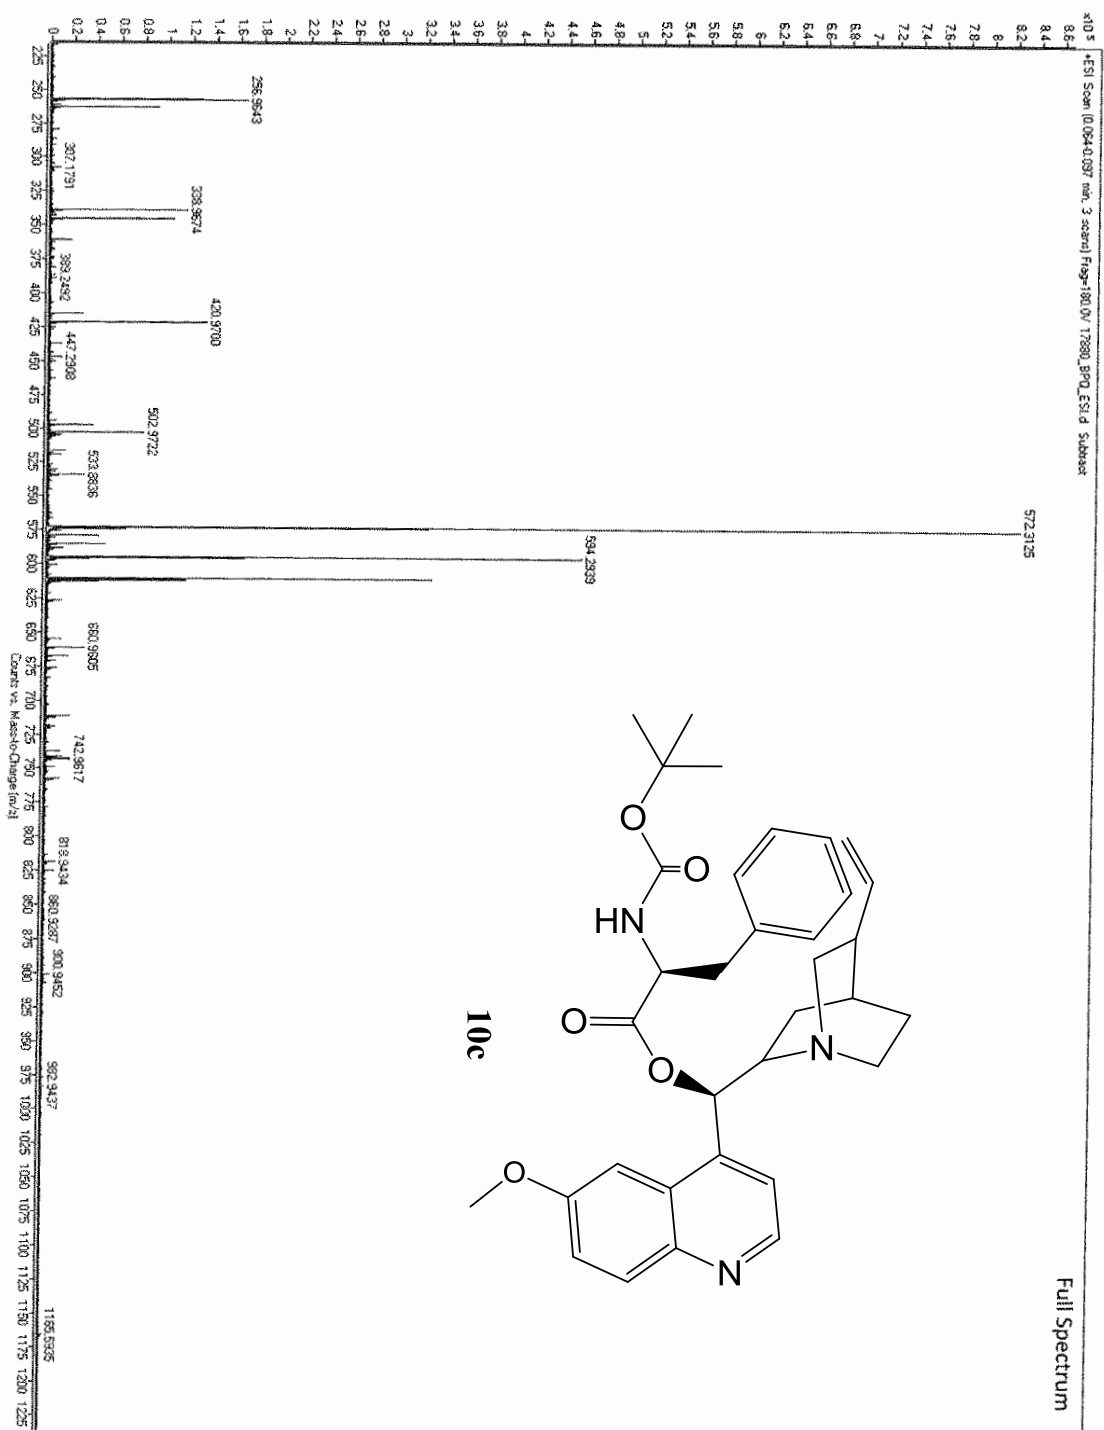

9c

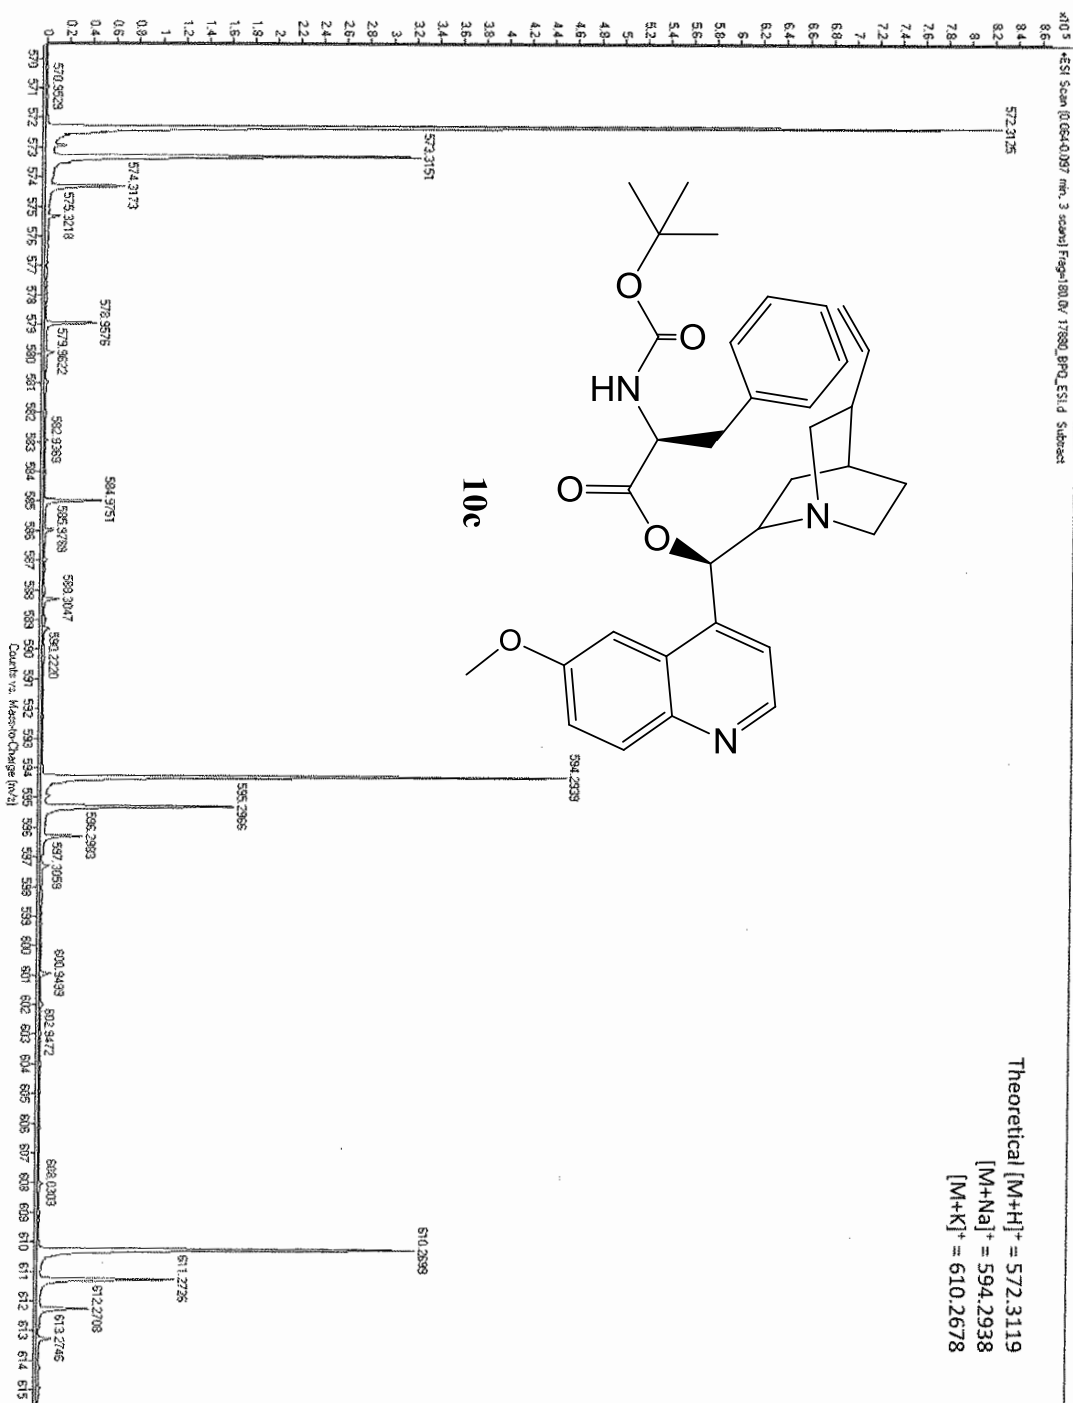

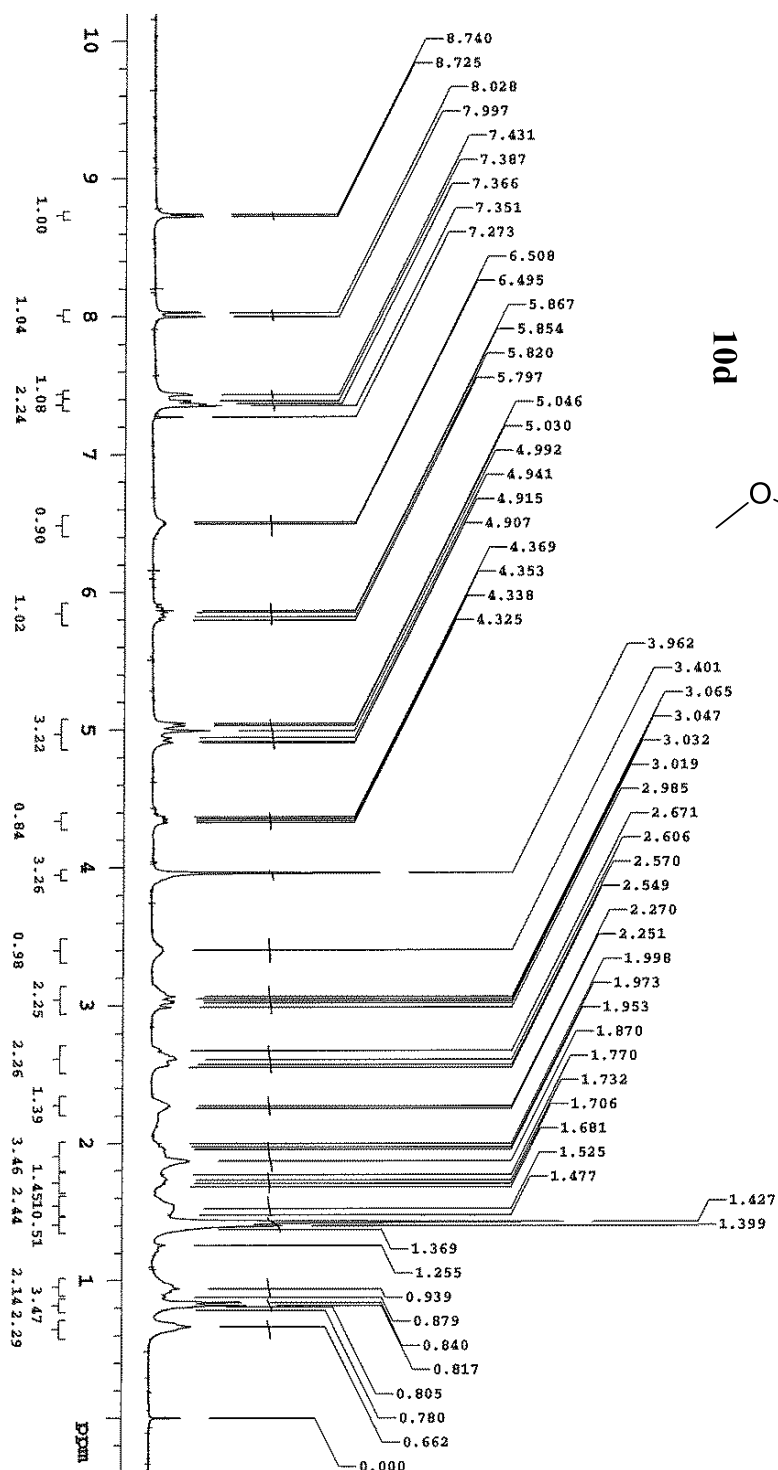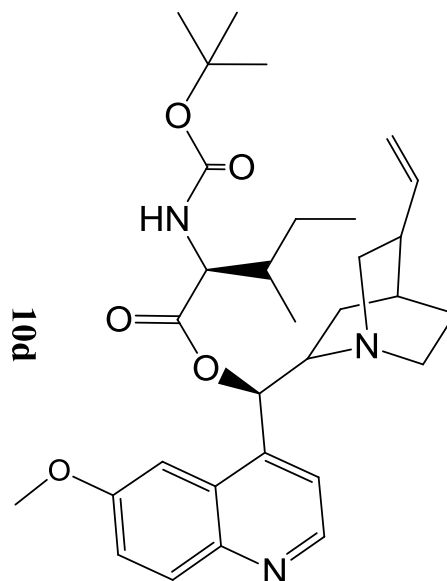

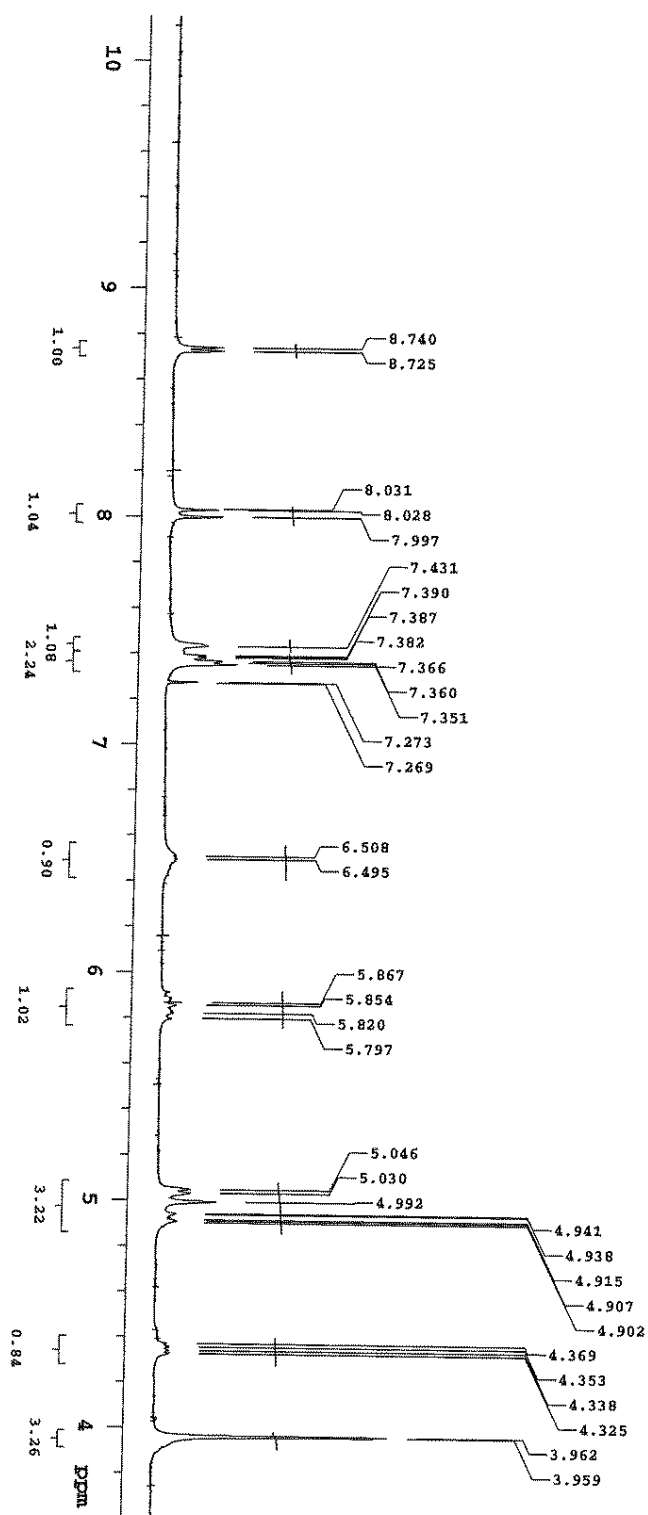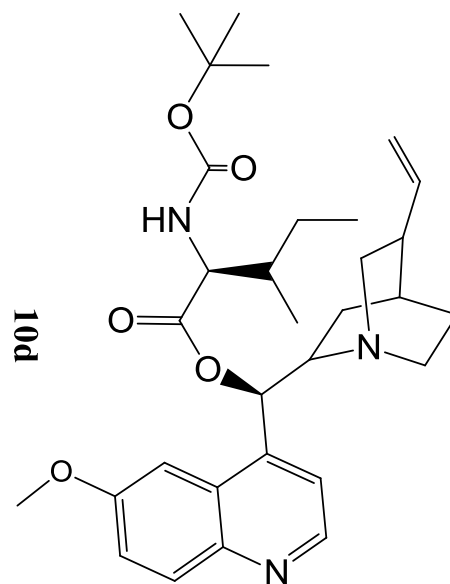

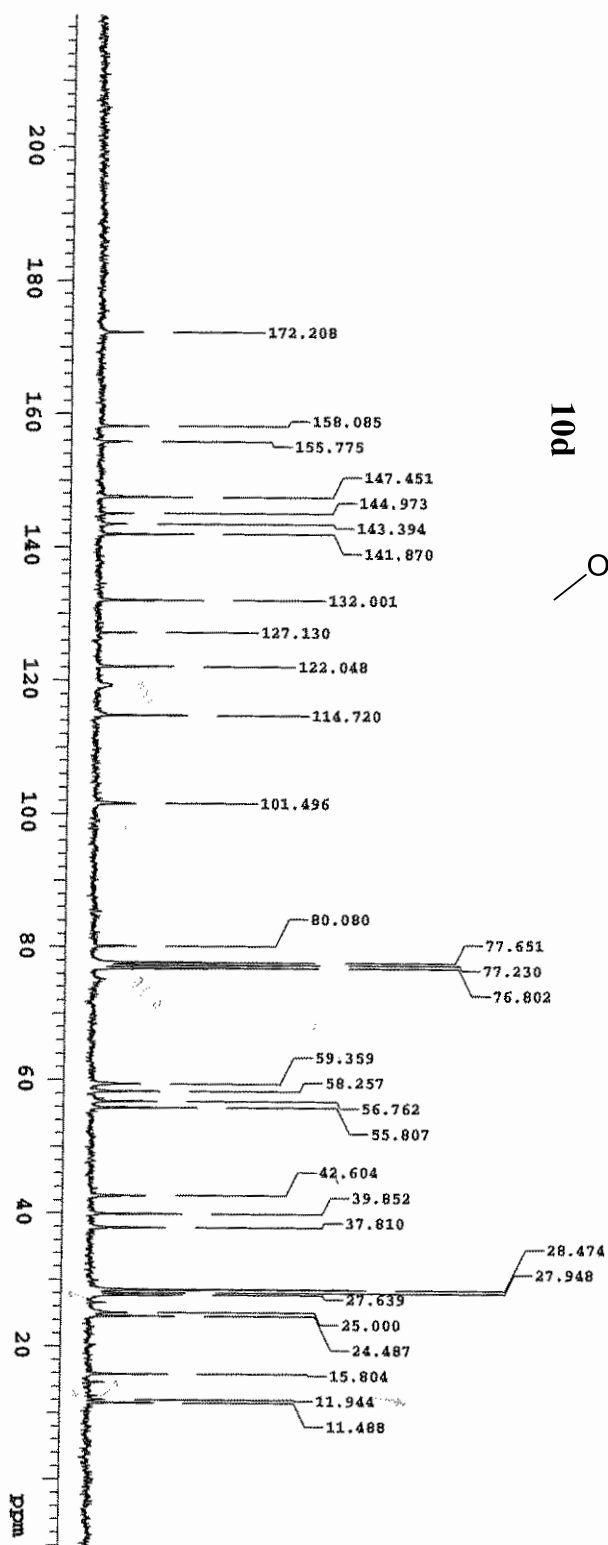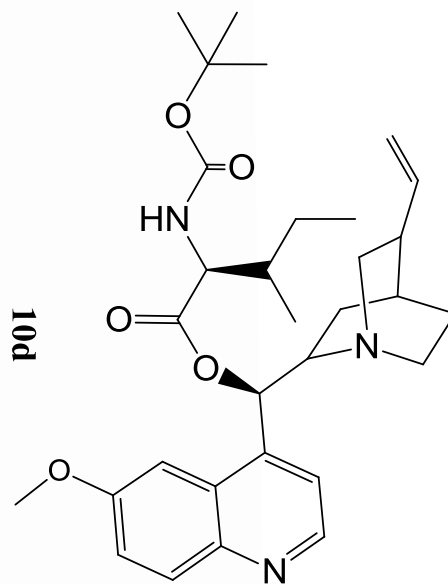

# Full mass spectrum

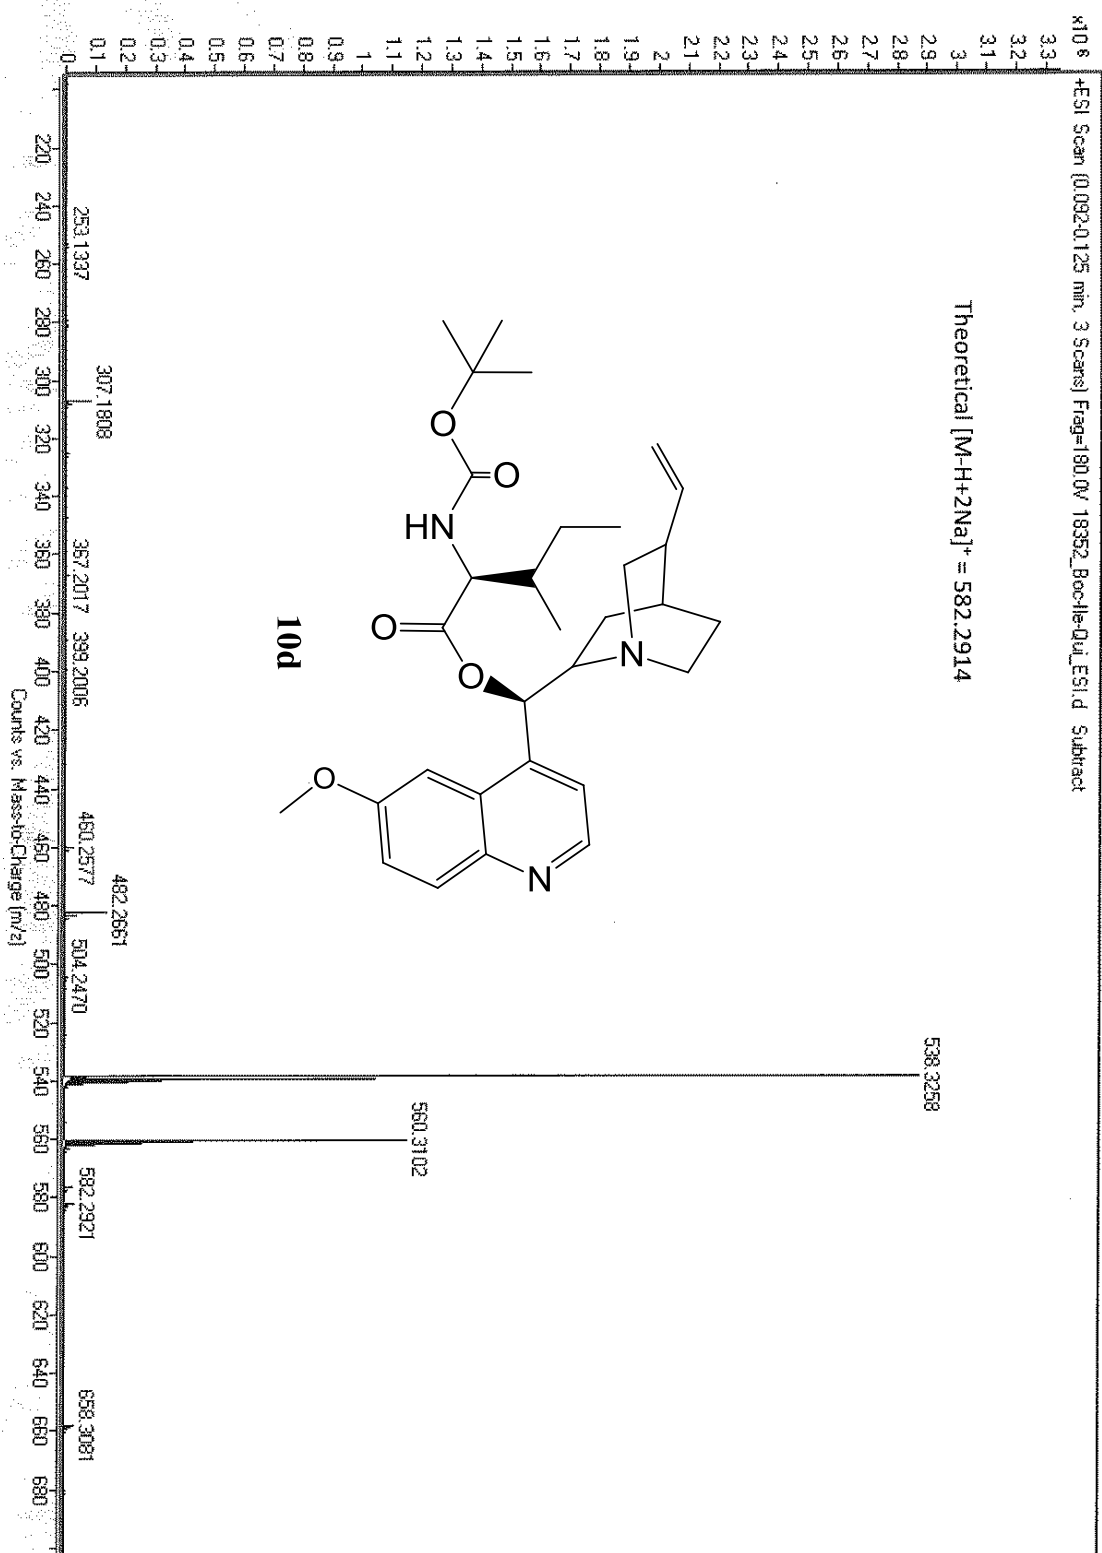

9d

### Zoom-In View

99

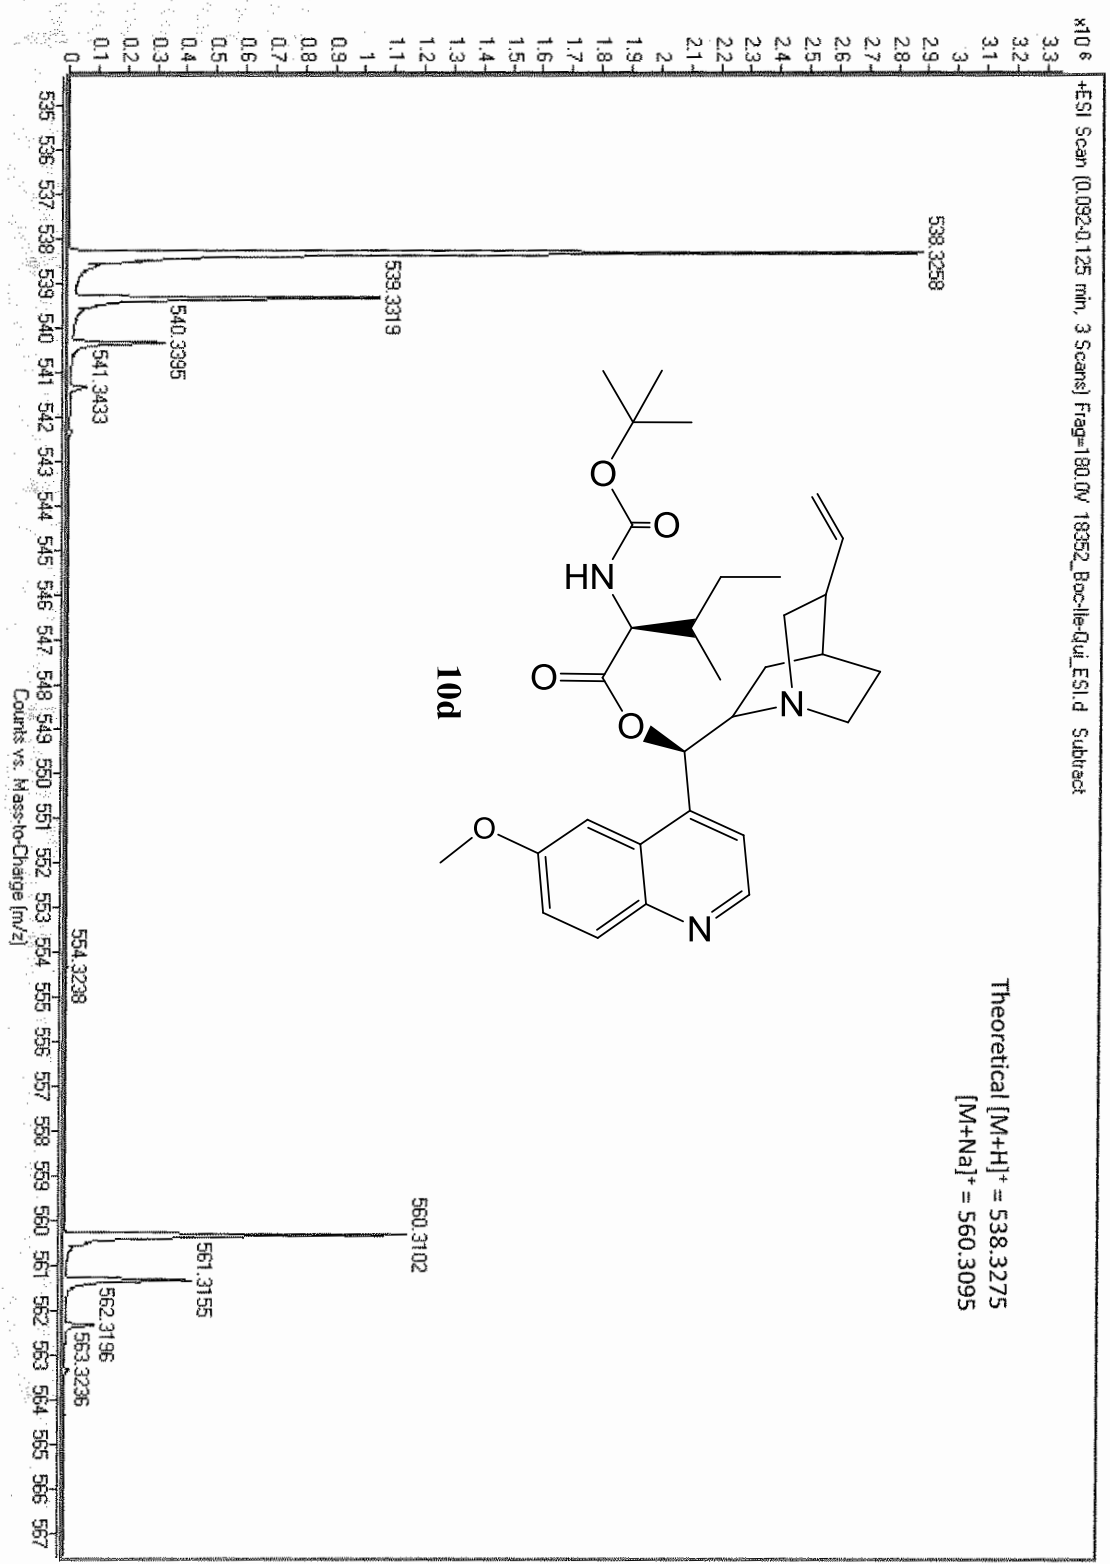



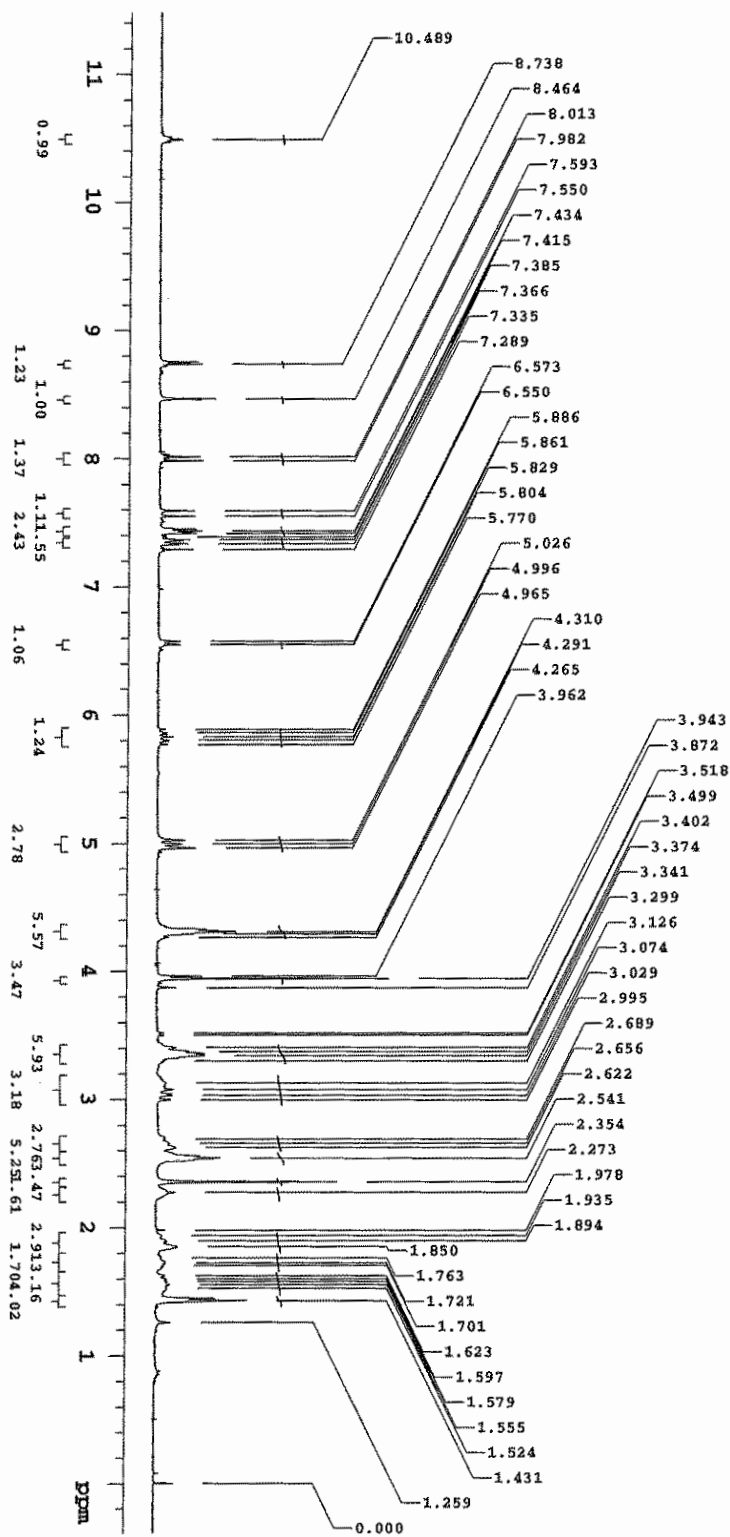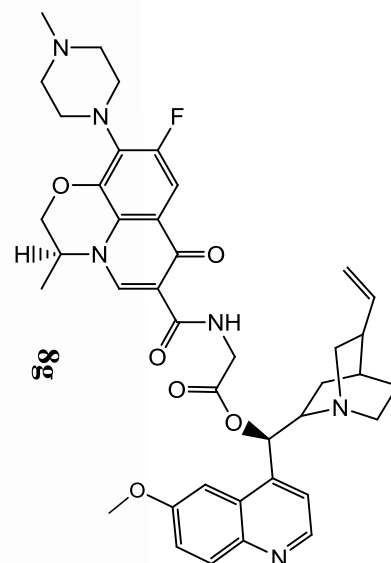

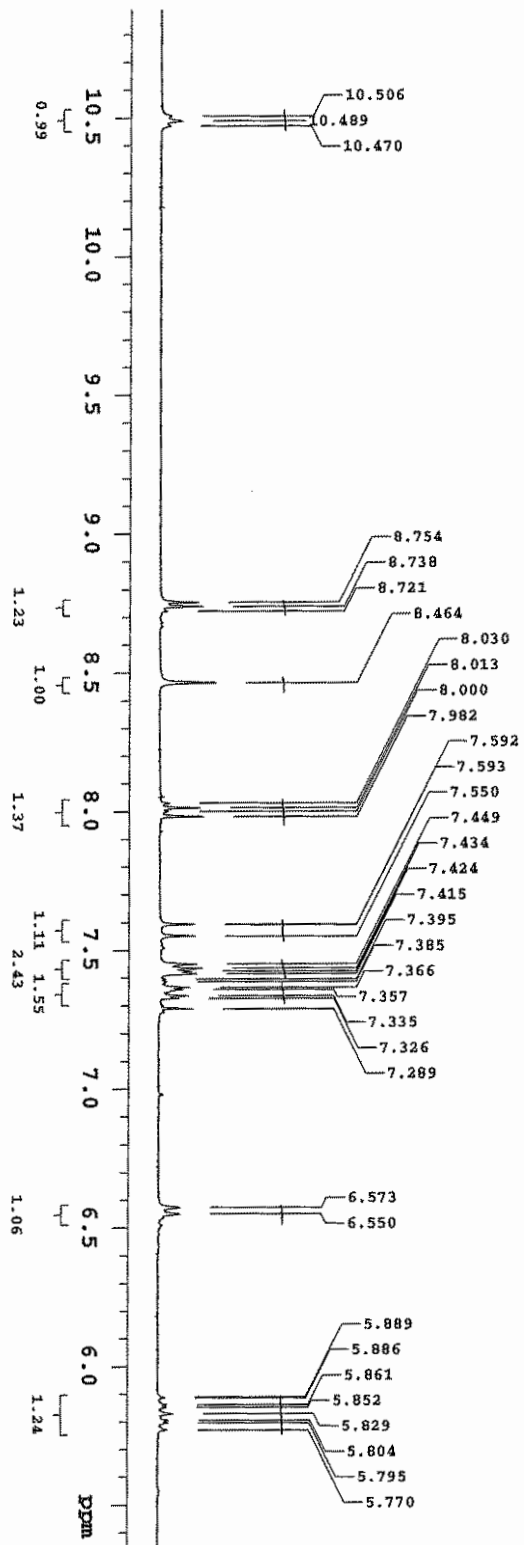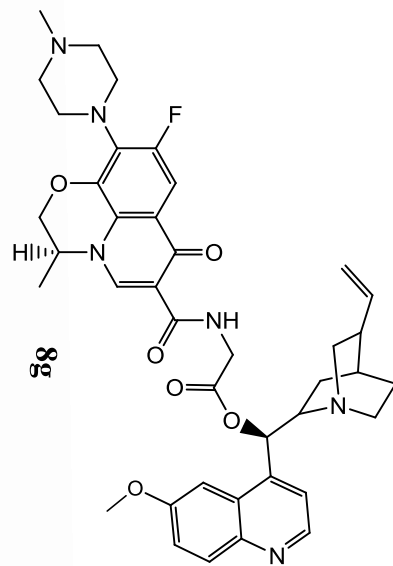

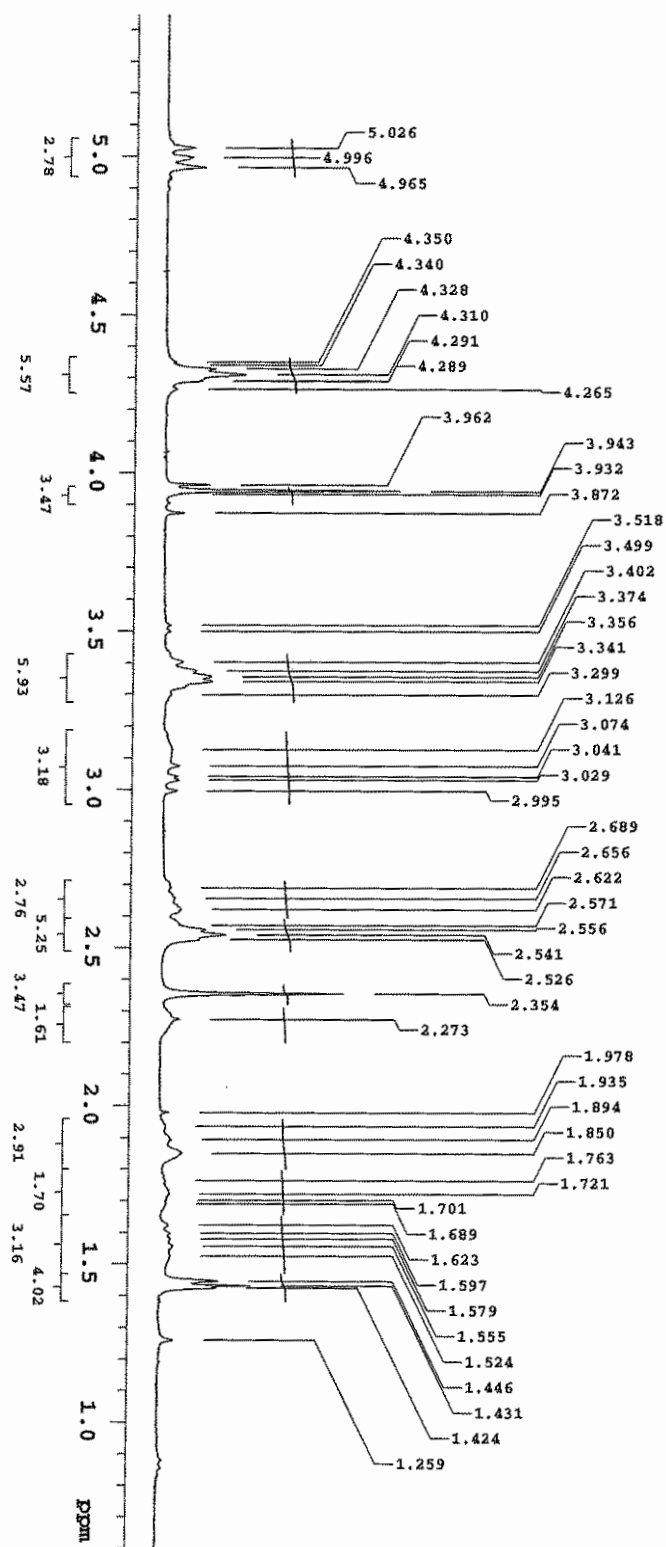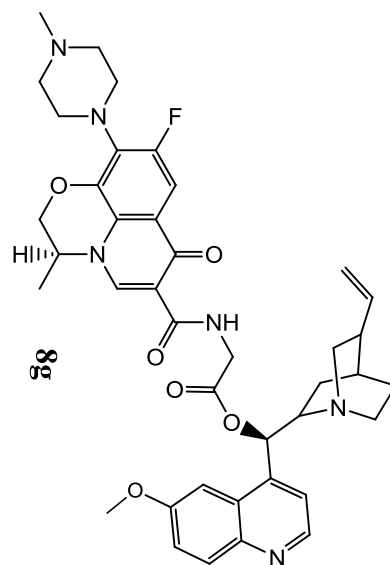

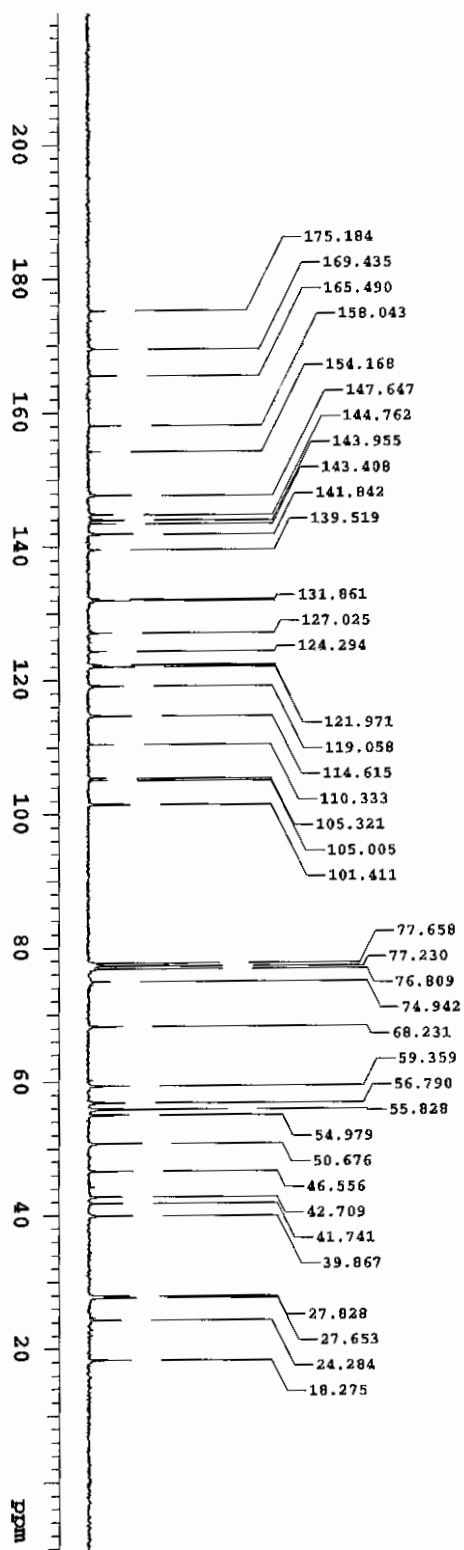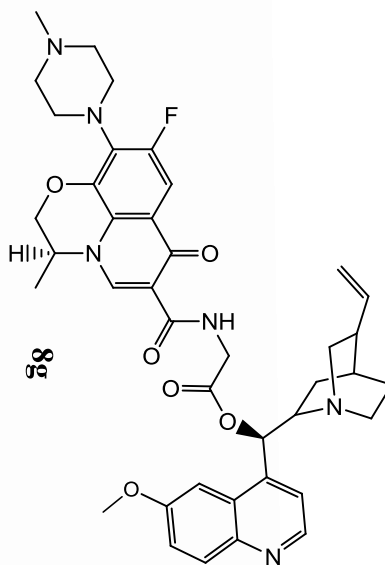

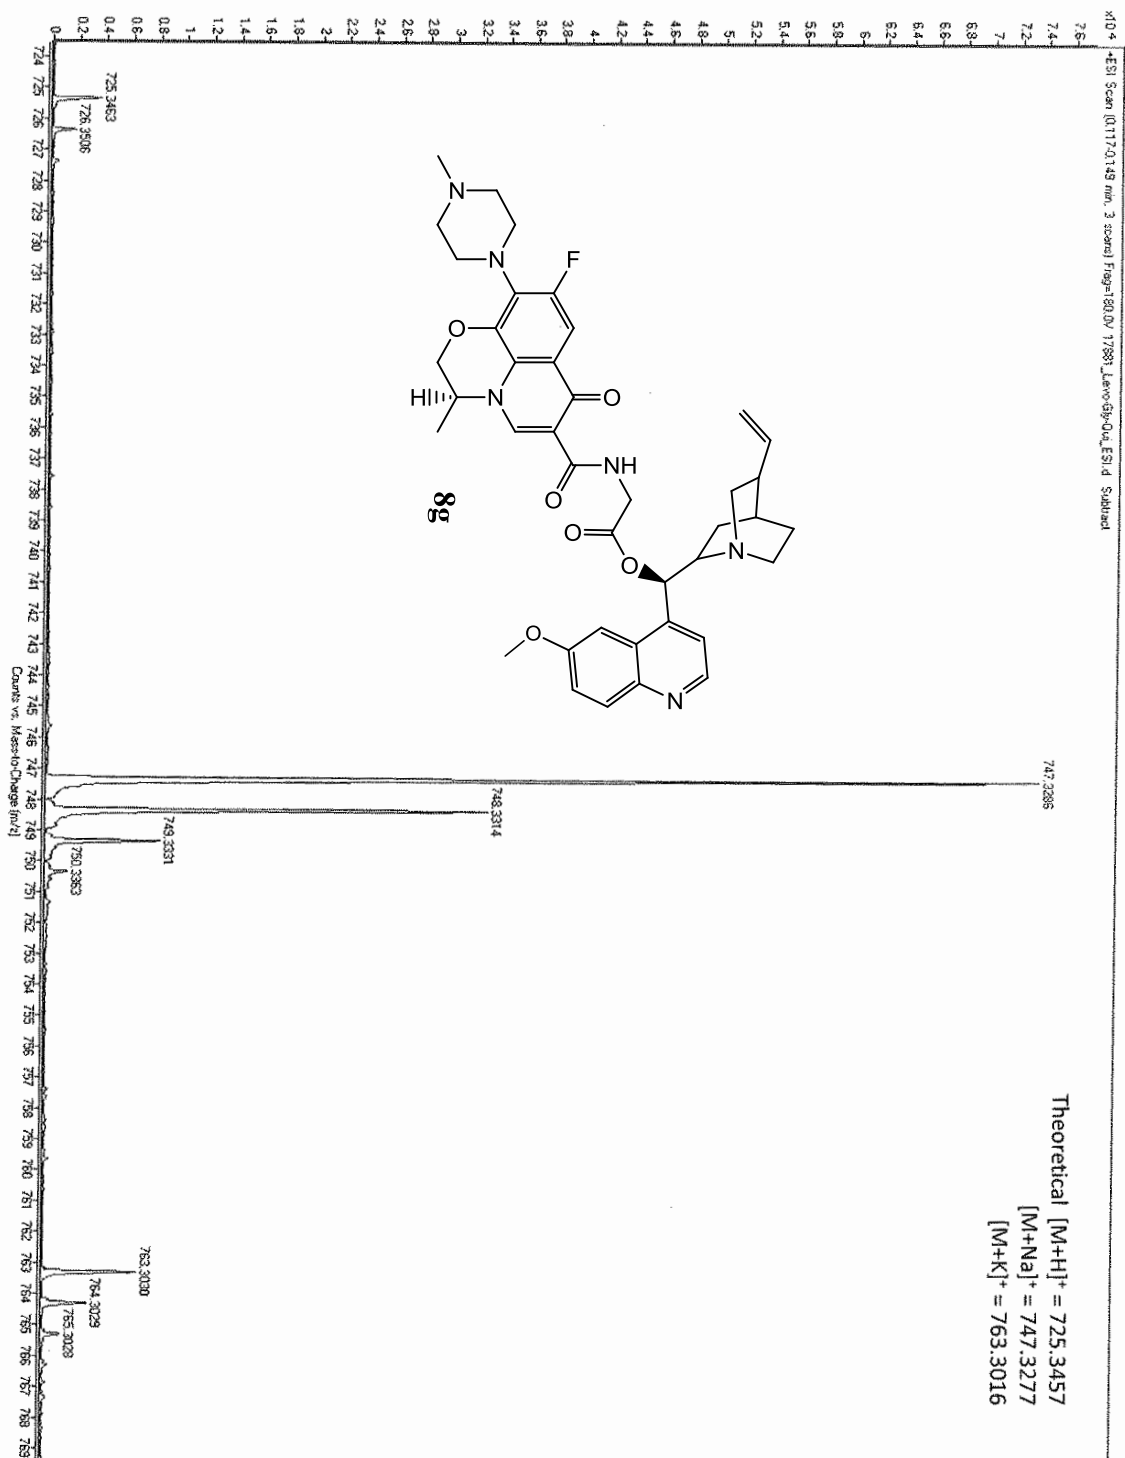

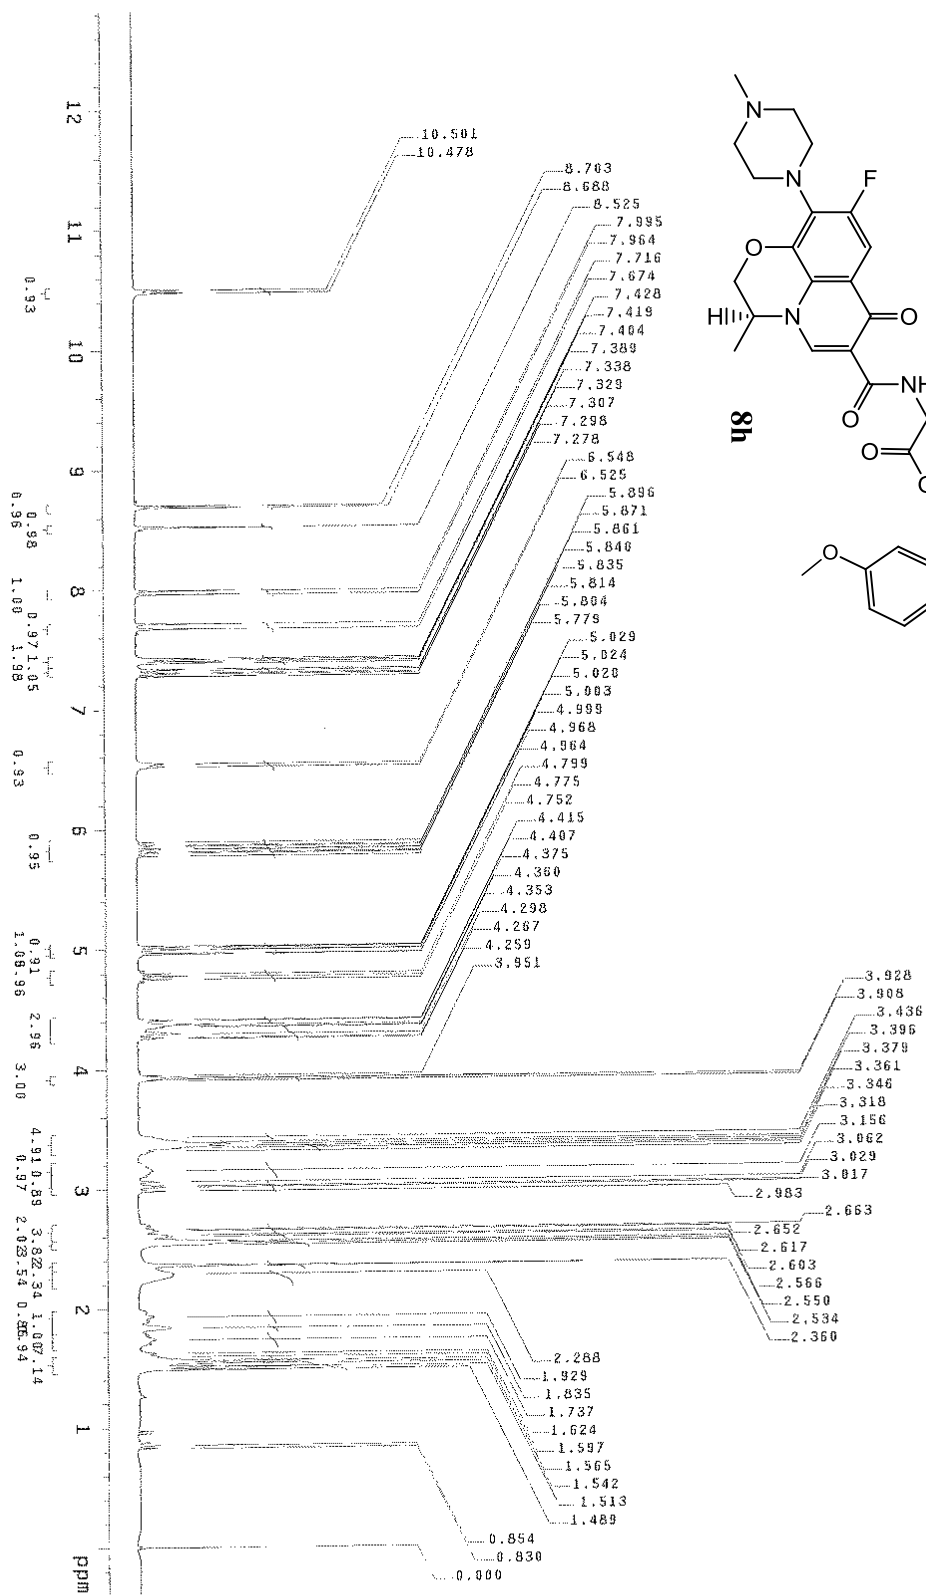

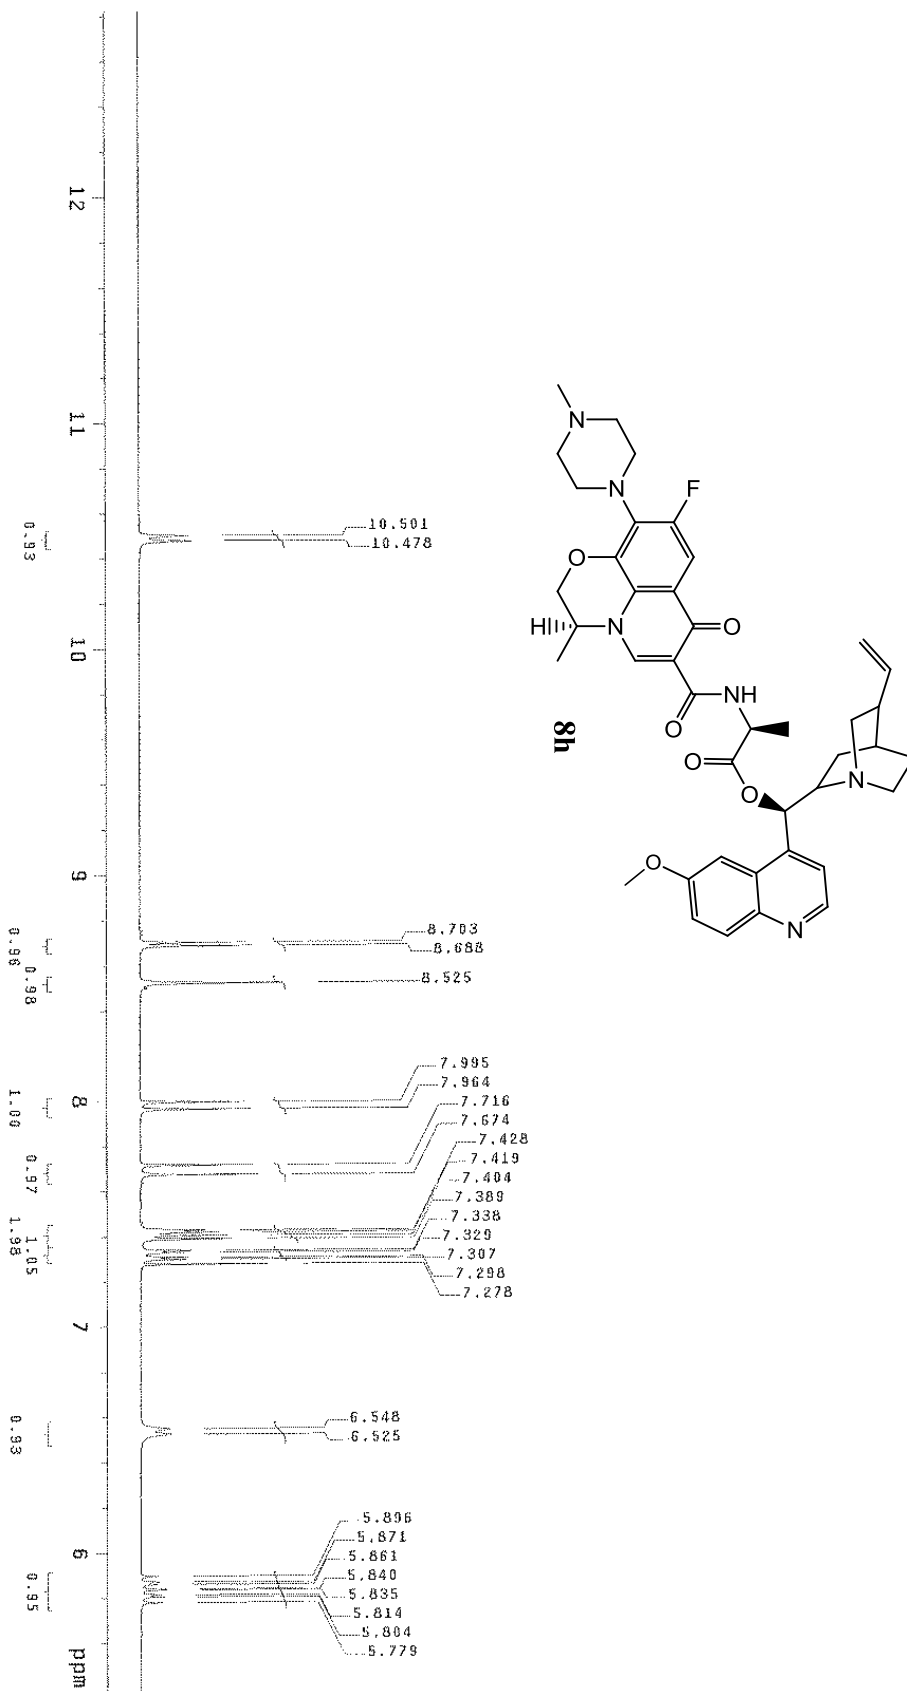

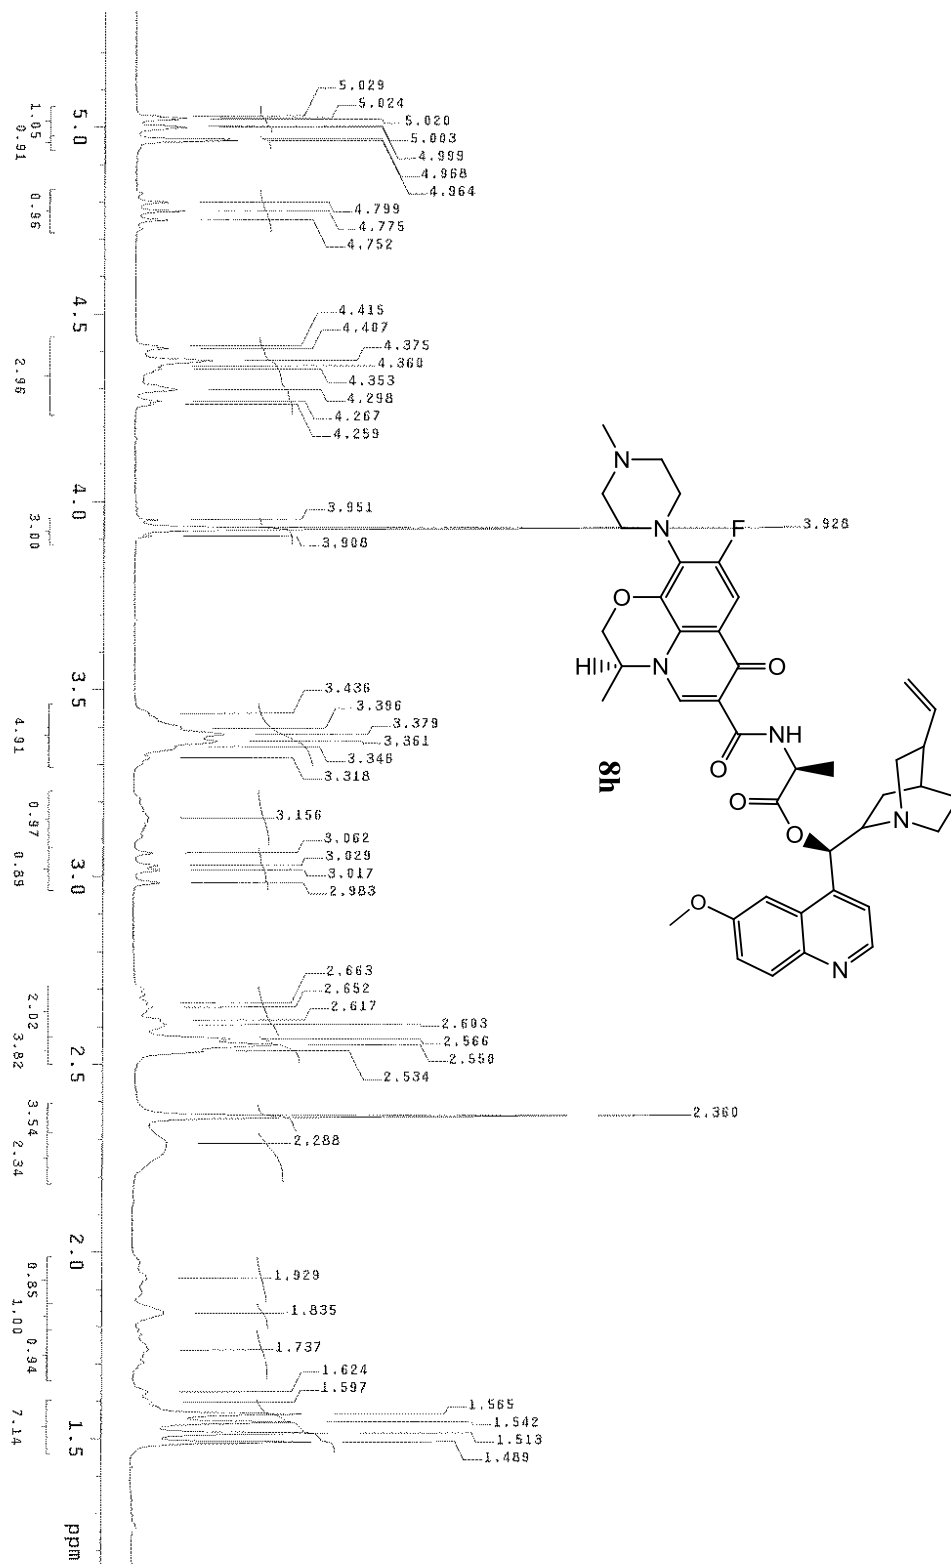



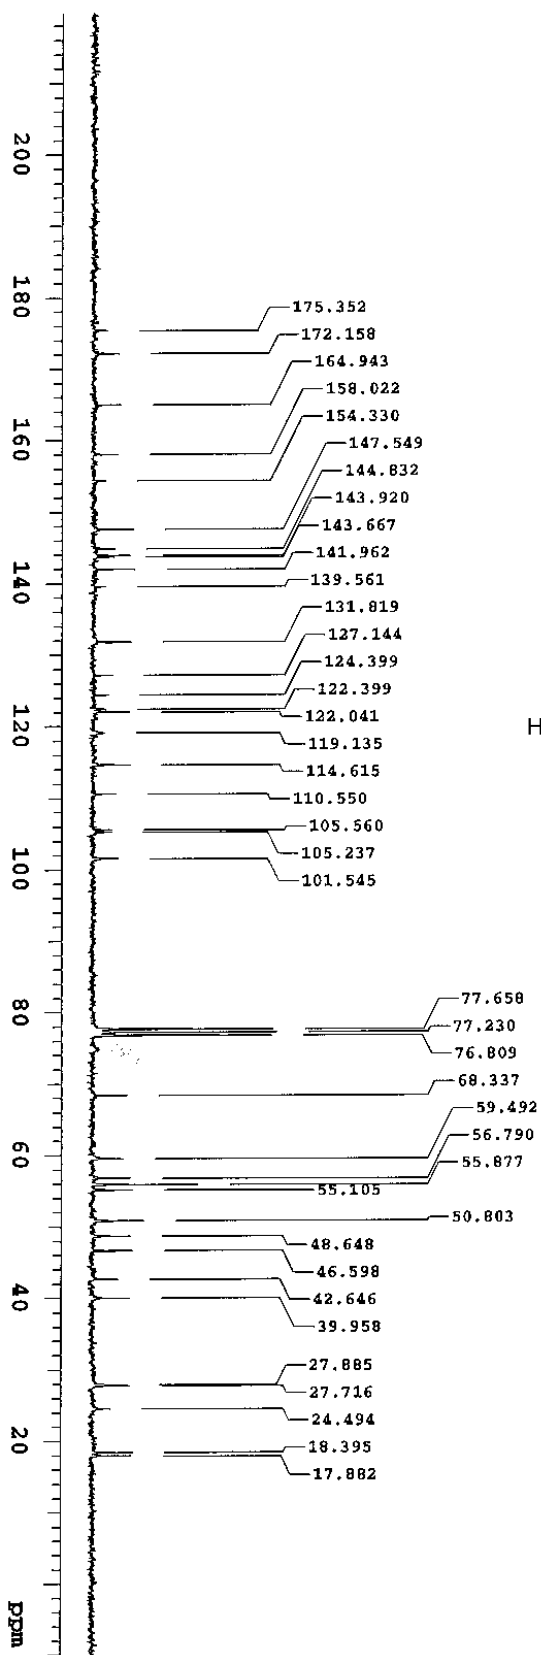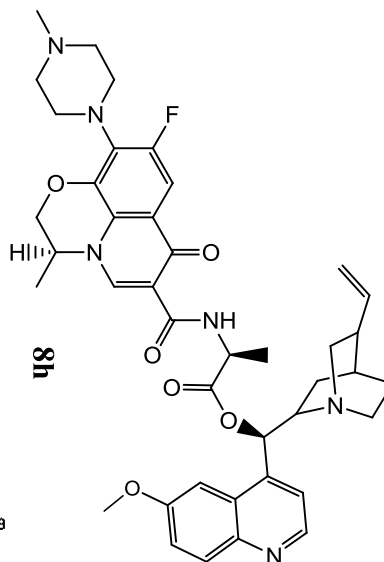

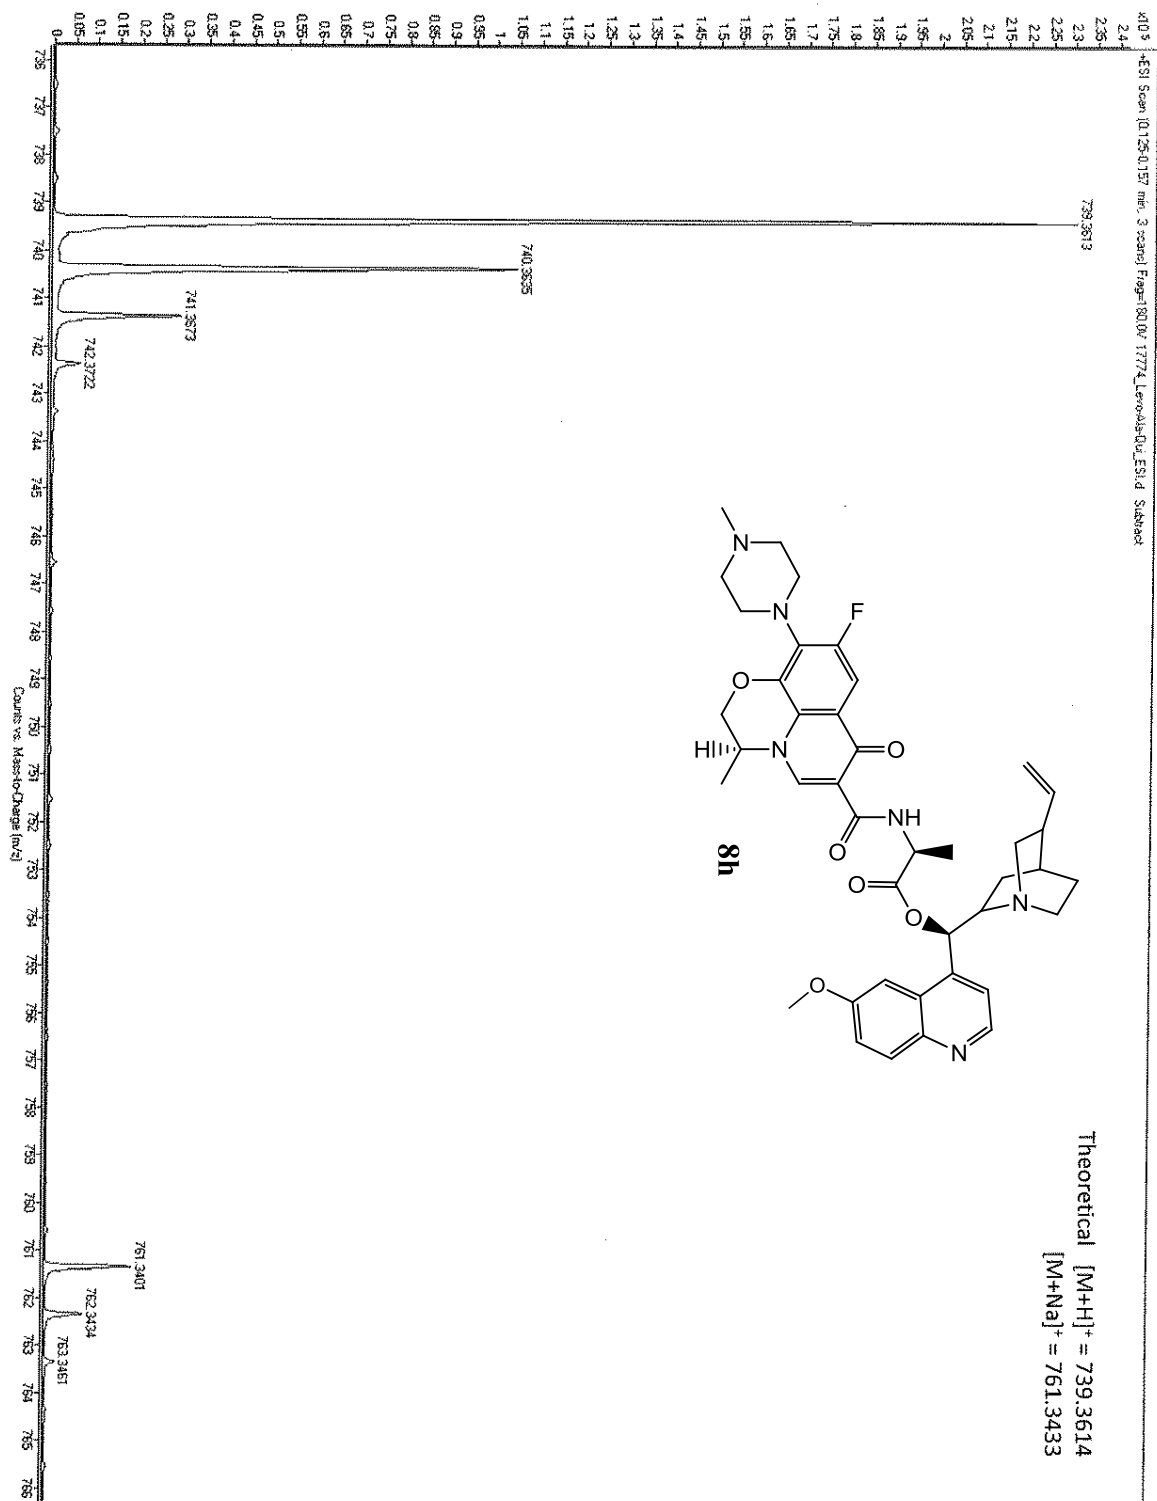

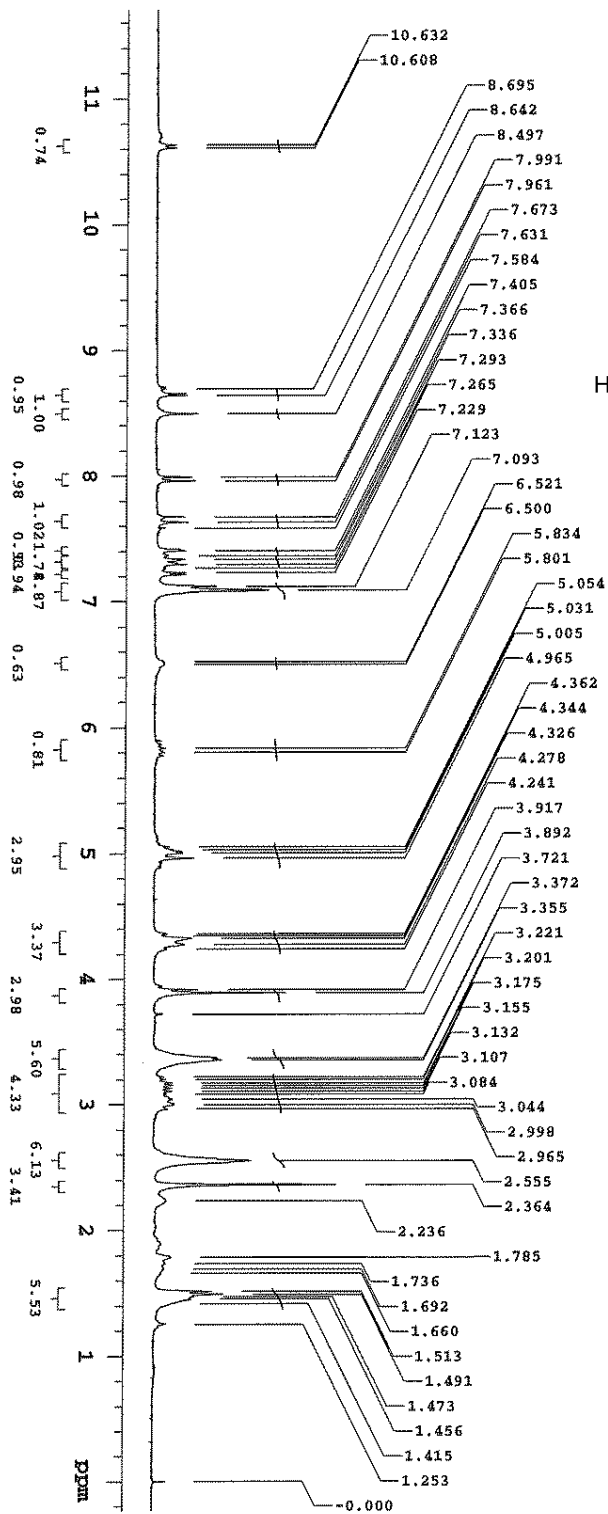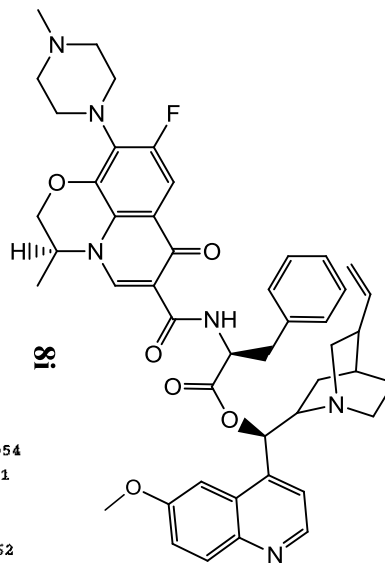

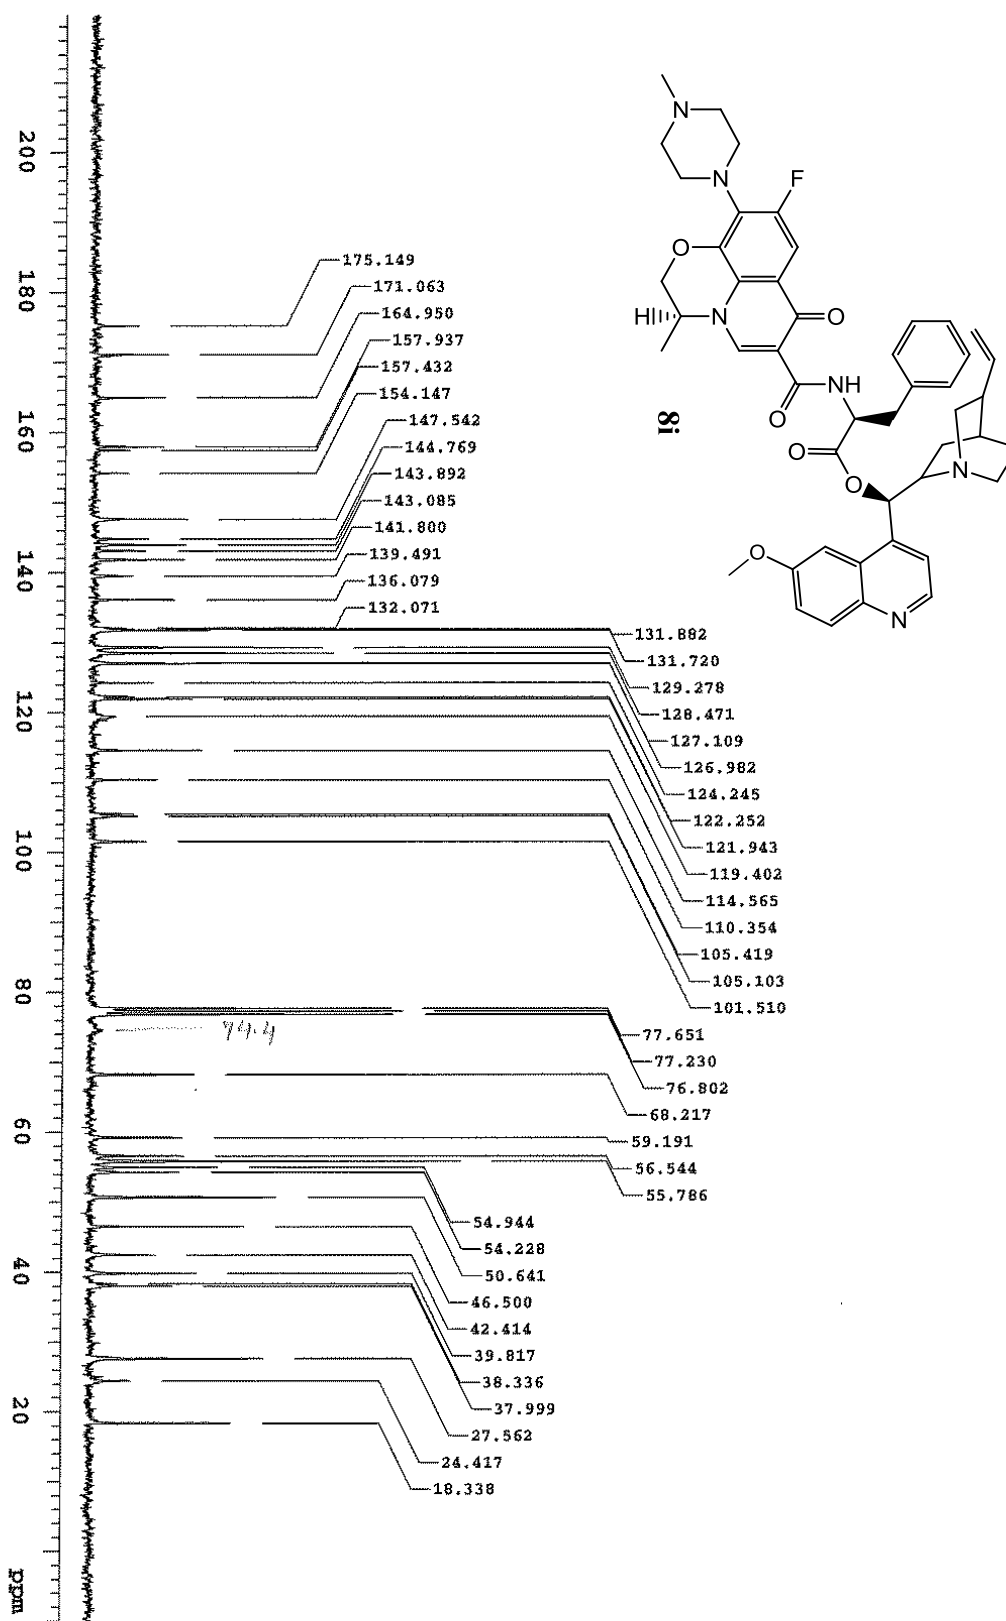

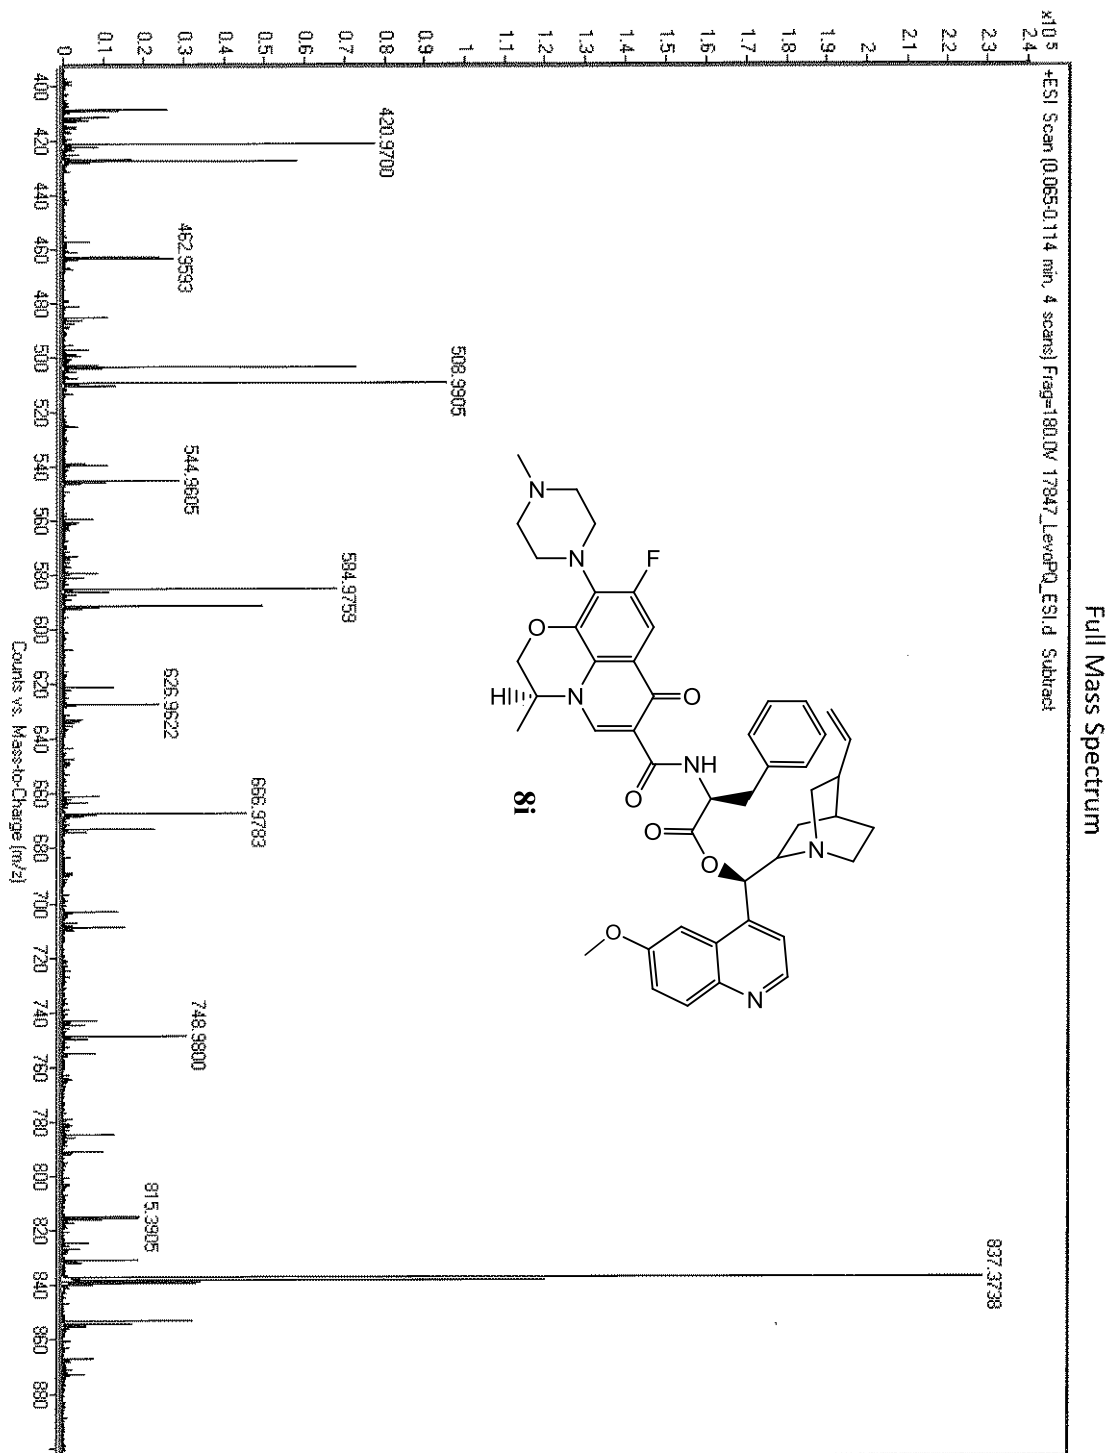

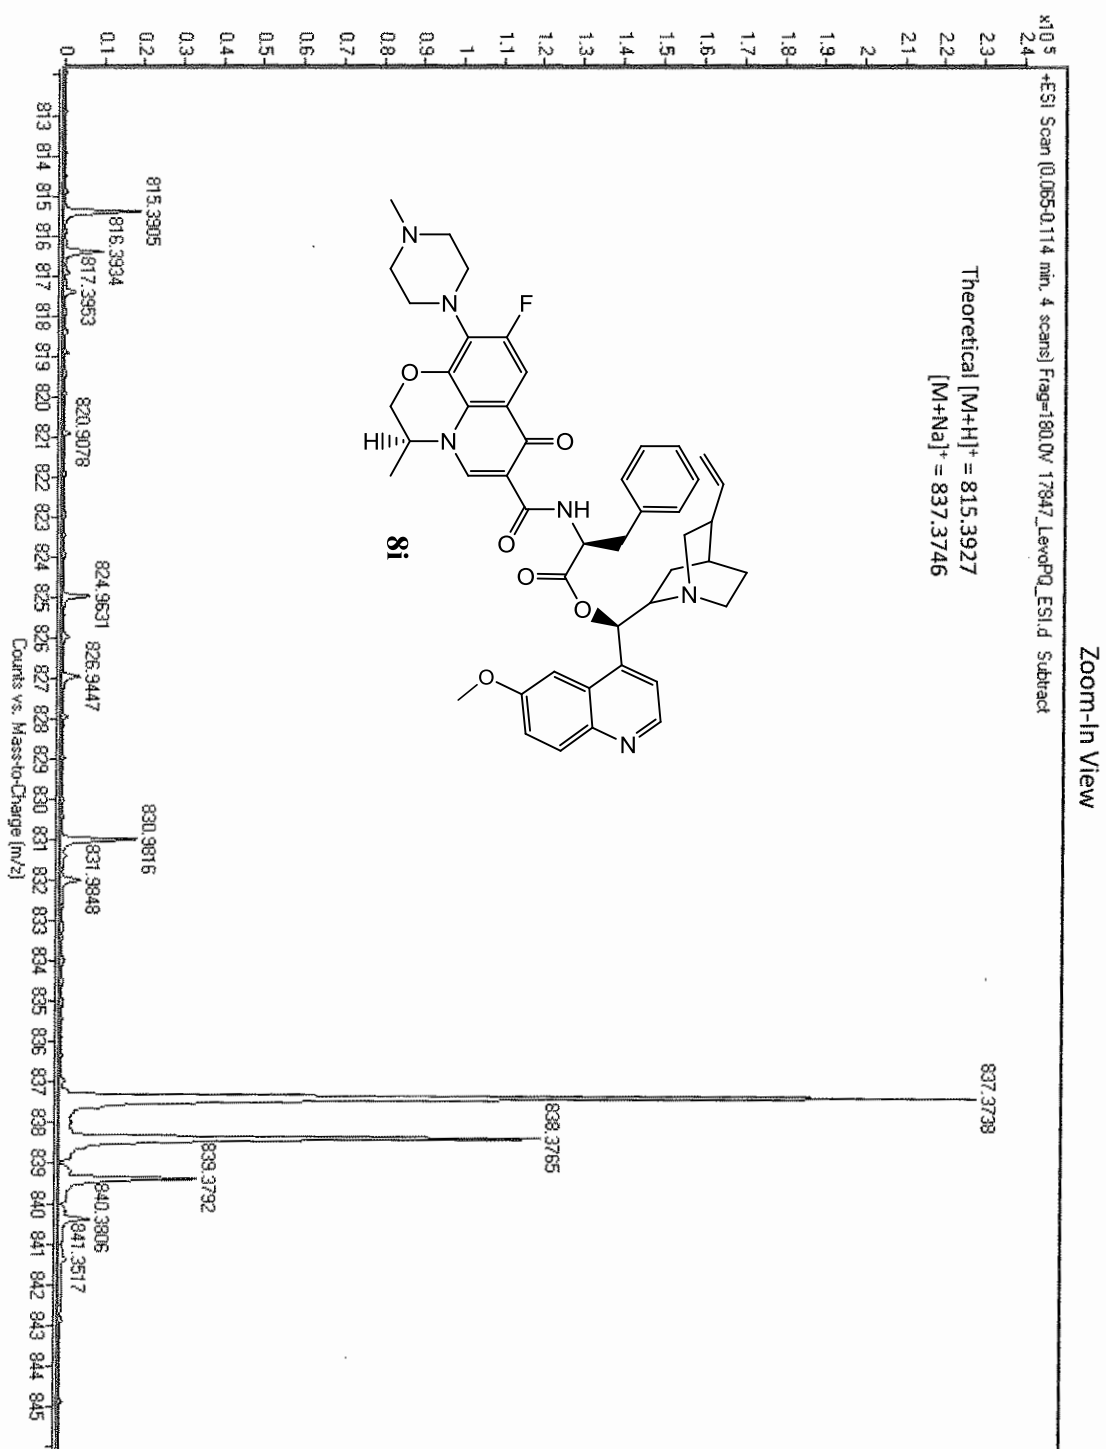

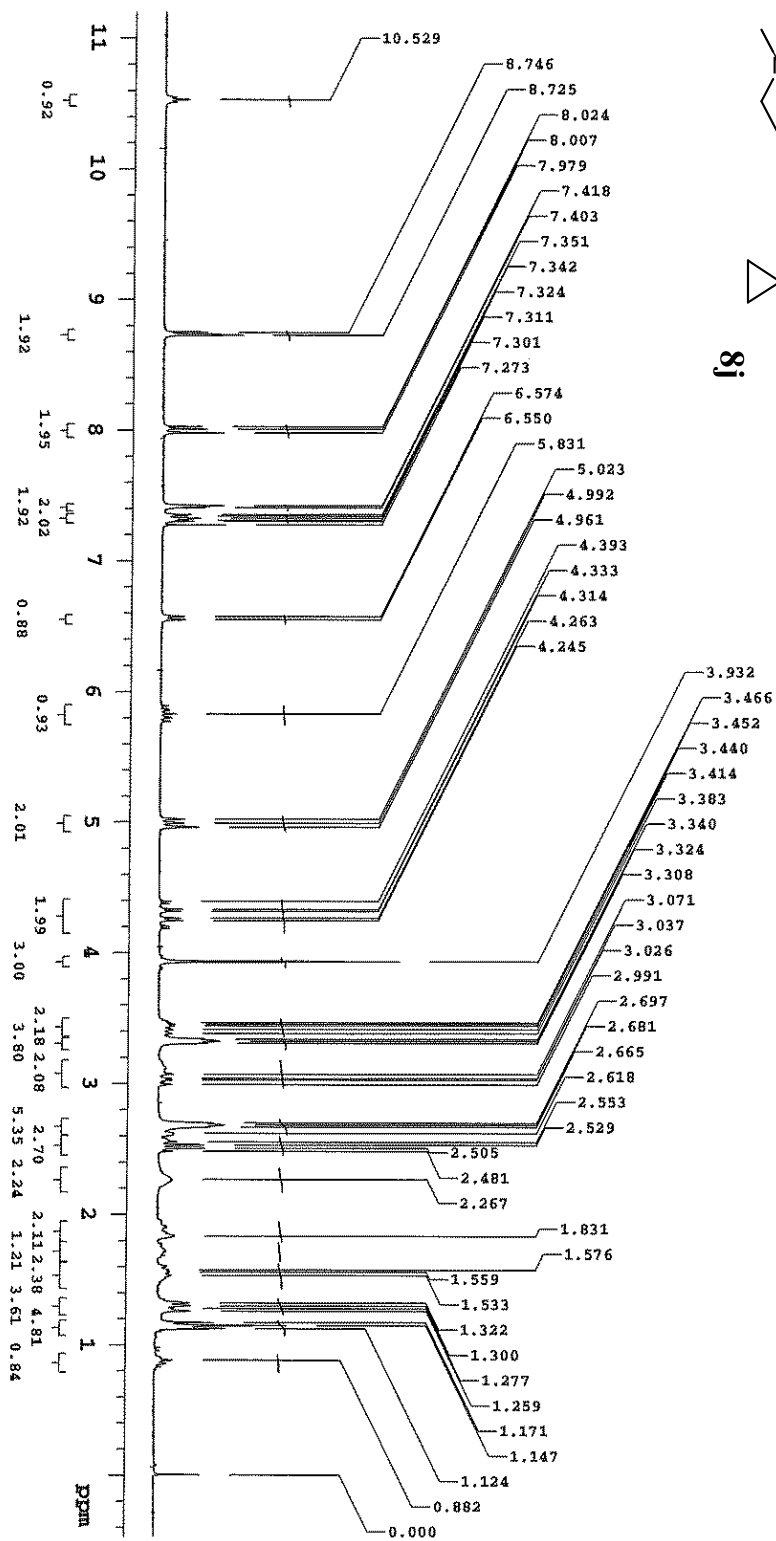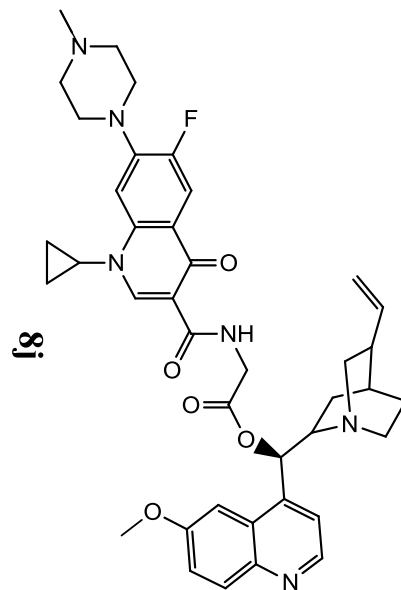

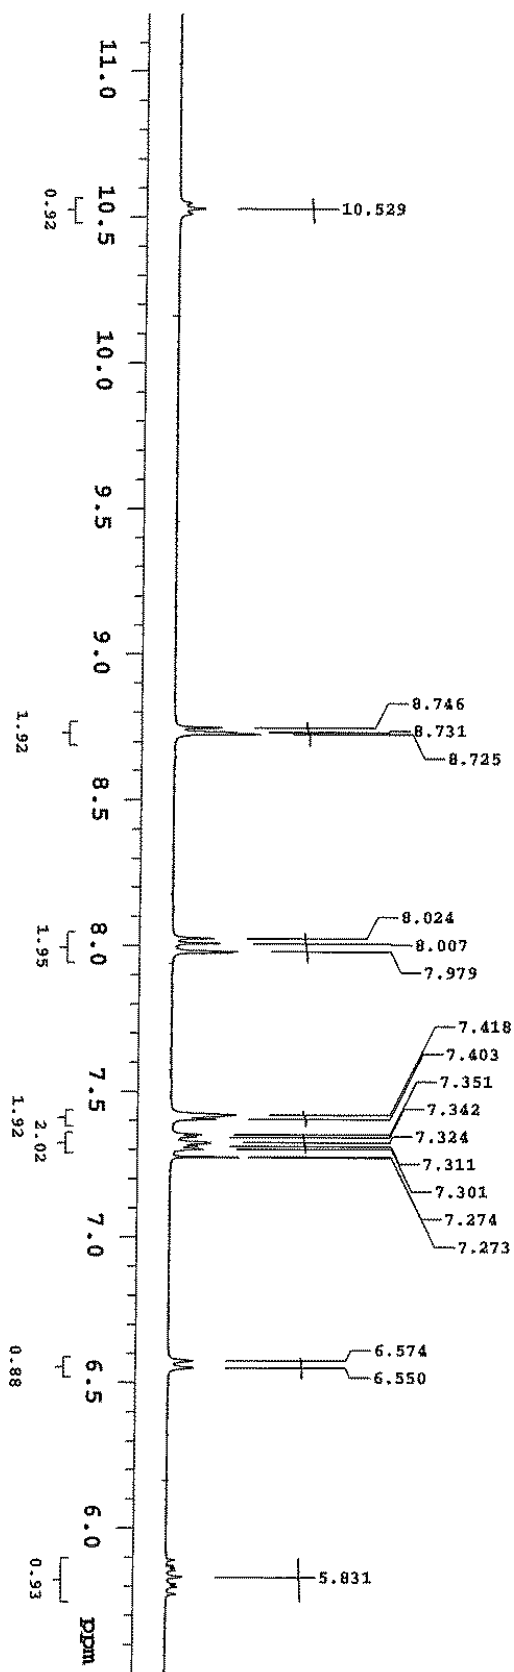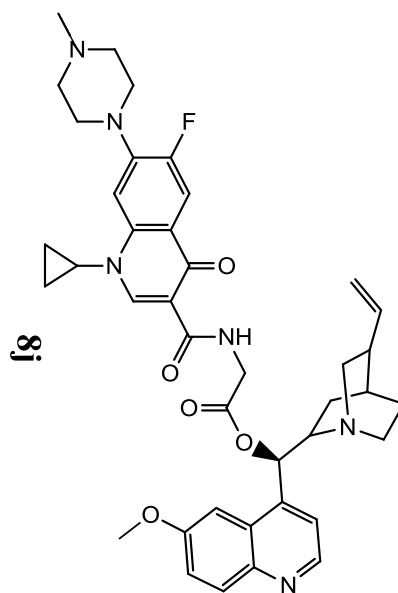



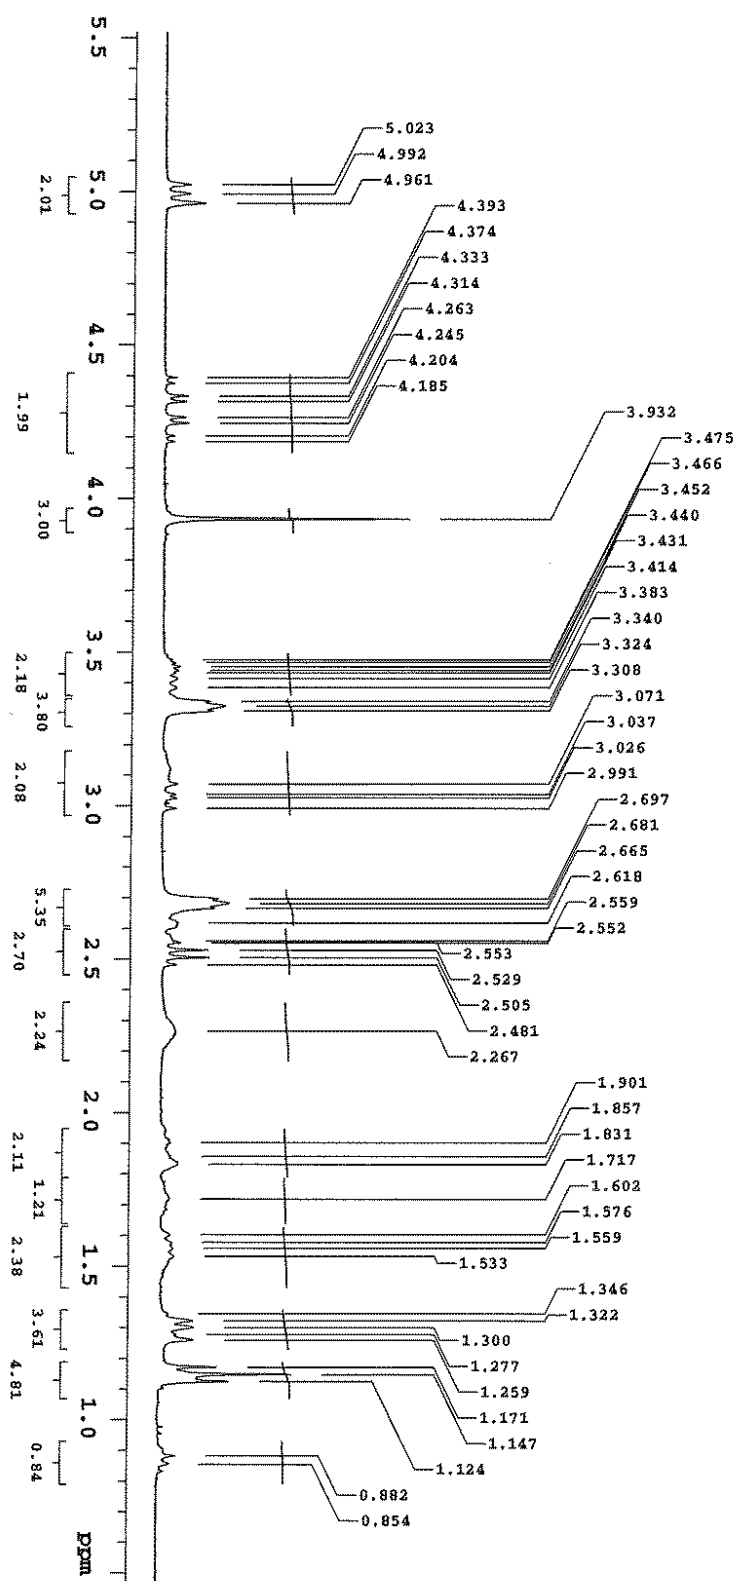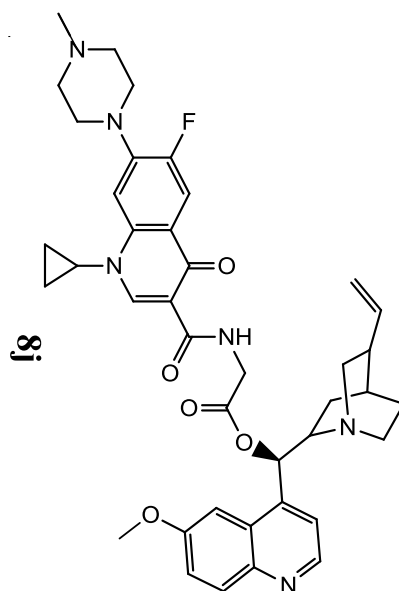

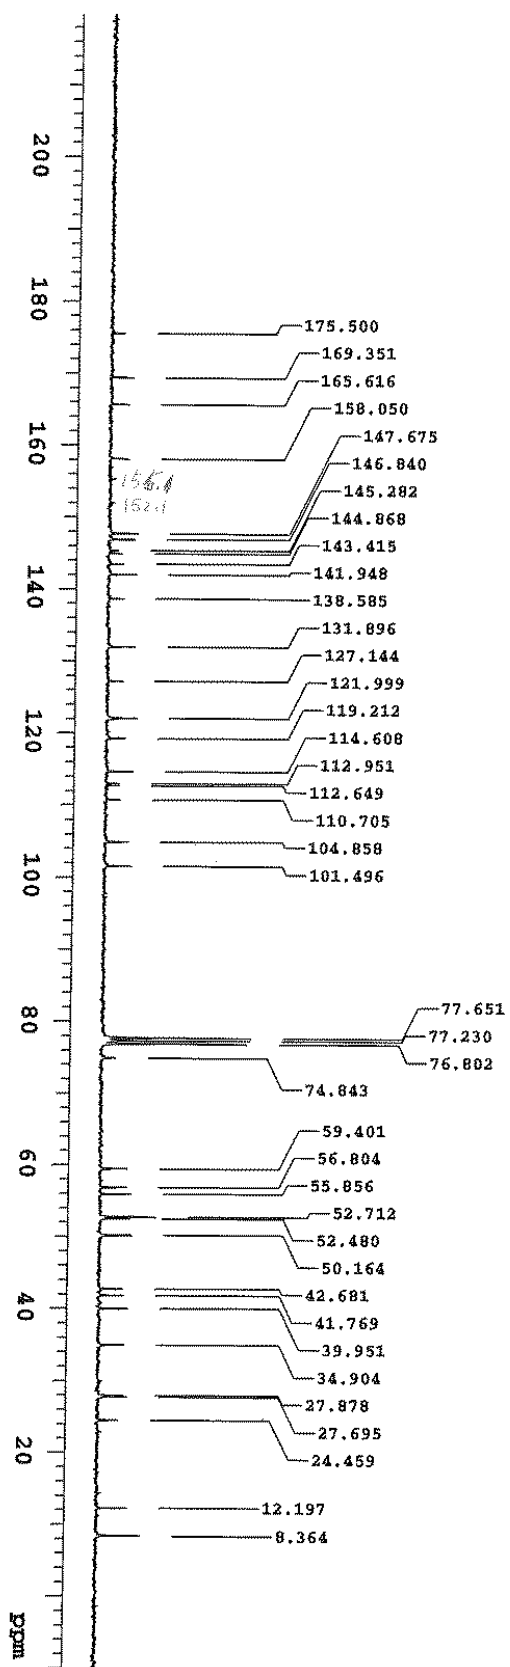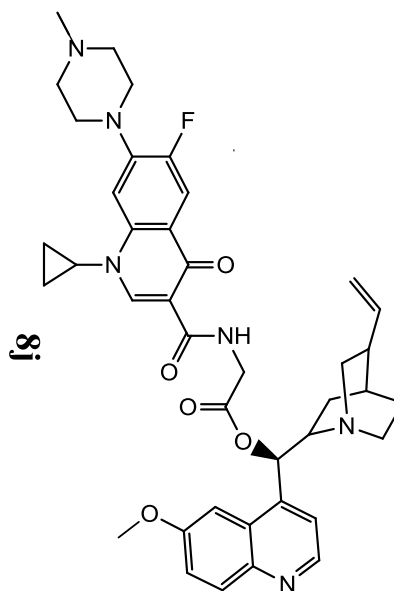

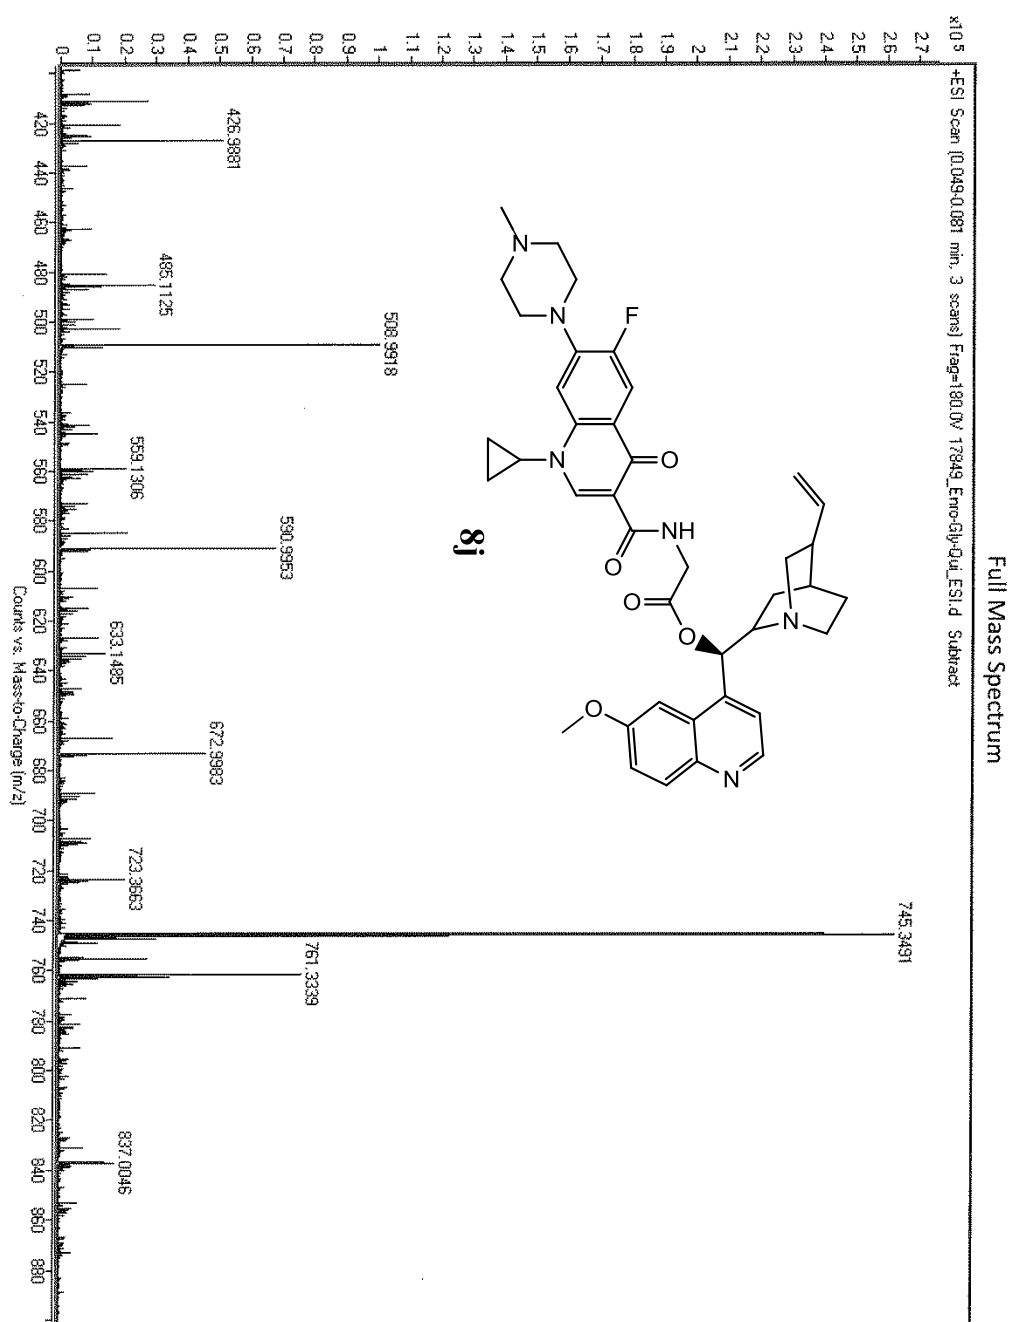

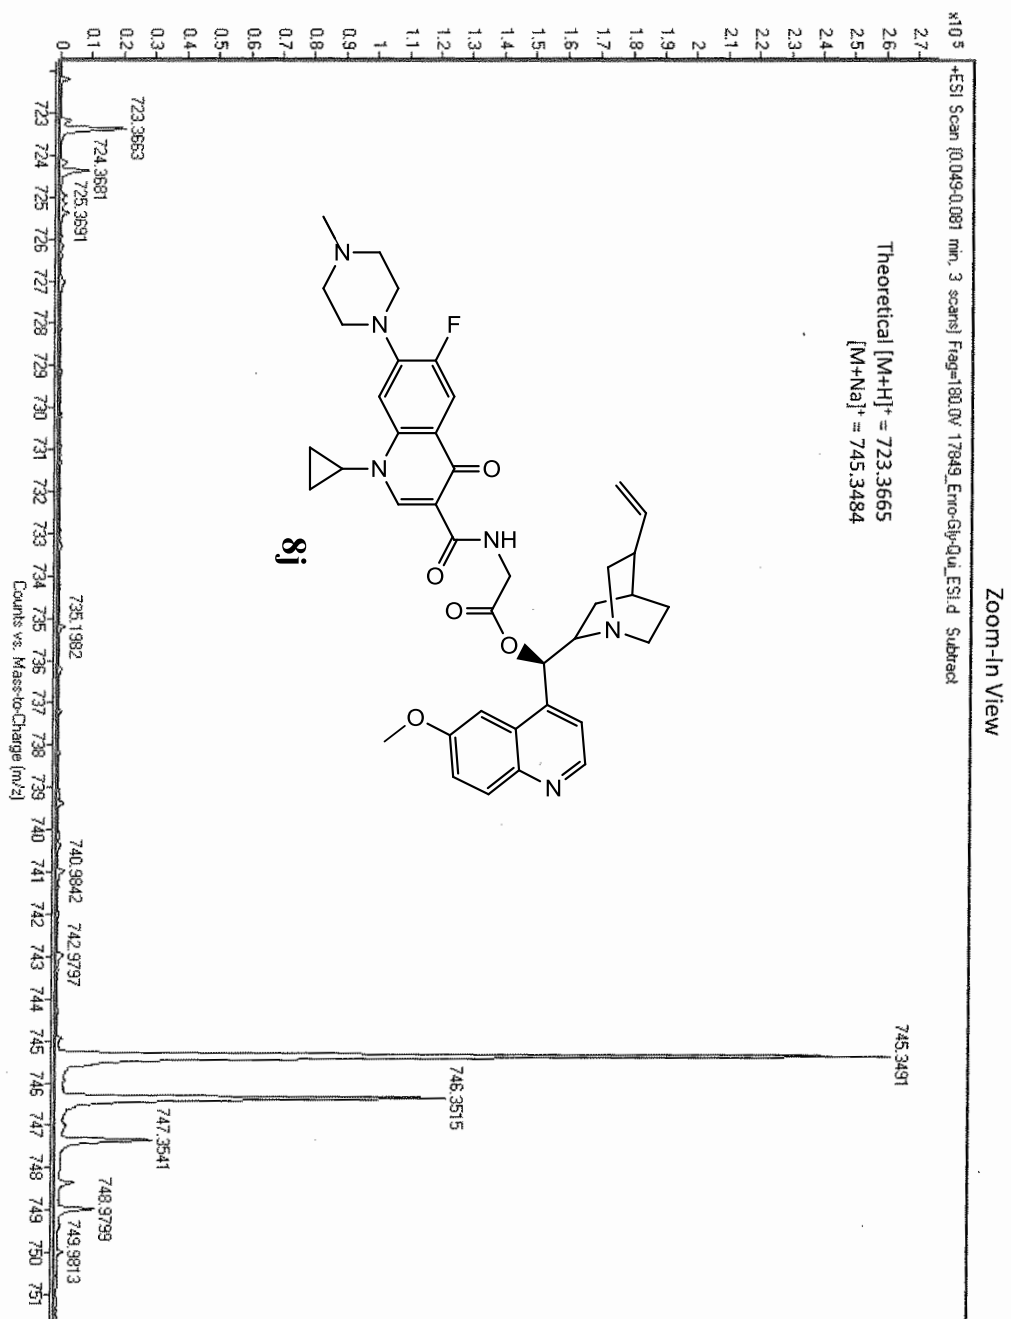

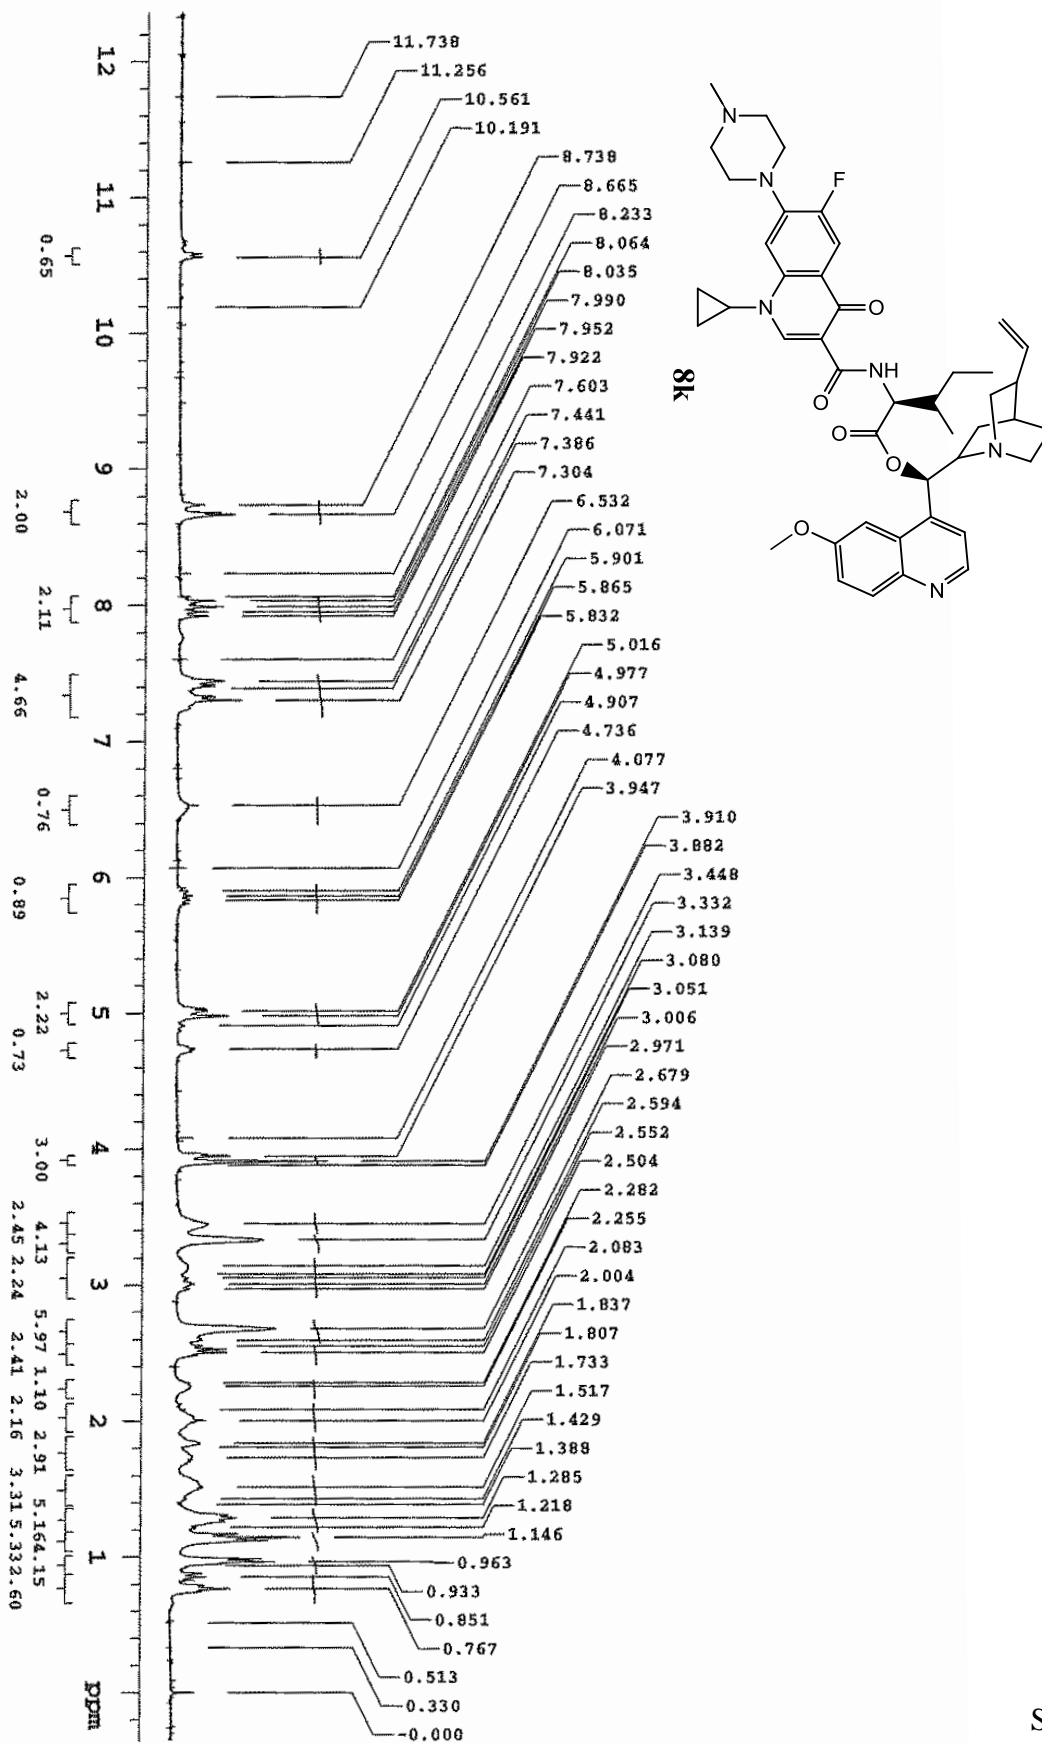

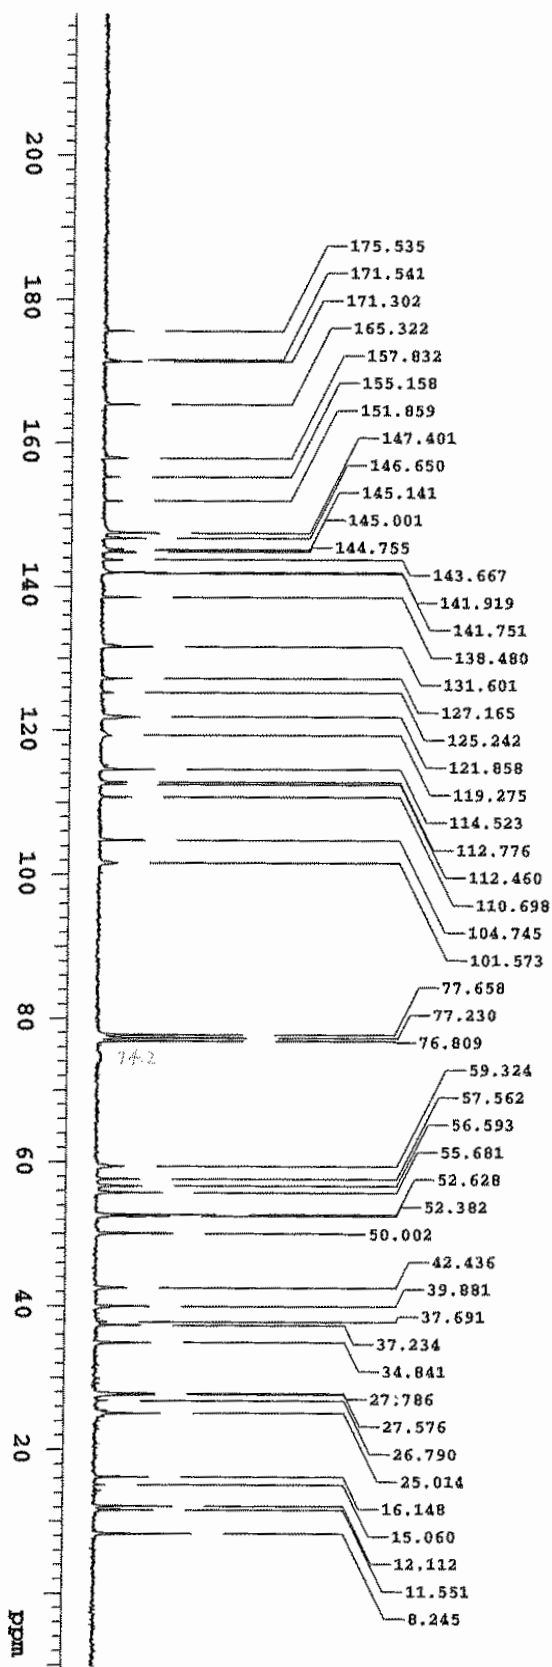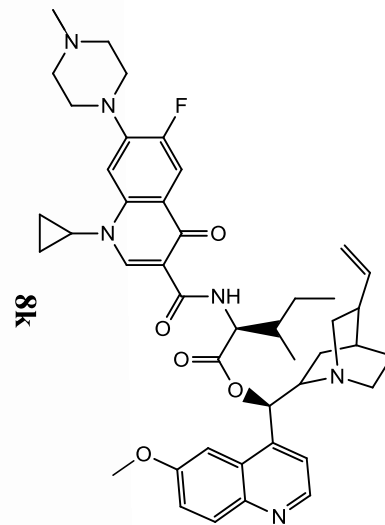

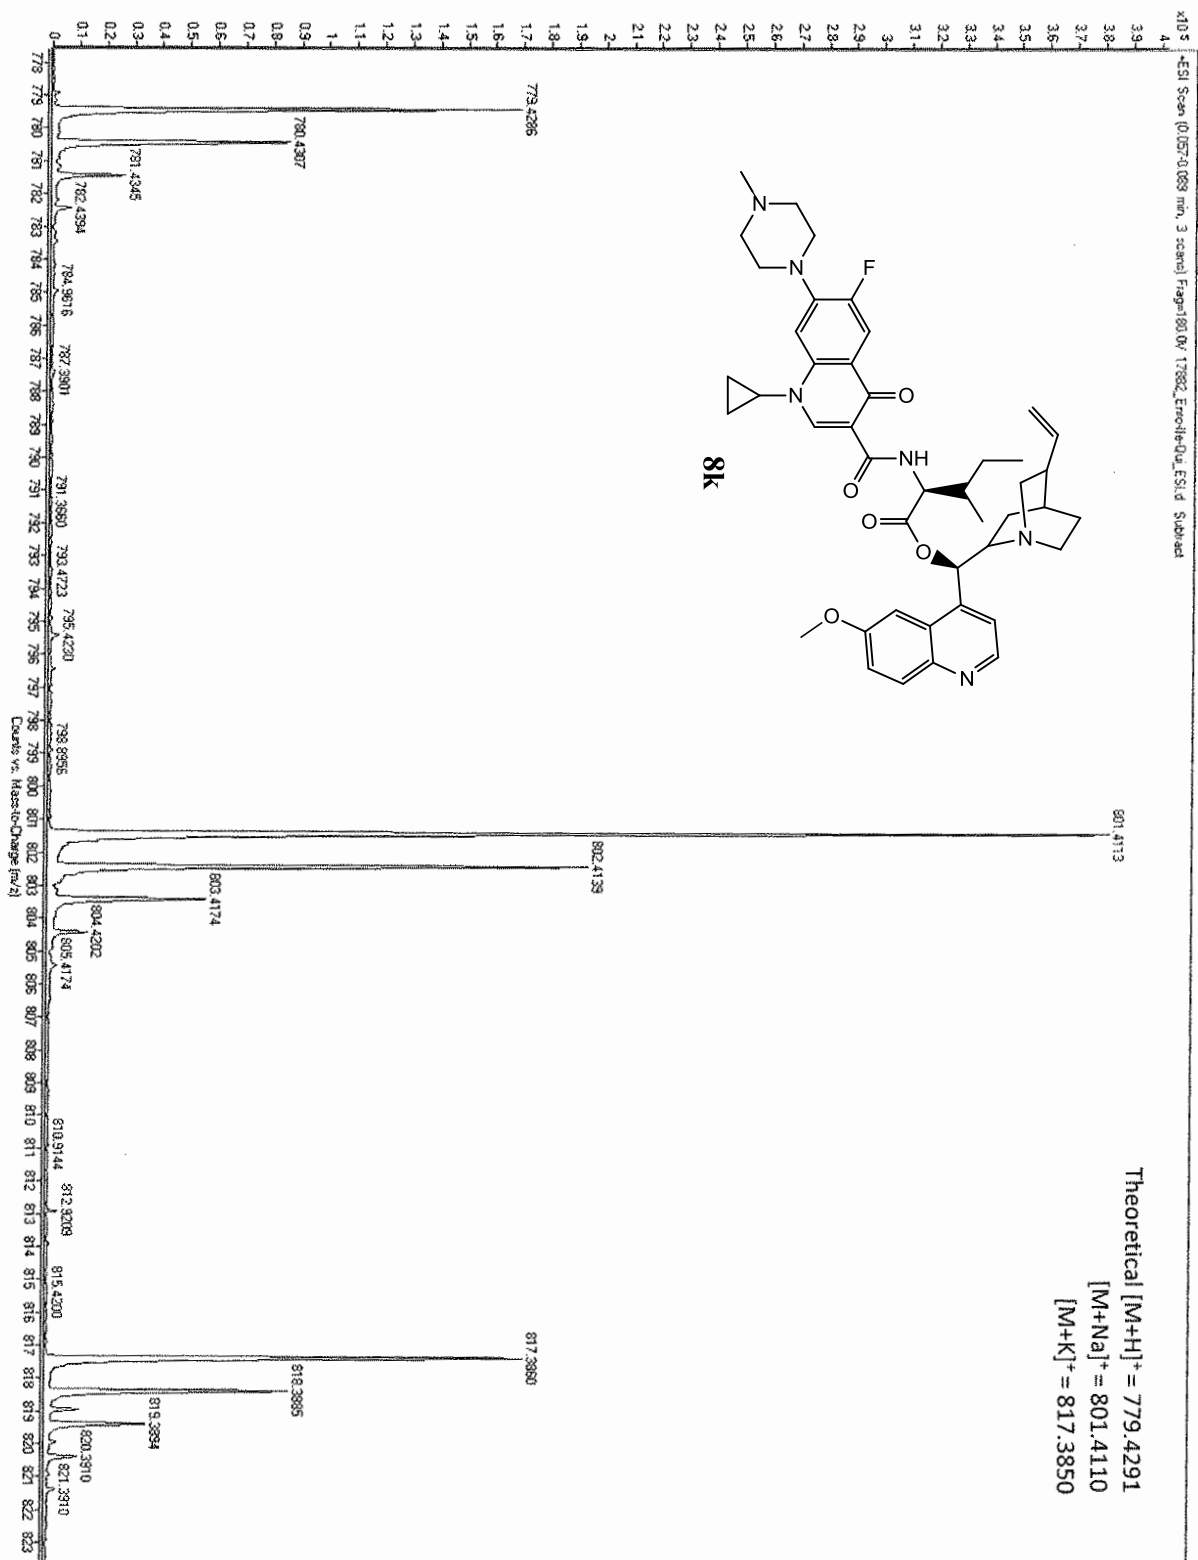

**Graphs shown with % Inhibition.**

**Antimalarial activity against *P. falciparum* strain 3D7**

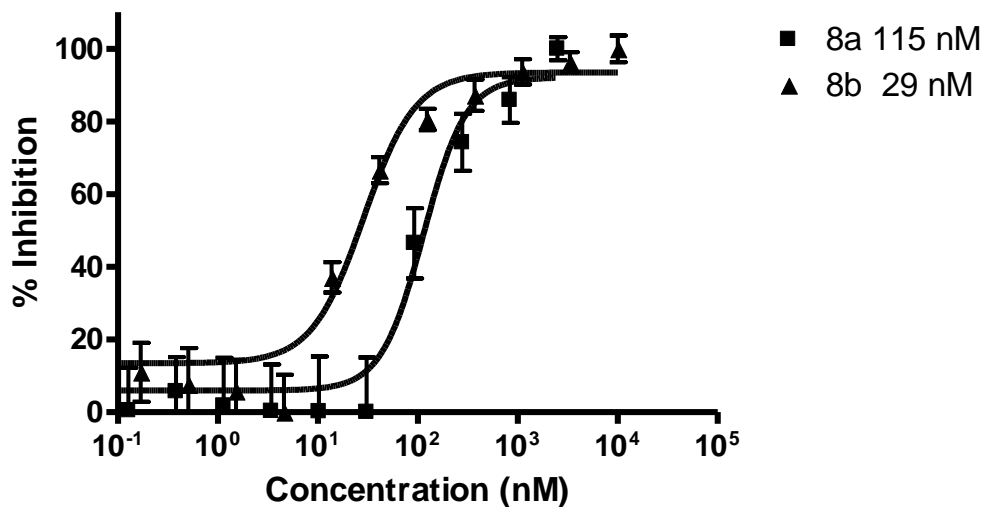

**Antimalarial activity against *P. falciparum* strain 3D7**

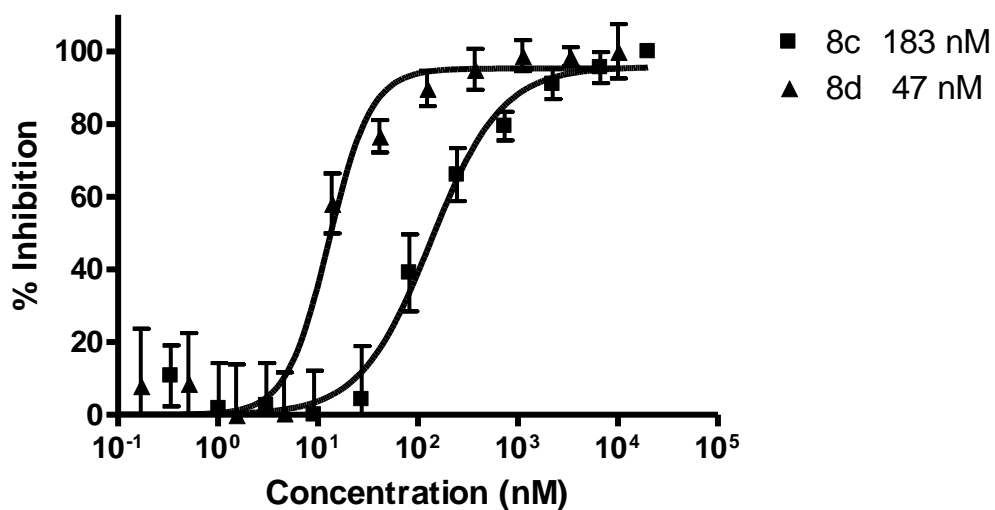



### Antimalarial activity against *P. falciparum* strain 3D7

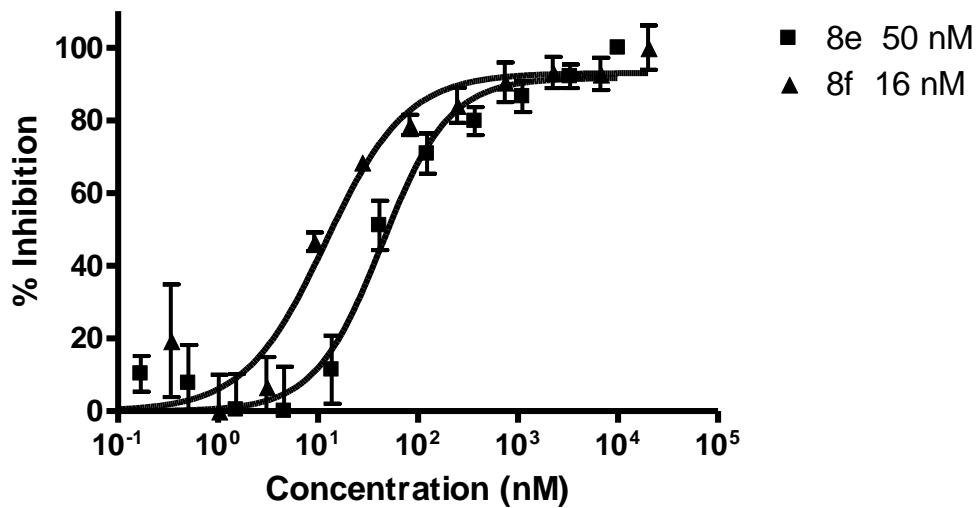

### Antimalarial activity against *P. falciparum* strain 3D7

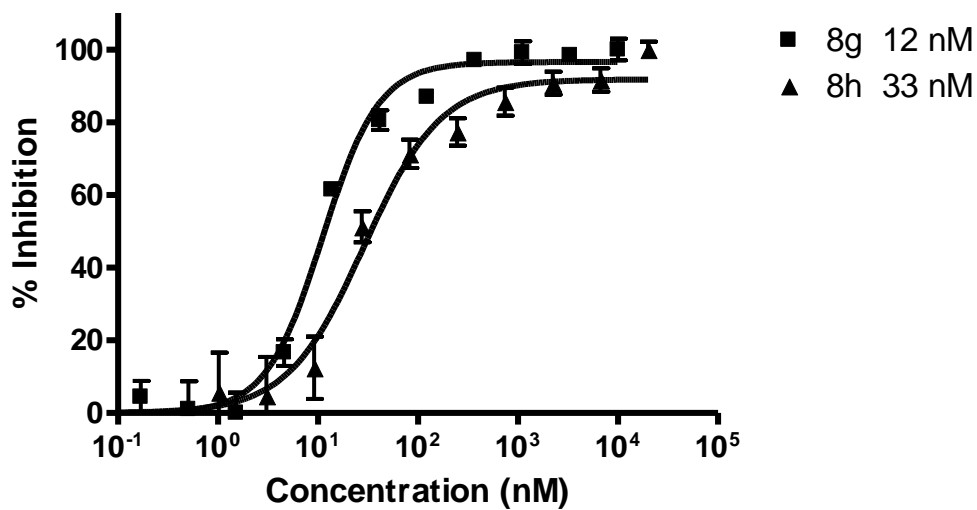

### Antimalarial activity against *P. falciparum* strain 3D7

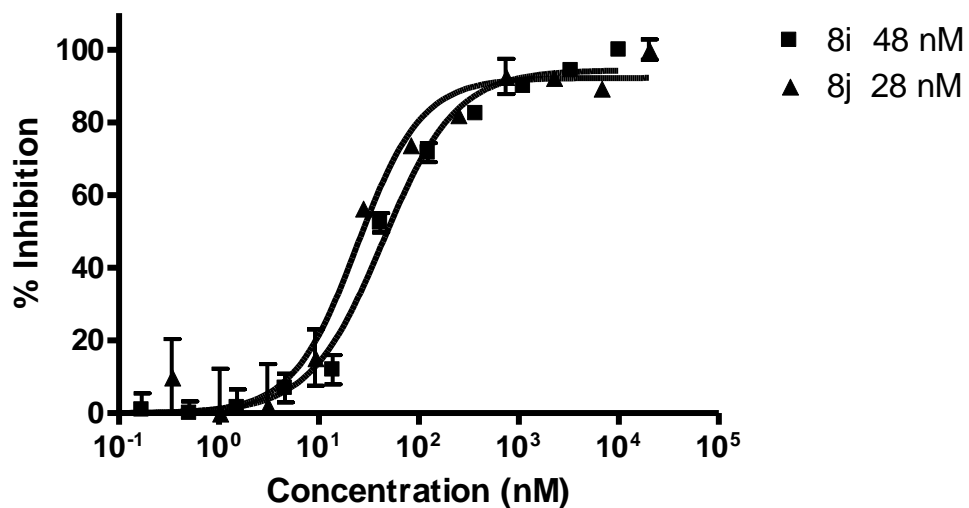

### Antimalarial activity against *P. falciparum* strain 3D7

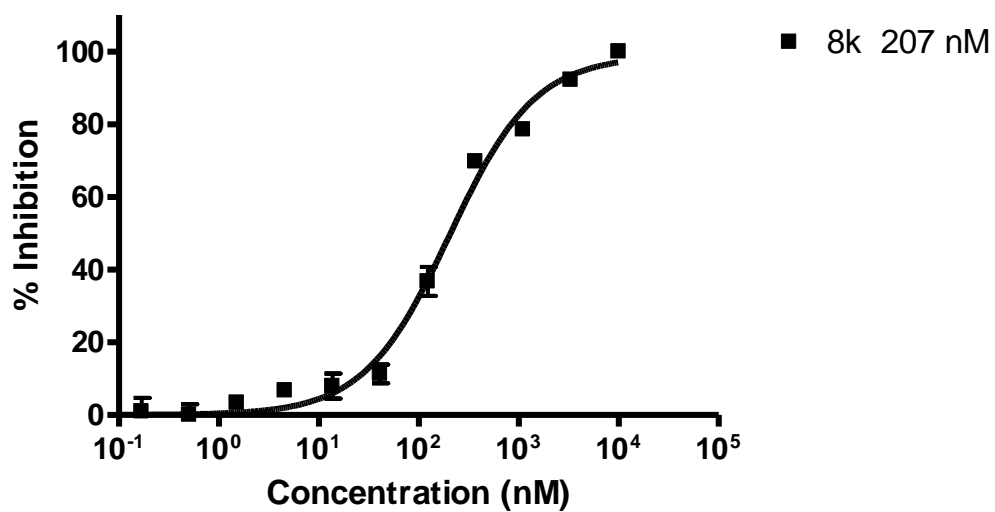

### Antimalarial activity against *P. falciparum* strain 3D7

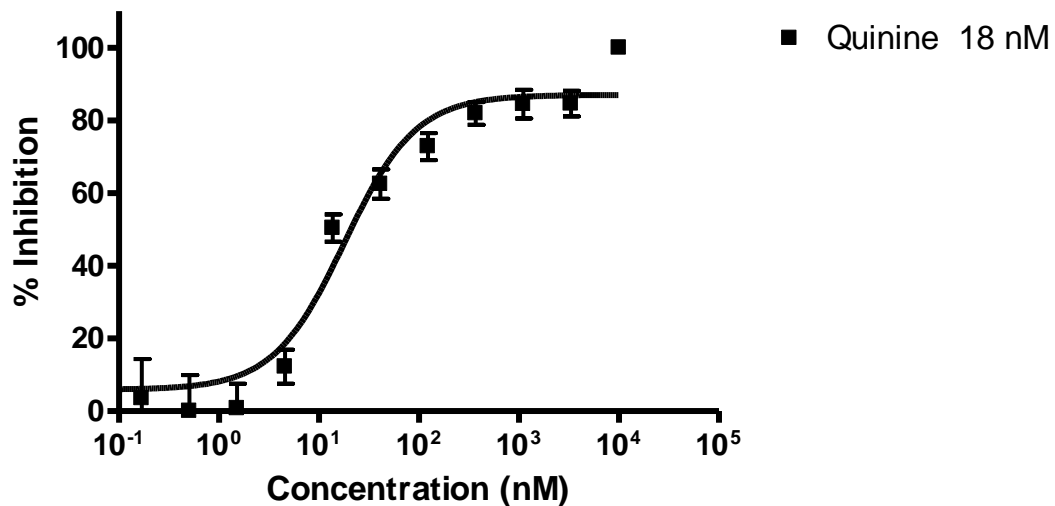

### Antimalarial activity against *P. falciparum* strain 3D7

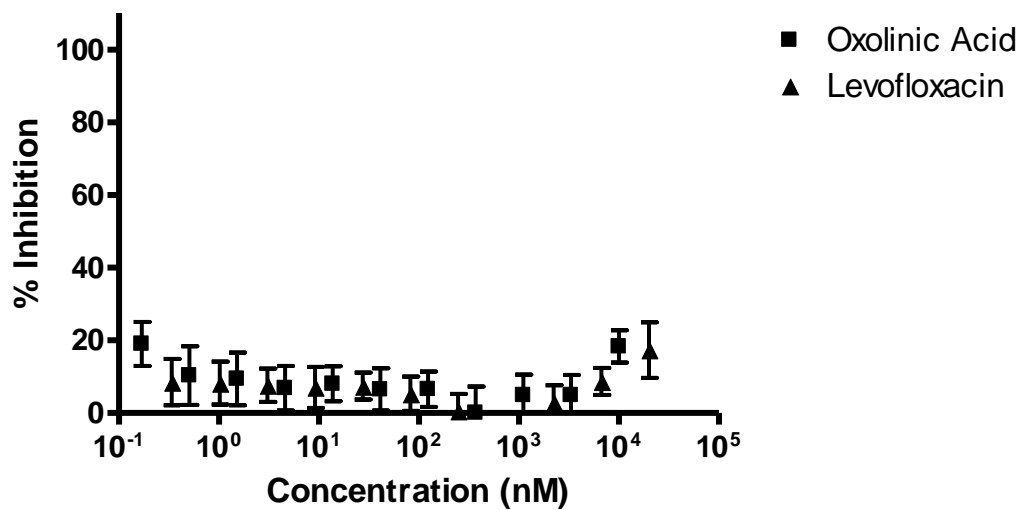

Supplement: c2ob26439k.pdf [file c2ob26439k.pdf]
